# Supplementary material for: Rapid molecular assays to study human centromere genomics
Source: PubMed Central journal article supplement — Genome Res. 2017 Dec;27(12):2040–9. doi: 10.1101/gr.219709.116 (PMC5741061; doi:10.1101/gr.219709.116), 2017-12
Supplement: supp_gr.219709.116_Supplemental_Fig_S2.pdf [file supp_gr.219709.116_Supplemental_Fig_S2.pdf]

Figure S2.

D1Z7/D5Z2/D19Z3

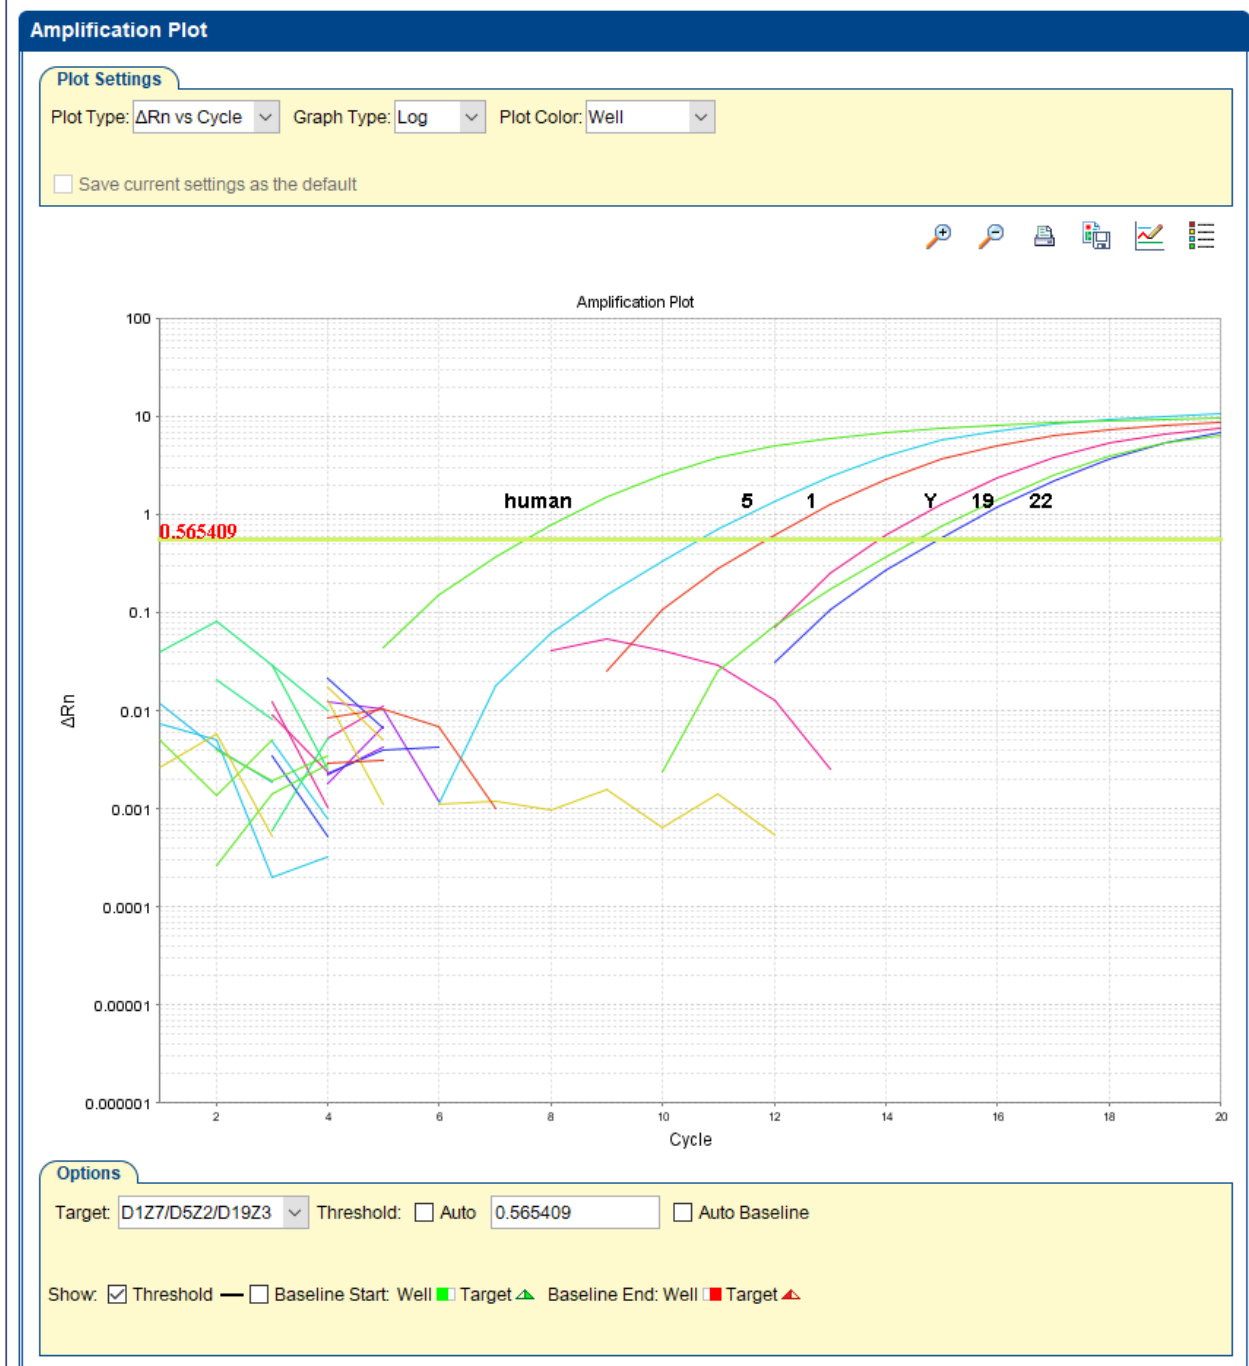

D4Z1

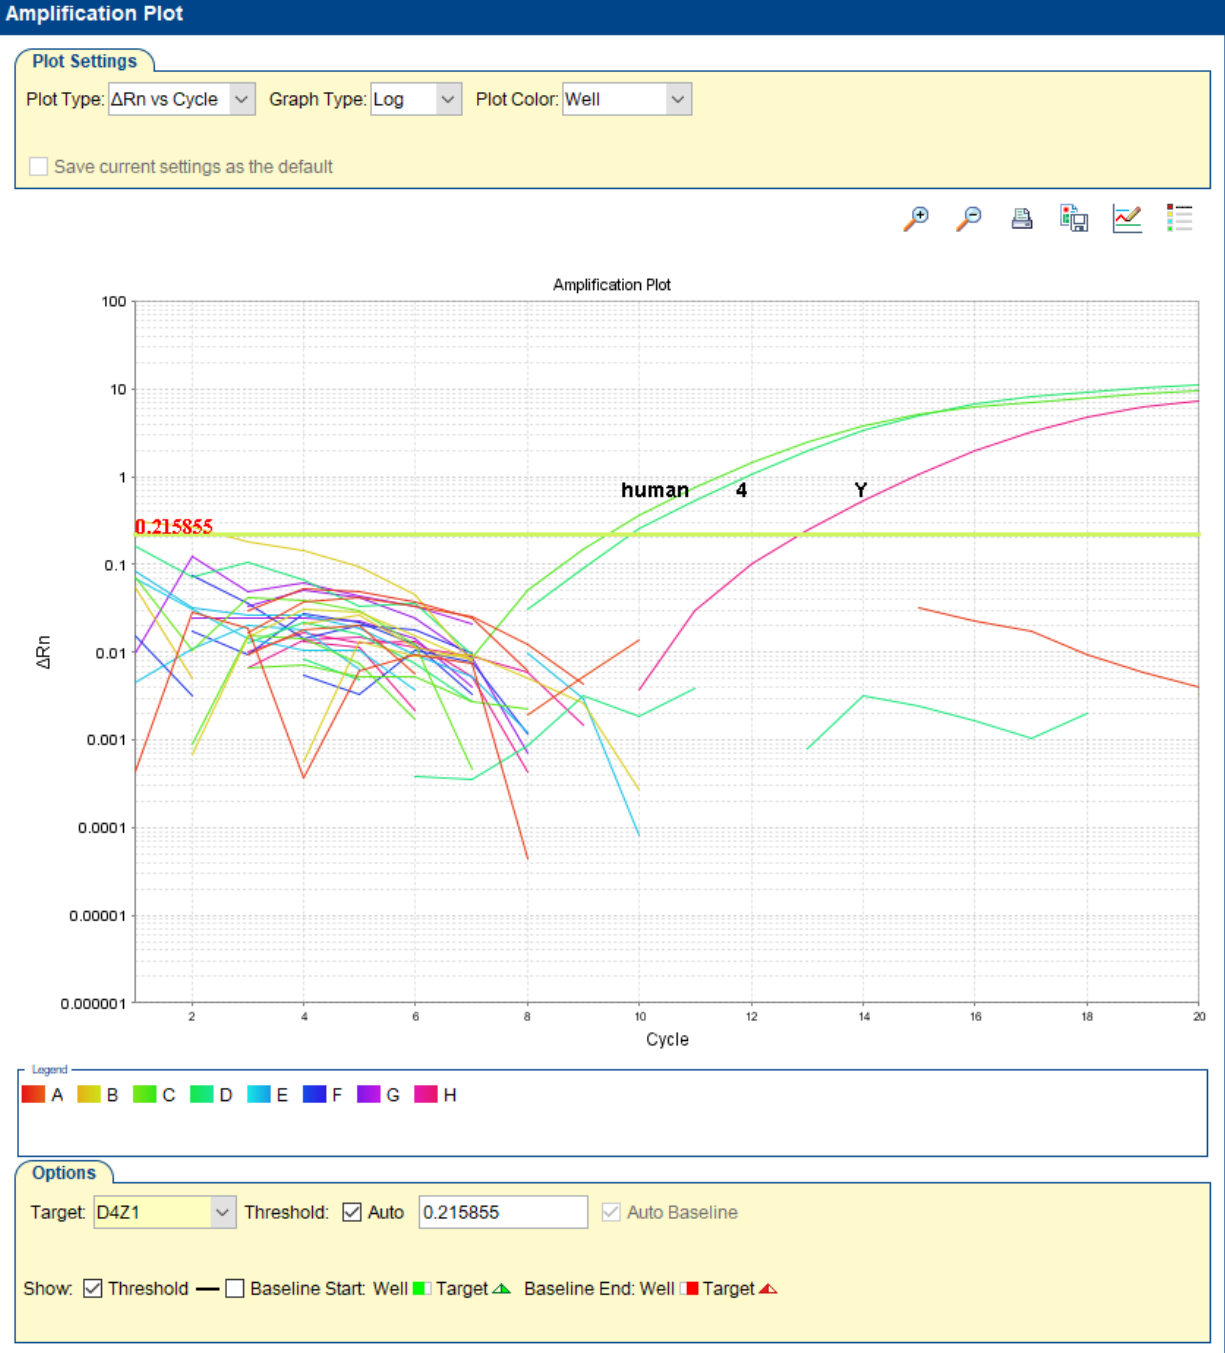

# D5Z1

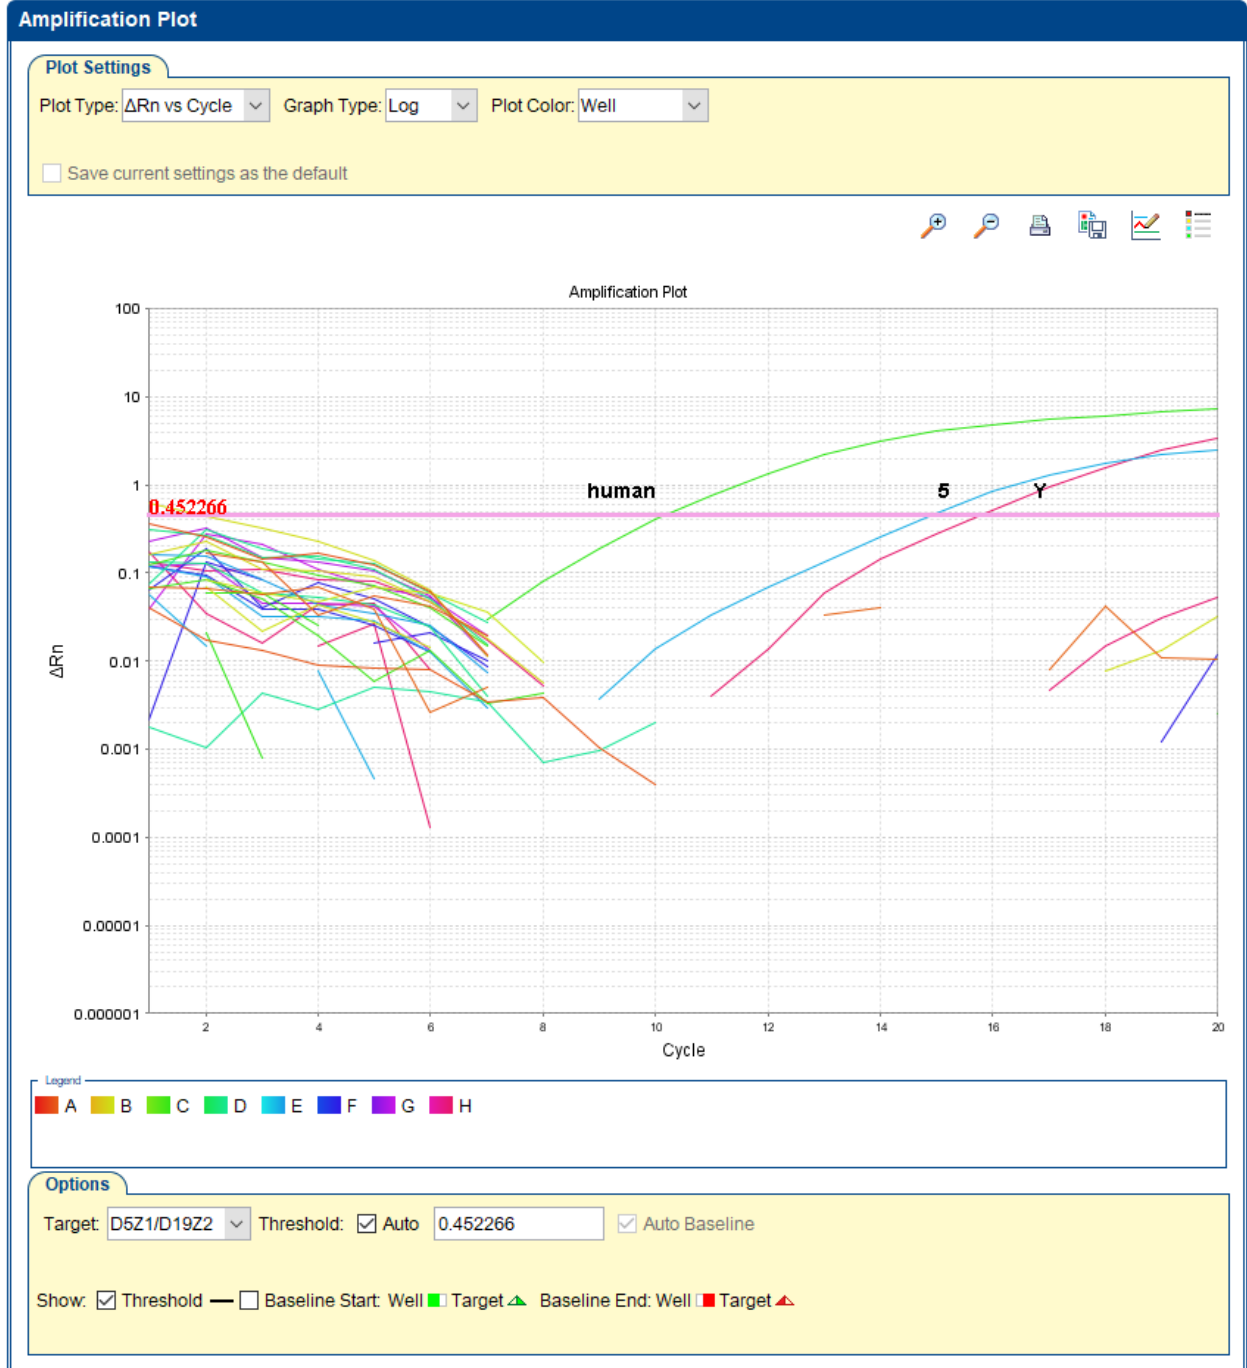

D7Z1

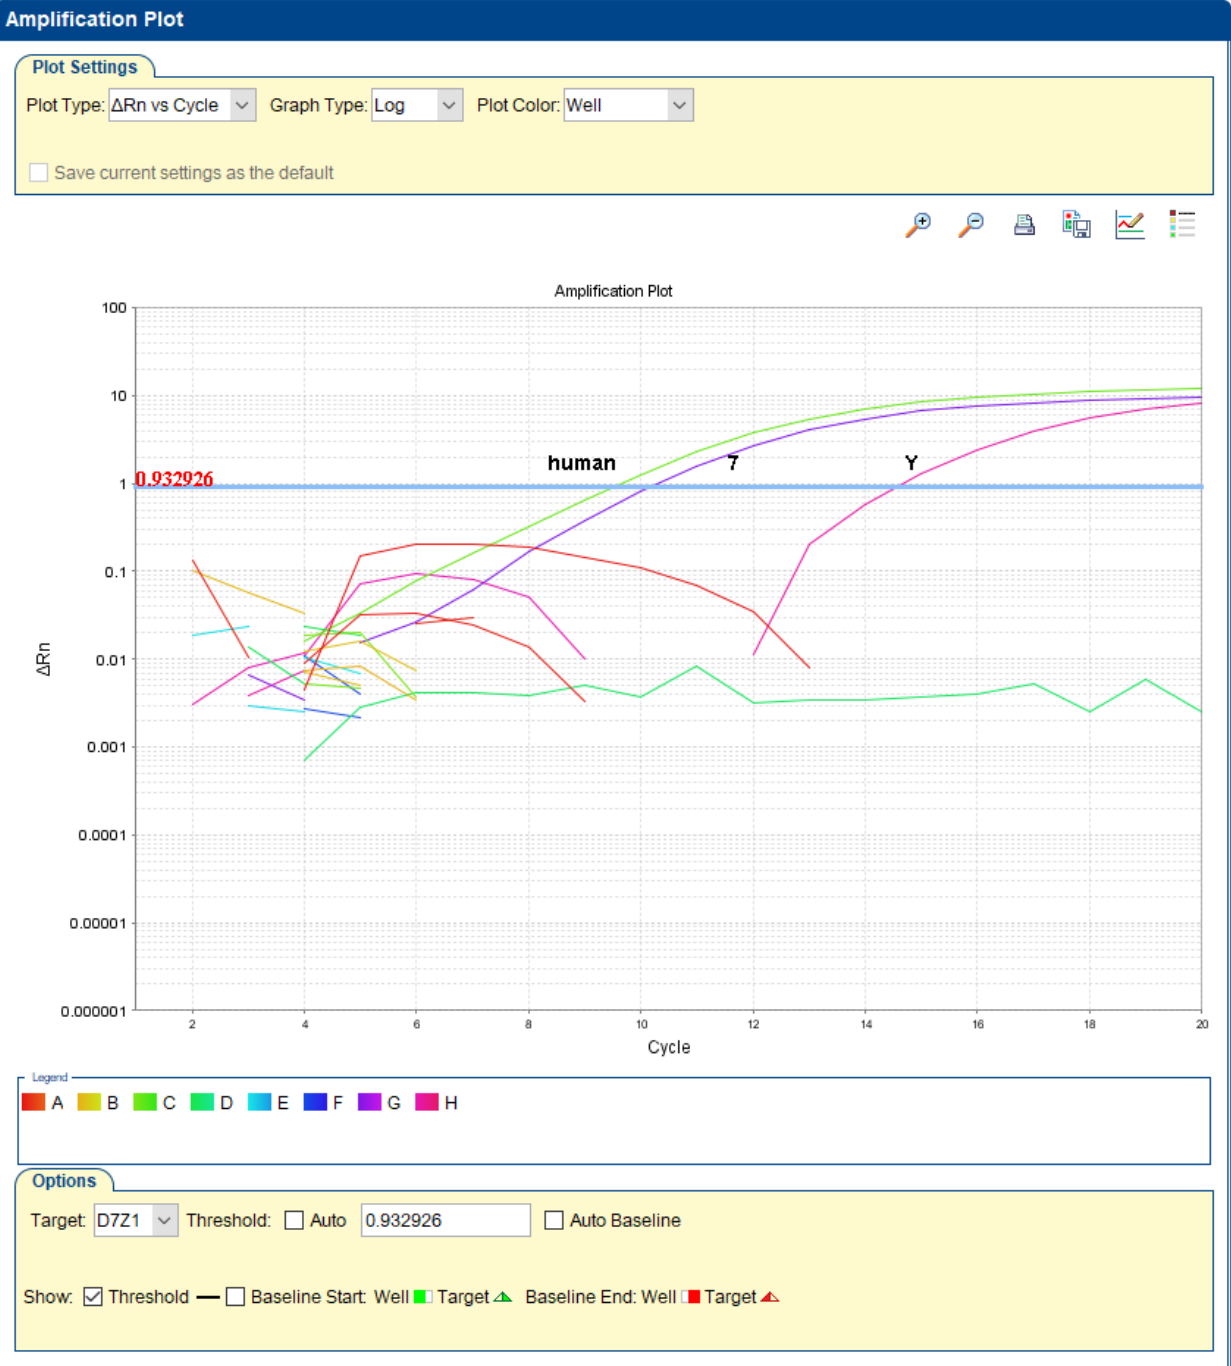

D7Z2

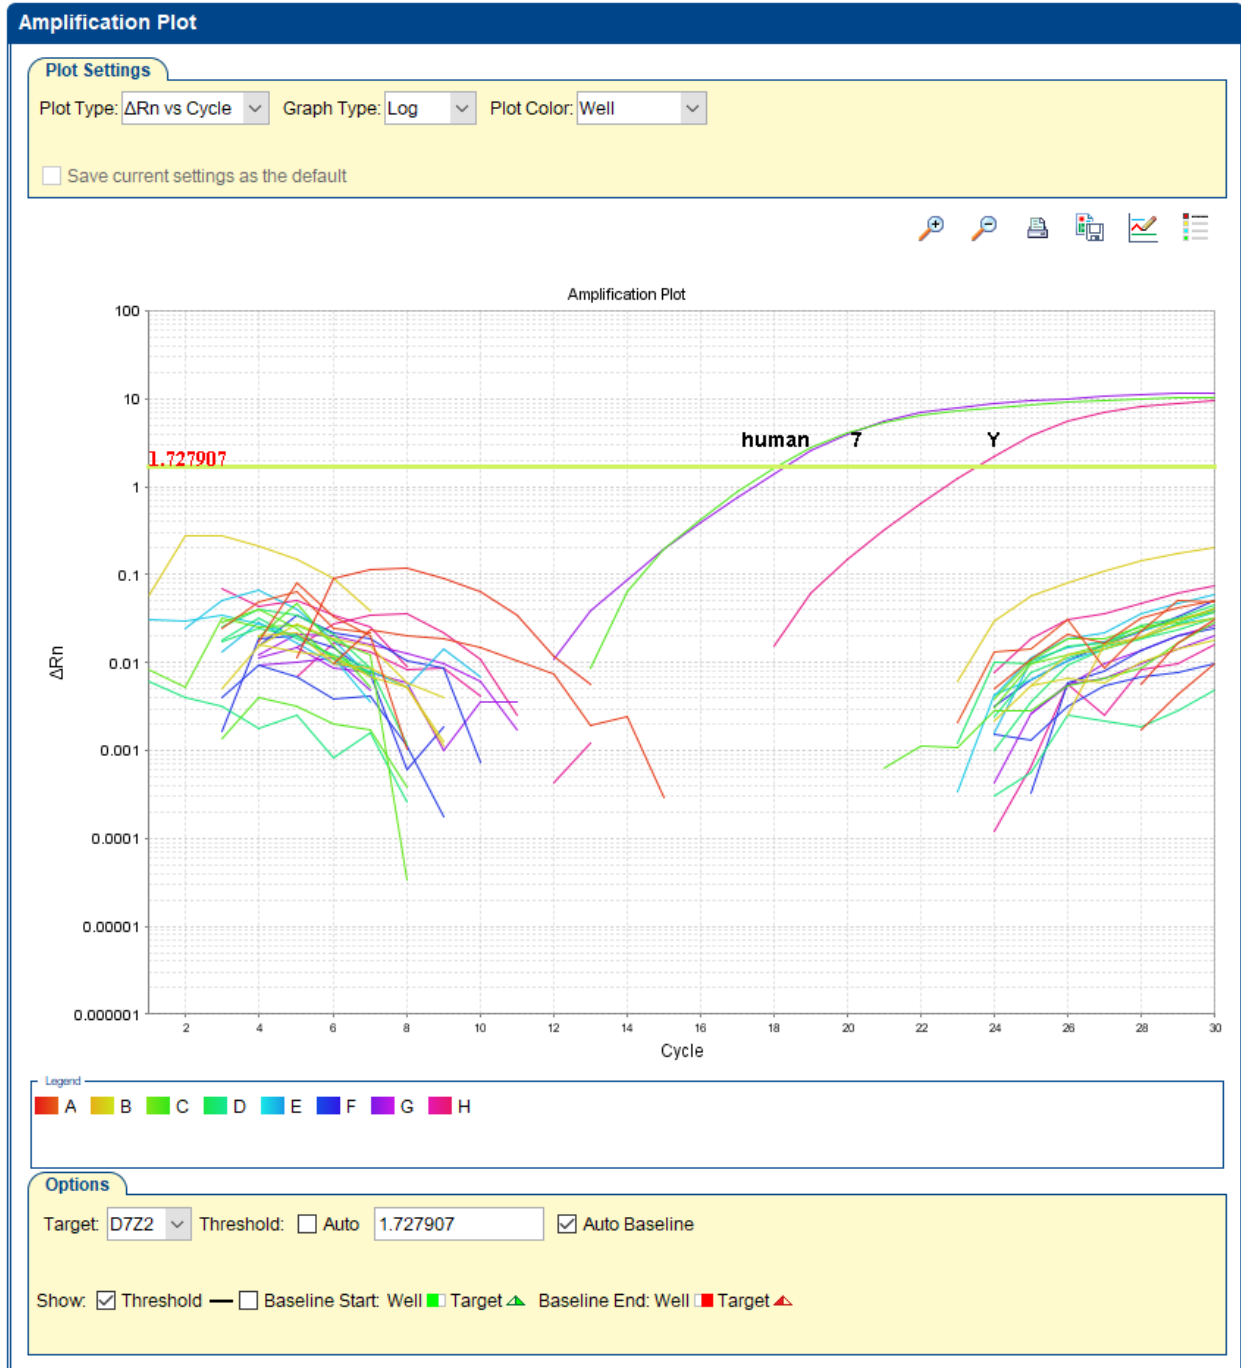

D9Z4

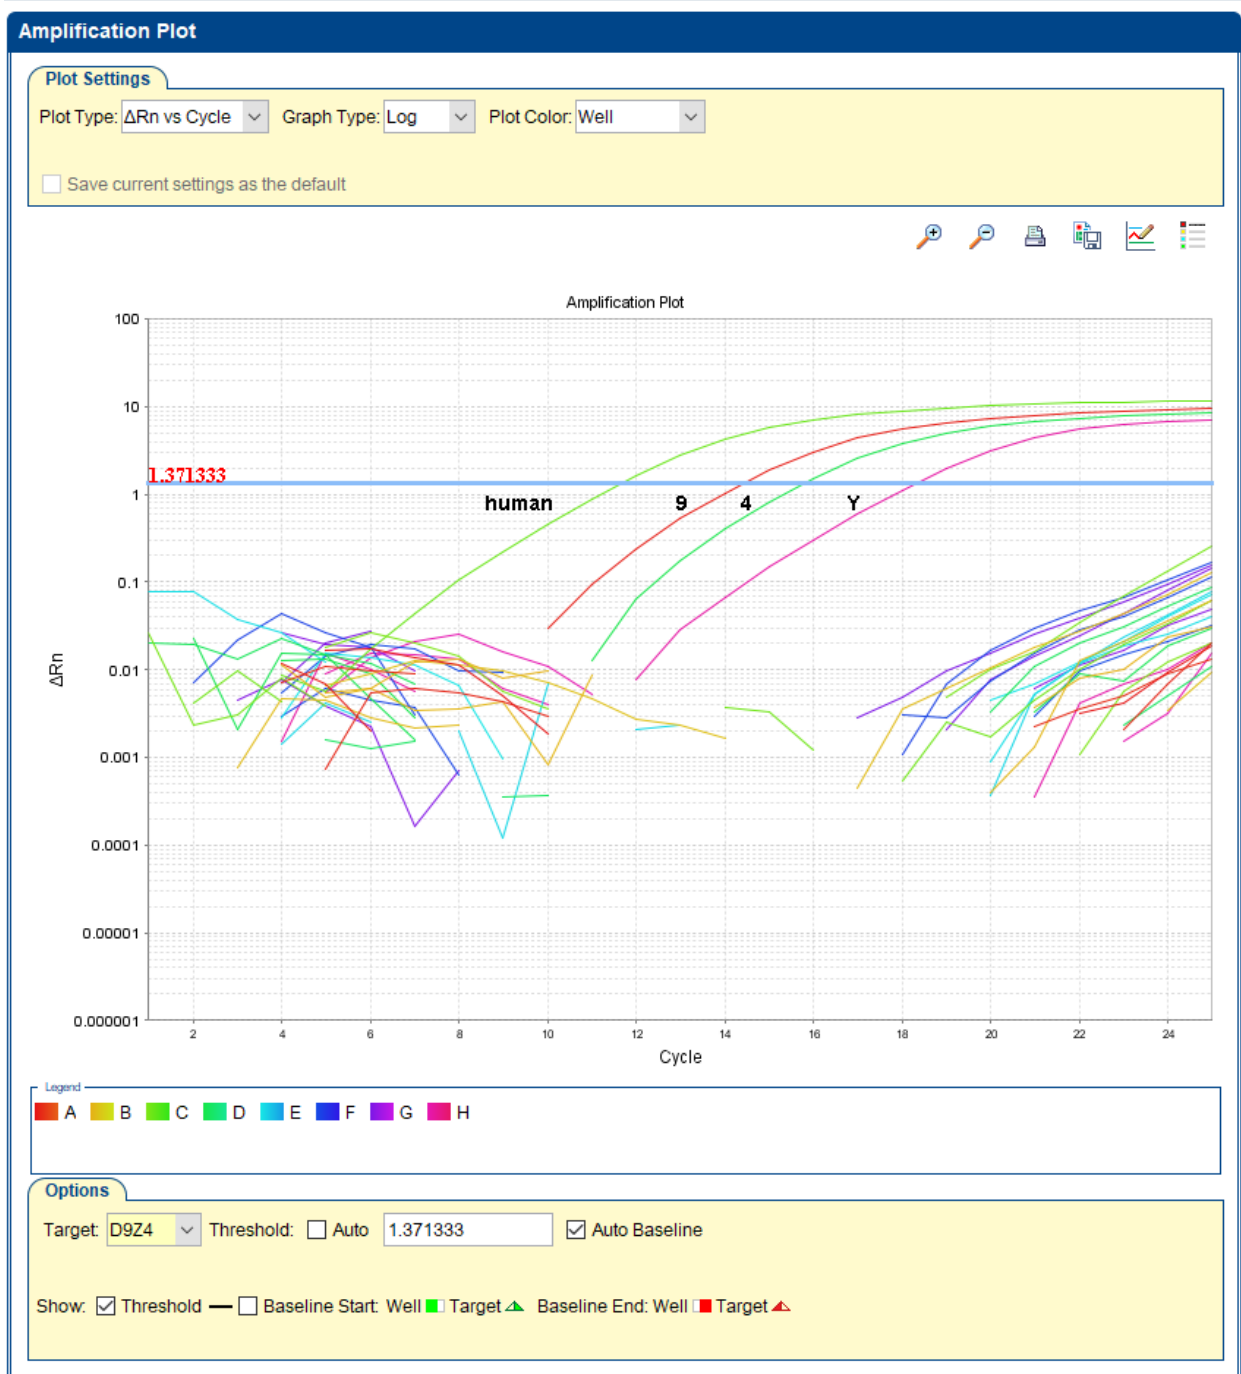

Analysis Summary

Total Wells in Plate: 96

Wells Called: 94

Wells Called Manually: 92

D13Z1/D21Z1

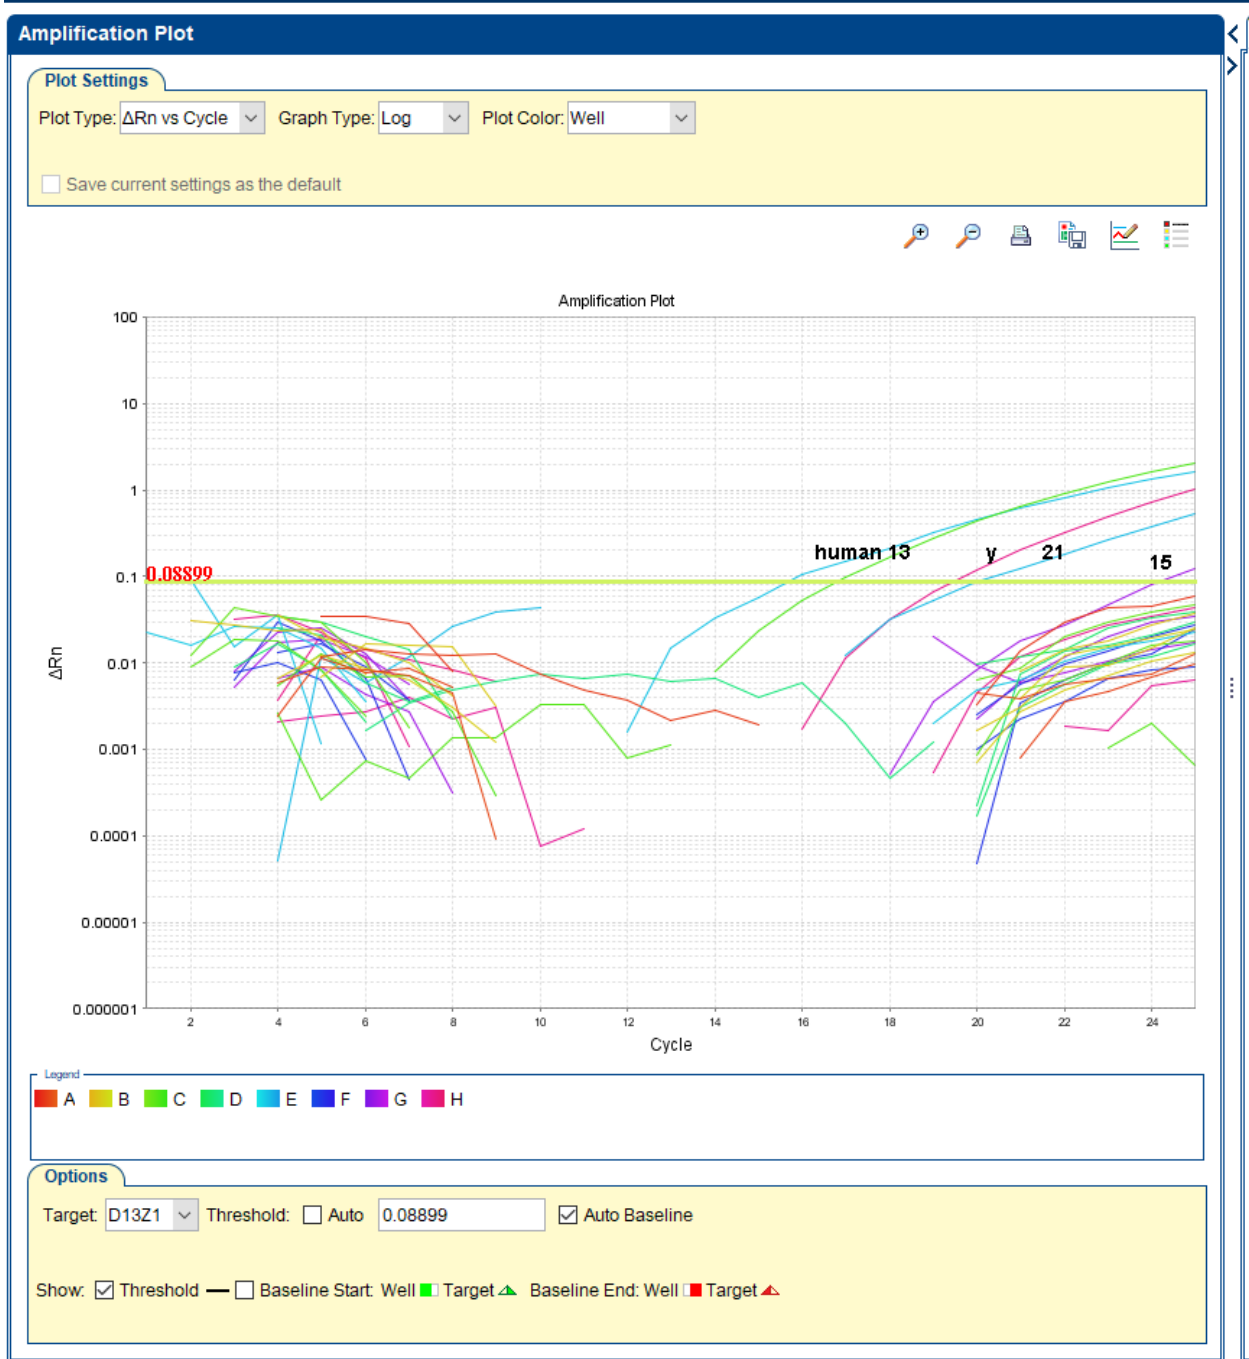

Analysis Summary:

Total Wells in Plate: 96

Wells Set Up: 84

Wells Omitted Manually: 0

D17Z1

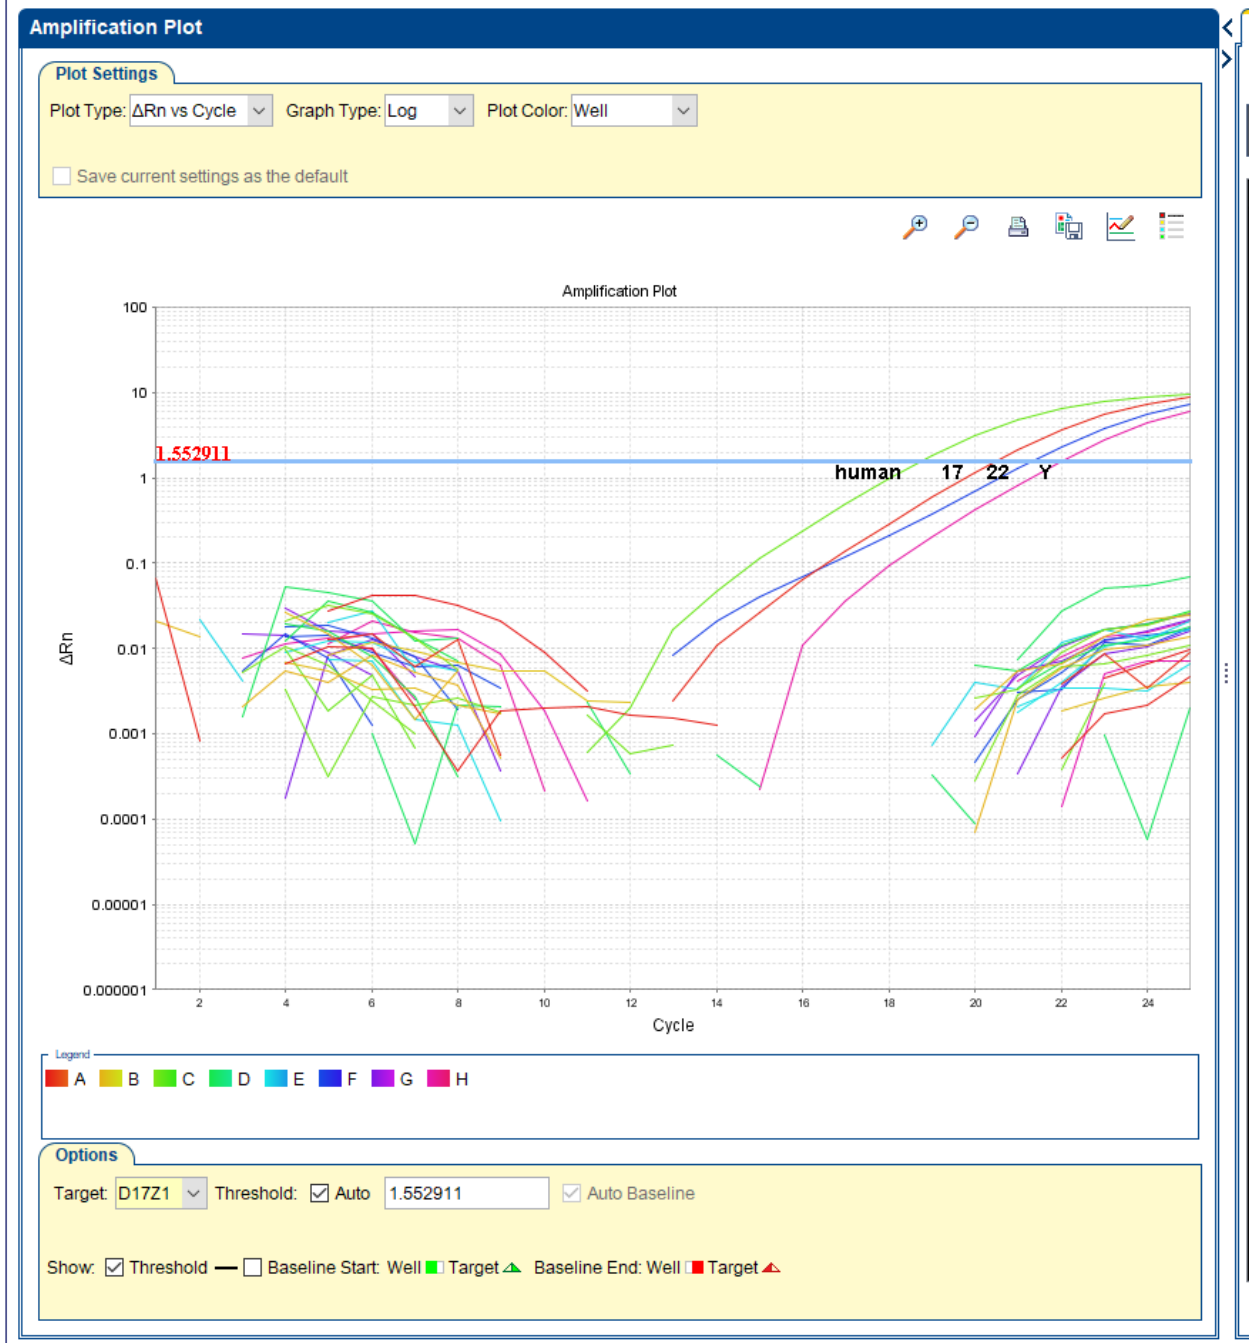



D18Z1

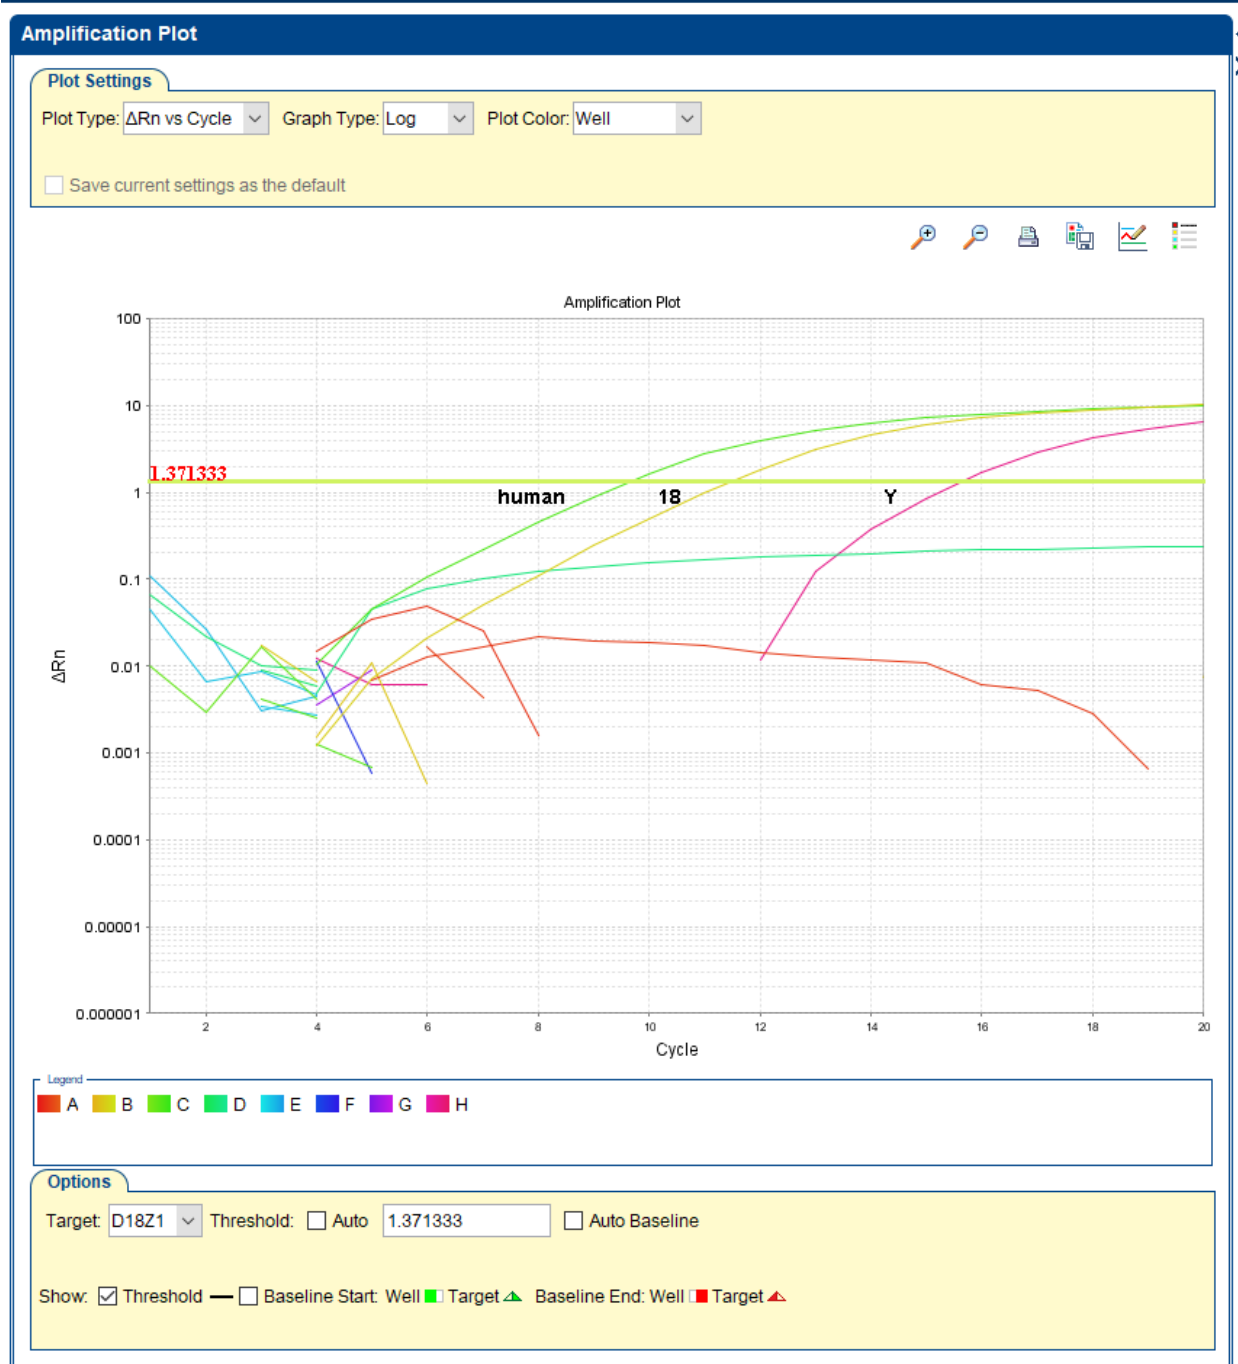

Analysis Summary:

Total Wells in Plate: 96

Wells Set Up: 84

Wells Omitted Manually: 0

D18Z2

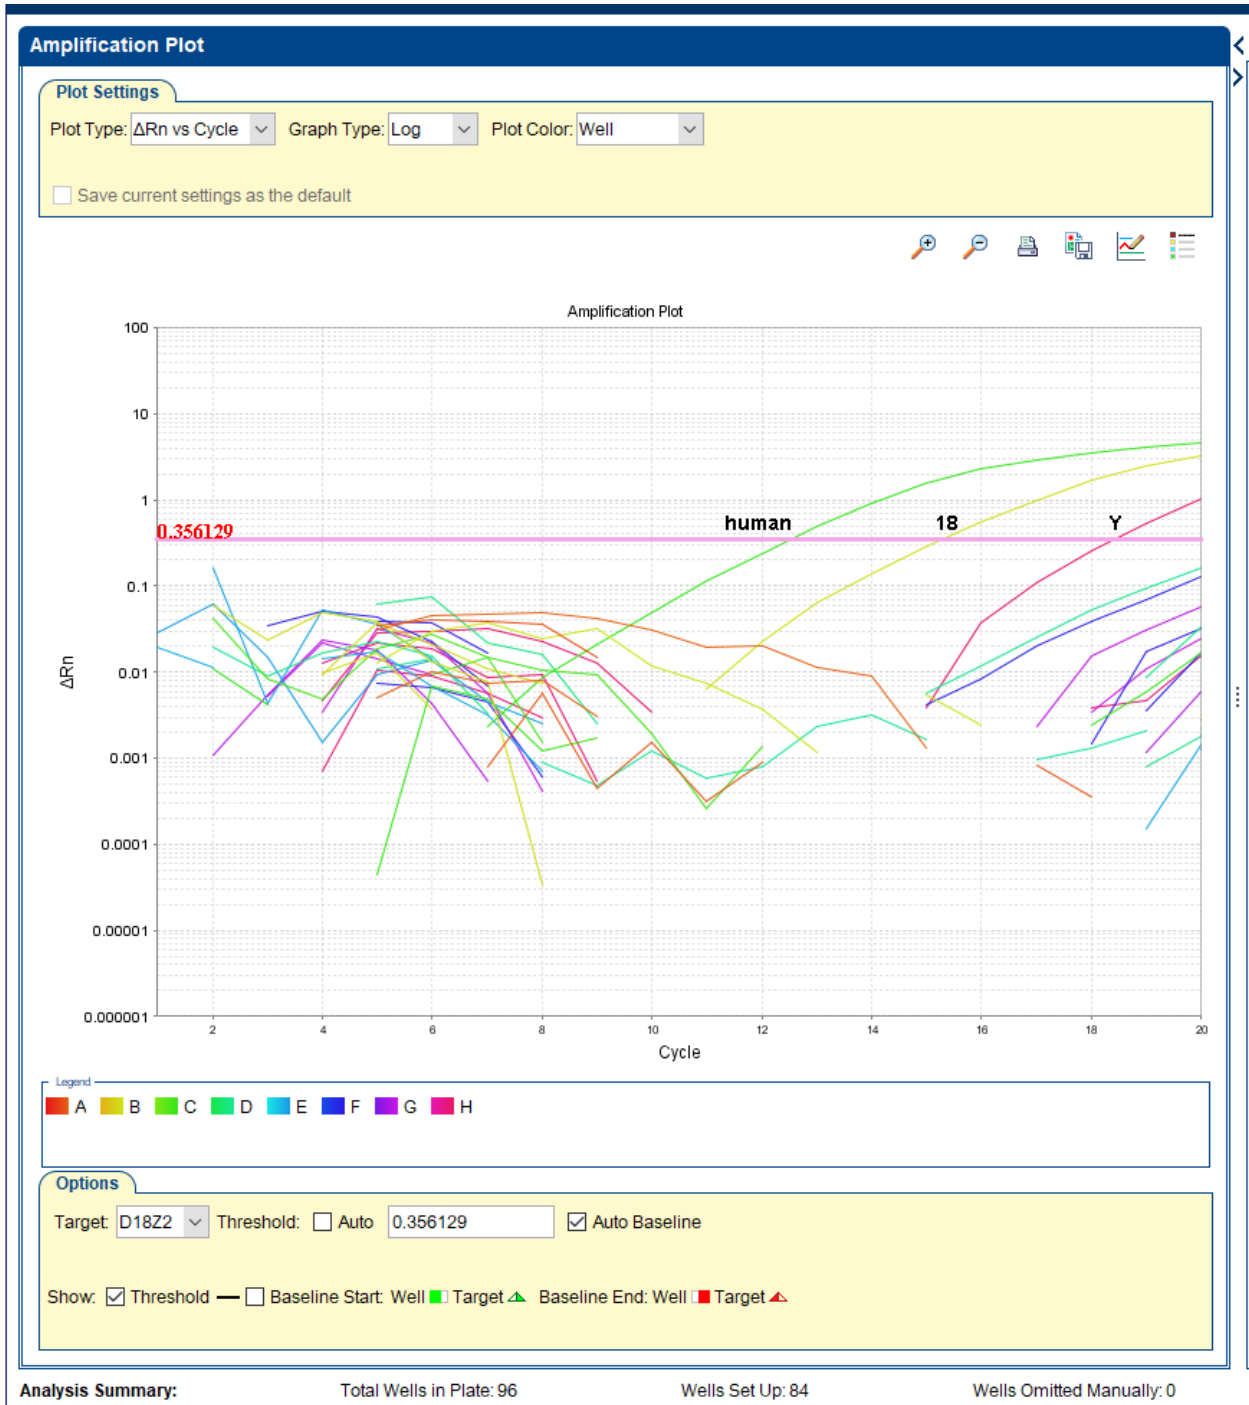

D21Z1/D13Z1

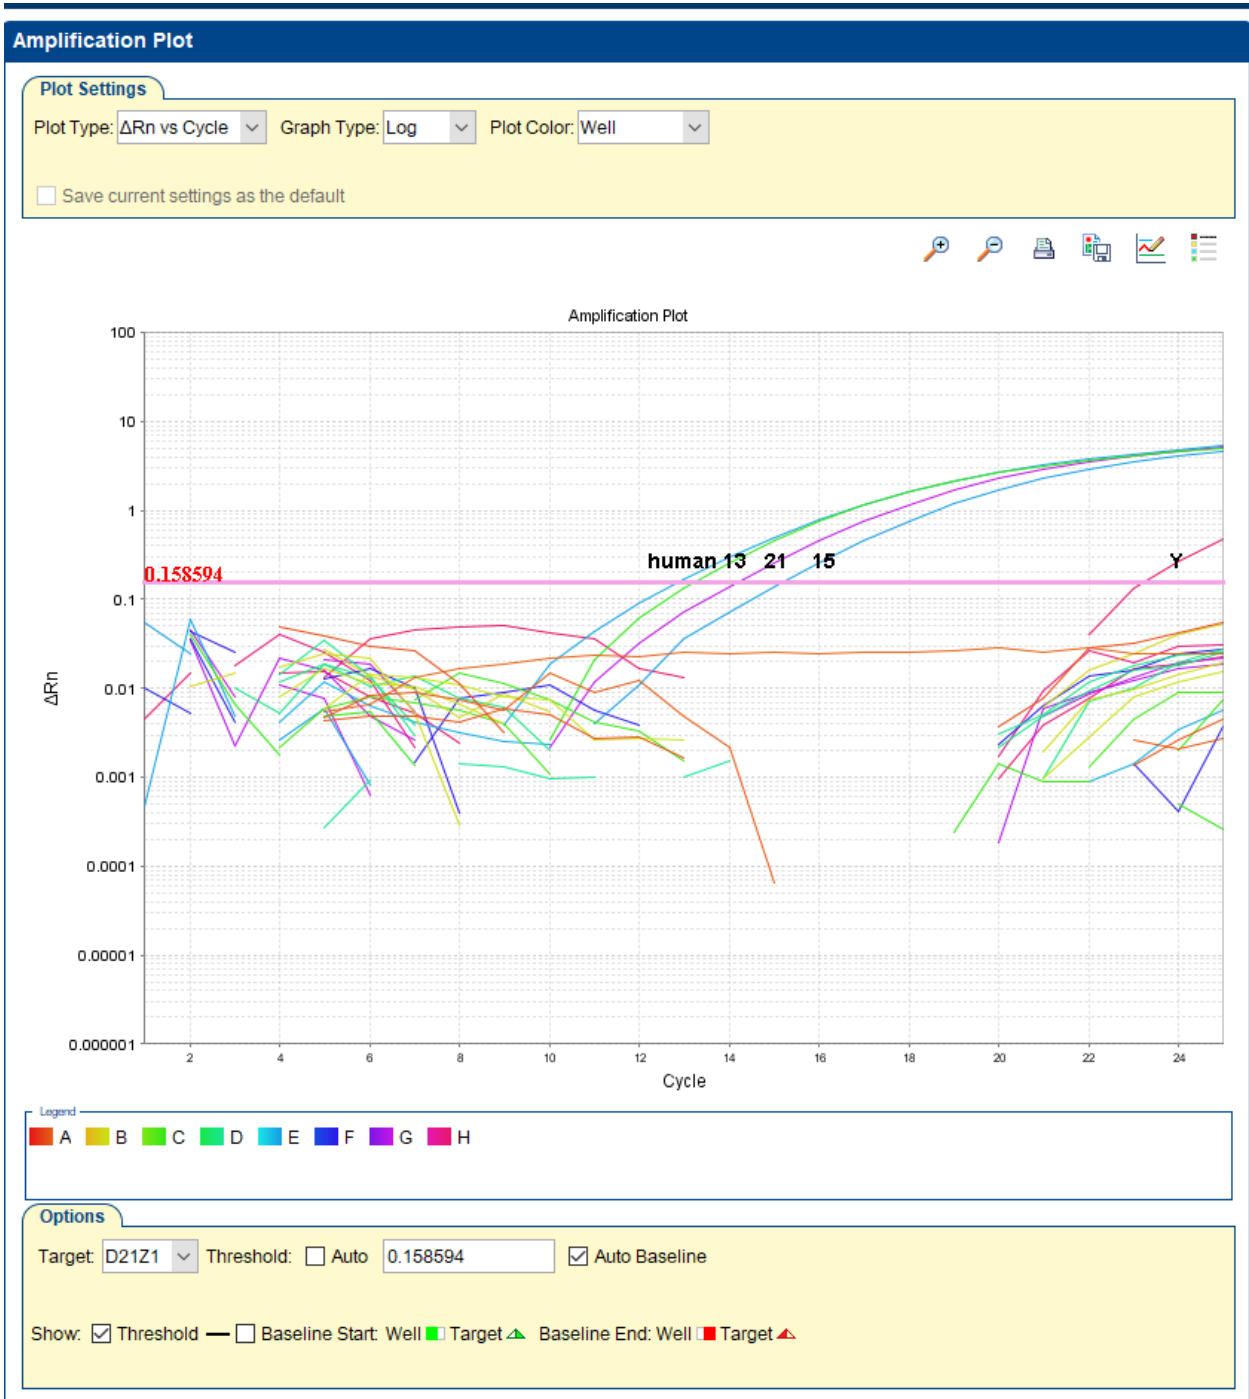

DYZ3

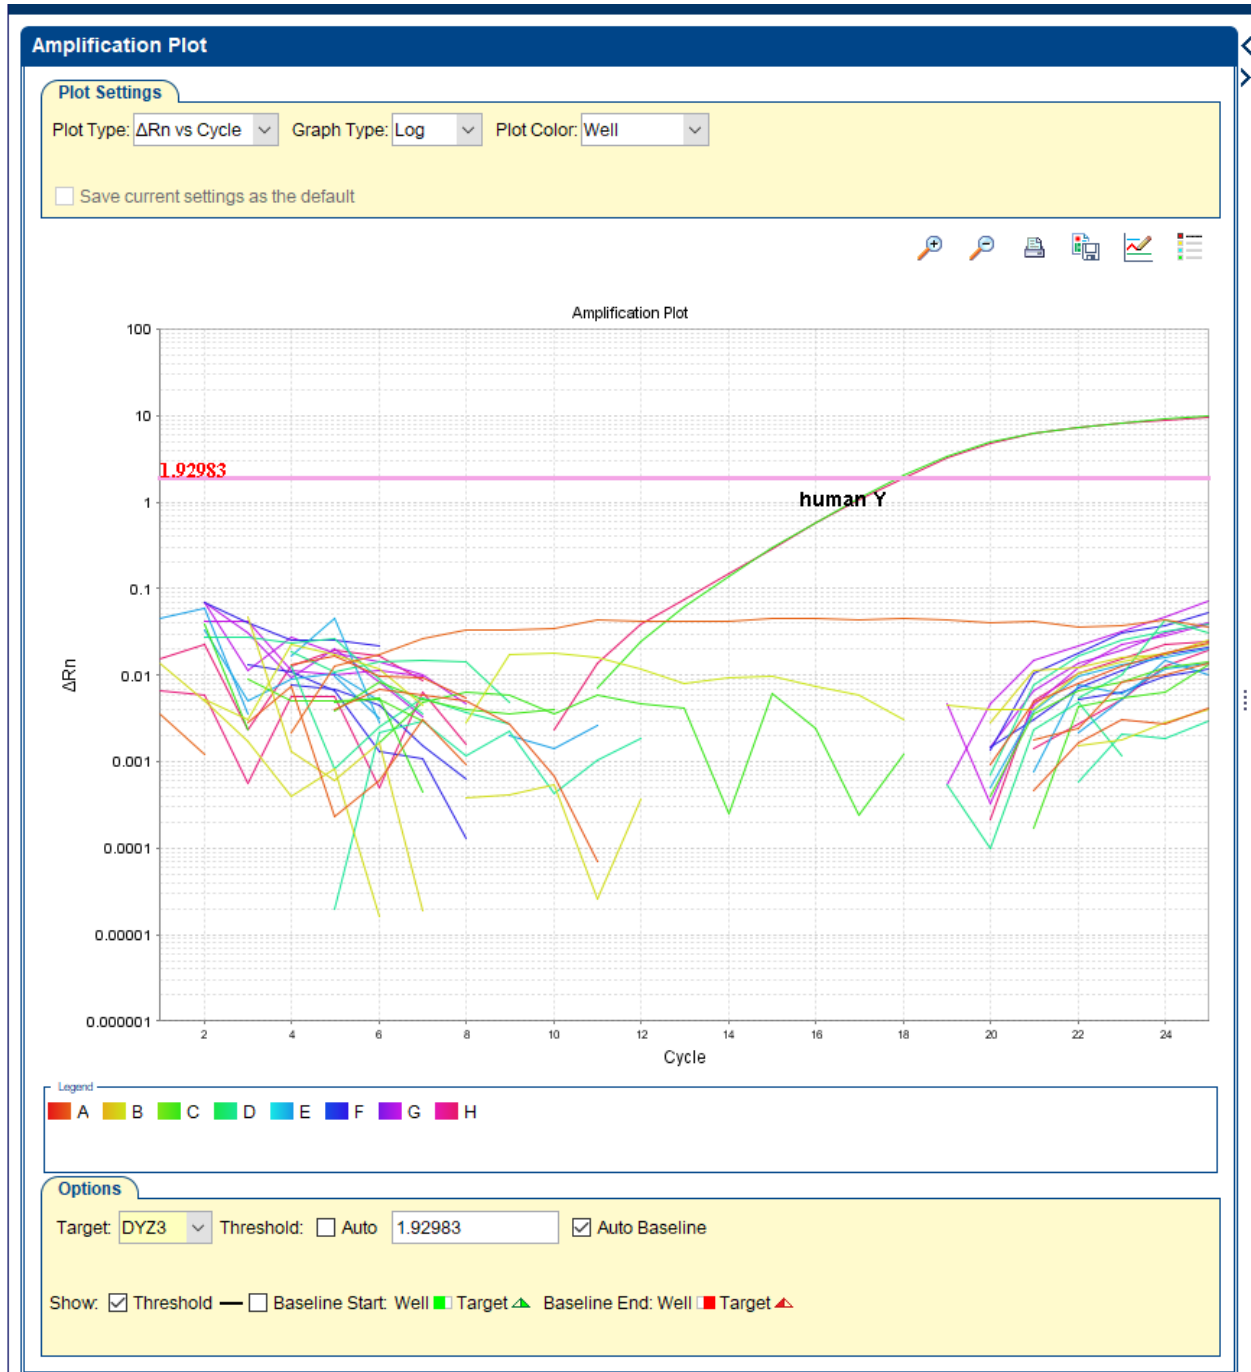

**Figure S2. Detection of centromere arrays in Chr Y.** qPCR assays of centromere arrays were tested in a PCR reaction with DNA isolated from human/rodent hybrid cells that contain single human chromosomes at the conditions reported in Table S2. DNA from mouse or parental hamster cells is included to control for cross-species hybridization of repeats along with human DNA isolated from peripheral blood lymphocytes that served as a positive control. Water was used as a negative control. The specificity of arrays was verified by sequencing. Shown are the qPCR amplification products in arrays that are positive in Chr Y. We detected the following arrays in Chr Y: D1Z7/D5Z2/D19Z3, D4Z1, D5Z1/D19Z2, D7Z1, D9Z4, D13Z1/D21Z1, D17Z1, D18Z1, and D18Z2.
