# Supplementary material for: Rapid molecular assays to study human centromere genomics
Source: PubMed Central journal article supplement — Genome Res. 2017 Dec;27(12):2040–9. doi: 10.1101/gr.219709.116 (PMC5741061; doi:10.1101/gr.219709.116), 2017-12
Supplement: supp_gr.219709.116_Supplemental_Fig_S10.pdf [file supp_gr.219709.116_Supplemental_Fig_S10.pdf]

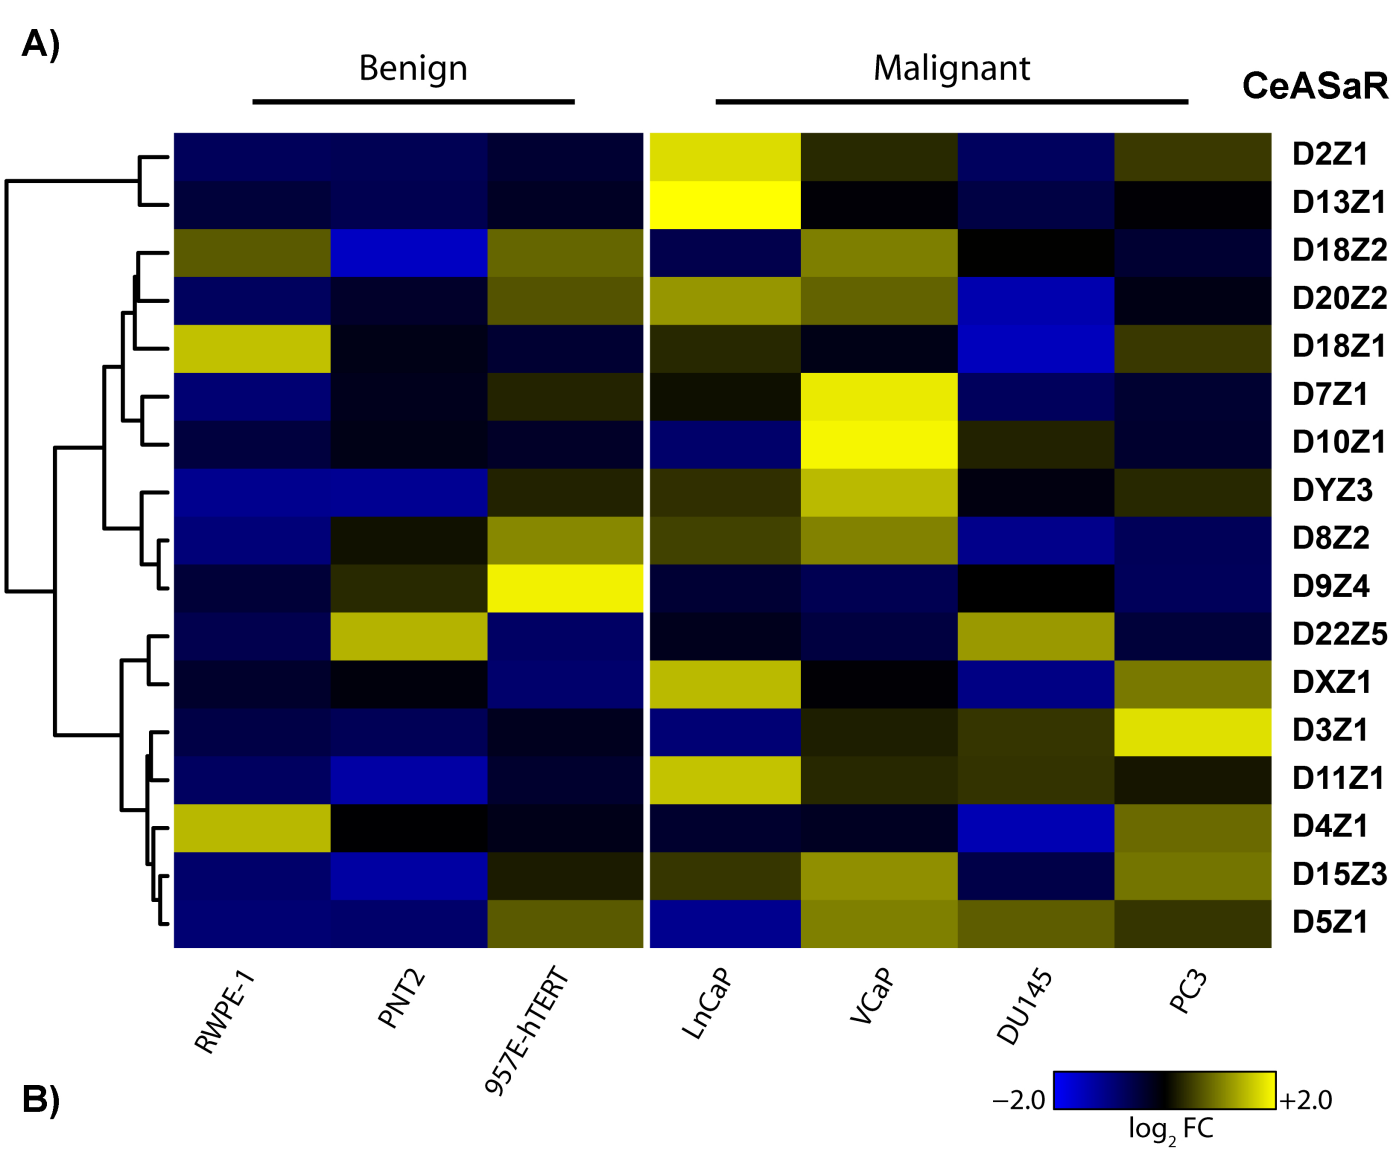

**Figure S10. Centromere Transcript Abundance.** A) Heat map showing Centromere  $\alpha$ -repeat Satellite RNA (CeASaR). We quantitated RNA expression in the prostate epithelial cell lines RWPE-1, PNT2, and 957E-hTERT and the prostate cancer cell lines DU145, LnCaP, PC3, and VCaP using the qPCR assays designed in this study, but including an extra RT step. RNA isolated from these cells was treated with DNase to eliminate DNA contamination. A PCR reaction without the RT step confirmed the elimination of genomic DNA. Quantitative Real-time RT-PCR analysis indicated that specific CeASaRs are transcribed at varying levels. Differences in expression are indicated by log<sub>2</sub> values. B) Levels of RNA expression of alpha repeats of centromere arrays generally, but not always, correlate with the genomic size of the arrays. Statistical analysis using the Pearson correlation coefficient indicated that the log<sub>2</sub> FC values of array transcript levels correlated with the log<sub>2</sub> FC values of genomic alpha repeat content with significant *p* values (left legend). Thus, it would appear that there is differential expression of at least some centromeric sequences.
