# Supplementary material for: Rapid molecular assays to study human centromere genomics
Source: HighWire-hosted journal article supplement (doi:10.1101/gr.219709.116), 2017-11-15
Supplement: Supplemental_Sequences.docx [file Supplemental_Sequences.docx]

**Supplemental Sequence Information**

Identification of CENPB boxes in human centromeric array sequences. CENPB boxes are highlighted in colors. Box 1 (purple), box 2 (green), box 3 (blue), and box 4 (grey) are illustrated. The nucleotide sequences in bold black are necessary for CENPB binding. Boxes having mutations in the bolded bases are not likely able to recruit CENPB (yellow boxes).

>CENPB Box 1

C***TTCGTTGGAA***A***CGG***GA

>CENPB Box 2

C***TTCGTTGGAA***A**C*GG***GT

>CENPB Box 3

T***TTCGTTGGAA***G**C*GG***GA

>CENPB Box 4

T***TTCGTTGGAA***A**C*GG***GA

>D1Z5 Acc No. BX248407.26

CTCATCAAAGCTACATGGAAGCATTCTCAGAAACTGGTTTGTGATGATTGCATTCAAGTCACCGAGTTGAACATTCCCTTTGATGGTTCCGTTTGGAAACACACTTTTGGTAGAATCTTAAAGGGGAGATTTGAACCGCTTTGAGGCCTATGGCAGTAGAGGATATAACTGCACATAAAAACGAGACAGGAGCATTCCCAGGAAACACTTTGTGACGATTGAGTTCAATTCACAGAGCTGAACATTCCTTTGGATGGAGCAGTTTCAAAACACACTTTTTGTAGAATCTGCAAGTGGAGATTTGGACCGCTCTGAGGATTTCATTGGATACGGGAGAAAACTCACCTATGTAAACAGAAGCATTCTCAGAACCTTCTTCGTGATGCTTGCATTCAACTCACAGTGTTCAAACTTTCTCTGATAGTTCAGGTTTTAAACACTCCTTCTGCAGAATCTGCAAGTGGAGATTTGGACCTCTTTGAGGCCTATCGTAGTAAAGGATATAACCTCATCTAAAAACAAGACAGAAGCATTCTCAGAAAATACTTTGTGATGATTGAGTTTAACACACAGAGCTGAGCATATCTTTTGATGGAGCATTTTGAAAACACACCTTTTGTAGAATATGCAAGTGGATTTTGGGACTTCTCTGAGAATTTCGTTGGAAACGGGATAAACCTCACATAACTGAAGAGGAACATTCTCAGAAGTTCTTGGTGACGTTGGCATTCAACTGACAGAGTTGAACCTTCCCTTGTGAGTTCAGGTTGAAA

>D1Z7 D5Z2 D19Z3 Acc No. AJ295044.1

GAATTCCCAGTAACTTCCTTGTGTTGTGTGCATTCAACTCACAGAGTTGAACGTTCCCTTAGACAGAGCAGATTTGAAACACTCTATTTGTGCAATTTGCAAGTGTAGATTTCAAGCGCTTTAAGGTCAATGGCAGAAAAGGAAATATCTTCGTTTCAAAACTAGACAGAATCATTCCCACAAACTGCGTTGTGATGTGTTCGTTCAACTCACAGAGTTTAACCTTTCTGTTCATAGAGCAGTTAGGAAACACTCTGTTTGTAAAGTCTGCAAGTGGATATACAGACCTCCTTGAGCCTTCGTTGGAAACGGGATTTCTTCATATTCTGCTAGACAGAATAATTCTCAGTAACTTCCTTGTGTTGTGTGTATTCAACTCACAGAGTTGAACGATCCTTTACACAGAGCAGACTTGAAACACTCTTTTTATGGAATTTGCAAGTGGAGATTTCAGCCGCTTTGAGGTCAATGGTAGAATAGGAAATATCTTCCTATAGAAACTAGACAGAATGATTCTCAGAAACTCCTTTGTGATGTGTGCGTTCAACTCACAGAGTTTAACCGTTCTGTTCATAGAGCAGTTAGGAAACACTCTGTTTGTAAAGTCTGCAAGTGGATATTCAGACCTCTTTGAGGCCTTCGTTGGAAACGGGATTTCTTCATATTCTGCTAGACAGAAGAATTC

>D2Z1 Acc No. J04773.1

CCTATGGTGAAAAAGGAAATATCTTCCCCTGAAAACTAGACAGAAGCATTCTCAGAATCTTATTTGTGATGTGCGCCCTCAACTAACAGTGTTGAAGCTTTCTTTTGATAGAGCAGTTTTGAAACACTCTTTTCGTAAAATCTGCAAGAGGATATTTTGATAGCTTTGAGGATTTCGTTGGAAACGGGATTGTCTTCATATAAACTCTAGACAGAAGCATTCTCAGAAGCTTCATTGGGATGTTTCAATTGAAGTCACAGTGTTGAACAGTCCCTTTCATAGAGCAGGTTTGAAACACTCTTTTTGTAGTATCTGGAAGTGGACATTTGGAGCGCTCTCAGGACTACGTGGAAAAAGGAAGTATCTTCCAATAAAAGCTAGATAGAAGCAATGTCAGAAACTTTTTCATGATGTATCTACTCAGCTAACAGAGTTGAACCTTTCTTTTGAGAGAGCAGTTTTGAAACACTCTTTTTGTGGAATCTGCAAGTGGATATTTCTCTAGCTTTGAGGATTTCGTTGGAAACGGGATTACATATAAAAAGCAGACAGCAGCATTCCCAGAAACTTCTTTGTGATGTTTGCATTCAAGTCACACAGTTAAACATTCCCTTTCATAGAGCAGGTTTGAAACACTCTTTTTGTAGTATCTGGATGTGGACATTTGGAGCGCTTTCAGGTCTATGGTGAAAAAGGAAATATCTTCCCCTCAAAAGTAGACAGAAGCATTCTCAGAAACTTATGTGTGATGTGCGCCCTCAACTAAGAGTGTTGAACCTTTCTTTTGATAGAGCAGTTTTGAAACACCCTTTTTGTAAAATCTGCAAGAGGATATTTGGATAGCTTTGAGGATTTCGTTGGAAACGGGATTGTCTTCATATAAACTCTAGACAGAAGCATTCTCAGAAGCTTCATTGGGATGTTTCAATTGAAGTCACAGTGTTGAACAGTCCCTTTCATAGAGCAGGTTTGAAACACTCTTTTTGTAGTATCTGGAAGTGGACATTTGGAGAGATCTCAGGAATACGGTGATAAAGGAAATATCTTCCAATAAAAGCTAGATAGAAGCAATGTCAGATACTTTTTCATGATGTATCTACTCAGCTAACAGAGTTGAACCTTTCTTTTGAGAGAGCAGTTTTGAAACACTCTTTTTGTGGAATCTGCAAGTGGATATTTGTCTAGCTTTGAGGATTTCGTTGGAAACGGGATTACATATAAAAAGCAGACAGCAGCATTCCCAGAAACTTCTTTGTGAAGTTTGCATTCAAGTCACAGAGTTGAACATTCCCTTTCATAGAGCAGGTTTGAAACACTCTTTTCGTAGTATCTGGATGTGGACATTTGGAGCGCTTTCAGG

>D3Z1 Acc No. Z12006.1

CTGCAGCTGGATATTTGGACCTCTTTGAGGCCTTCGTAGTAAACGGGATTTCTTCGTGTAATGATAGACAATAGAATTCTCAGTGAATTTTTTTCTGTGTGTGTGTATTCAACTCACAGGGTTGAACCTTCCTTTAGACAGTGCAGATTTGAGACACTTGTCTGTGGAATTTGCAAGGGGAGATTTCAAGCACTTTGAGGCCATTGGTGGAAAAGGAAATATCTTCGTATGAAAACTAGACAGAATCATTCTCAGGAACTACTTTGTGATATGTGCATTCAACTCCCAGAGTTTAACCTTTCTTTTCATAGATGAGTTTGGAAACAGTCAGTTTGTAAATTCTGCAACTGGATATTTGGACCTCTTTGAGGCTTTCGTTGGAAACGGGATTTCTTCACATAATGCTAGACAGAAGAATTCTCAGTAACTTCTTTTGGGATGTATGTATTCAAATCAGAGAGTTGAACCTTCCTTTAGACAGAGCGGATTGGAAACACTCTTTTTGTGGAATTTGCAAGTGGAAAATTCTAGCAGTATGAGGCCAATGGTACAAAAGGAAATATCTTCGTATAAAAACTAGACAGTATCATTCTCAGAAACTGCTTTGTGATGTGTGTATTAAACTCACAGAGTTGAACATTTCTTTGCATAGAGCAGTTTGGAAAGACTTAGTTTGTGCAGTGTGCAAGTGGATATTTGGAACTCTTTGAGGCCTTCGTTGGAAACGGGATTTCTTCTTATAATTTCTTGAAAAAAGAATTCTCAGTAGCTTCTTTGTGTGTGTGTATTCAACTCACAGAGTTGAACCTTCCTTTAGACAGAGCAGATTGGAAACACTCTTTTTGTGGAATTTGCAAGTGGAGAATTCTAGCGCTTTGACGCCAATGGTAGAAAGGAAATATCTTCGTATAAAAACTAGACAGTATCATTCTCAGAAGCTACTTTGTGATGTGTGCGTTCAACTCACAGAGTTTAACCTTTCTTTTCATAGAGCAGTTTGGAAACCCTCTGTTTGTGAAGTCTGCAAGTGGATATTTAAACGTCTTTGAGGCCTTCGTTGGAAACGGGATTTTTTCATATAAACCAGGACAGAAGAATTCTCAGAAACGTCTTGATTGTTATGTGTGCATTCGGCTCACAGAGTTGAACCTTACTTTGGAAAGAGCAGTTTTCTAACACTCTTTTTGTAAAAGTTCCAAGTGAATACTTTGAGTGCTTTGAAGCCTACGGTTGACAACGAAATATCTTCCTGTAAAAACTACAAAGAATCATTCGCAGAAACCACGTTGTGATCTCTGCATTCAACTCACAGAGTTCAACCTTTCTTCCTATAGAGCAGTTATGAAACAGTCTCTTTGTAGAATTTGCAAGGGTGTATTTAGAGGGCATTGAAGCCTACGGTAGAAAAGGAAATATCTTACCATAAAATCTAGTCAGAAGCATTCTCAGCAACTGAGTTGTGATGTTTGCATTCAACTCACAGAGTTCAACATTCCTTTTAATGGAGCGGTTTTGAAACACTCTTTTTGCAGAATCTGCAAGTGGATATTTGGACCTCTTTGAGGCCTTCGTTGGAAACGGGATTTCTTCATGTAATGCCAGACAGAAGAATTCTCAGTGAATTCTTTCTGTGTGTGTGTATTCAACTCACAGAGTTGAACGTTCCTTTAGACAGAGTAGATTGGAAACACTCTTTTTGTGGAATTTTCAGGTGGAGGTATCAAGCGCTTTGAGGCCAATGATAGAAAAGGAAATACCTTCGTATAATAATTAGACGGAATCATTCTCAGAAACCGCTTTGCAATGTGTGCGTTCAACTCACAGTGTTTAACCTTTCTTTTCATACAAGTTGTTTCGAAACACTCTTTTTGCAGAATCTGCAAGTGGATATTTGGACCTCTTTGAAGTCTTCGTTGGAAATGGGATTTCTTCATATAATGCTAGACAGAAGACTTCTCAGTAACTGCTTTTTCTGGTGTGTATTCAACTCTCAGAGTTGAACTTTCCTTTAGAAACAGCAGATTTGAAACTCTCTTTTTGTGGAATTTGCAAGTGGAGATTTCAGAGCTTTGAGGCCAATGGTAGAAAAGGAAATATCTTCGTATGCAAACTAGACAGAATCATTCTCAGAAACTACTTTGGTACGTGTGTGTTCAACTCACAGTGTTTAACCTTTCTTTTCATAGAGCAGTTTGGAAACACTCAGTTTGTAAAGTCAGCAACTGGATATTTGGATGTATTTGAGGCCTTCGTTGGAAACGGGATTTCTTCATATAATGCTAGAATTCAATTCTCAGTAACTTCTTTGGGTTGTGGGTATTCAAGTCACAGAGTTGAAGCTTCCTTTAGGCGGTTGGAAACACTTTTTGTGGAATTTTCAGGGGGAGACTTCAAGCGCTTTGAAGTGAATGGTAGGAAAGGAAATACCTTCGTATAAAAACTAGACGGAGTCATTCTCAGAAACTACTTTGTGATGTTTGCGTTCAACTCACAGAGTTTAACGTTTCTTTTCATAGAGCAGTTTGGAAACACTCTTTTTGCAGAATCTGCAAGTGGATATTTGGACCTCTTTGTGGCCTTCGTTGGAAACGGGATTTTTCATATAATGCTAGACAGAAGAATTCTCAGTAACTTCTTTTTGTGGTGTGTATTCAACTCACAGAGTTGAACCTTCCTTTAGACAGAGCAGATTTGAAACTCTCTTTTTGTGGAATTTGCAAGTGGAGATTTCAAGCGCTTTGAGGCCAACGGCAGAAAAGGAAATATCTTCGTAGAAAAAATAGACGGCATCATTCTCAGAAACTGCTTGGGATGTGTGATTGAACTCACAGTGTTTAACACTTCTTTTCATAGAGCACTTTGGAAACACTCAGGTTGTAATGTCTGCAG

>D4Z1 Acc No. Z12011.1

CTGCAGGTGGATATGTGGATAGCTTTGAAGATTTCGTTGGAAACCGGAATATCTTCCTATAAAATCAAGACAGAAGCATTCTCGGAAACATCTCTGTGATGTTTGCATTCAACTCAGTAGAGTTGAACACGTCCTTTCATAGAGCAGGTTTGAAACACTCTTTCTGCCCTACCTGGAAGCGGACATTTCGAGCGCTTTGAGGCCTATGGTGAAAAAGGAAATATCTTCTCATAAAAACCAGAAAGAAGCATTCTCAGAAACTTCTTTGTGTTGTGTGTACTCAAGTAACAGTGTTGAACCTTCCTTTTGACAGAGCAGTTTTGAAACACTCTTTTGGTAGAATCTGCAAGTGGATATTTGGATAGCTTTGAGGATTTCGTTGGAAACGGGTTATCTTCATATAAAATCCAGACAGGAGCATTCTCAGAAACTTCTTTGTGCTGTATGTCCTCAATTCACAGAGCTGAACCTTTGTTTGGATACAGCATTTTGGAGACATTCCTTTAGTAGAATCTGCAAGTTGATATTTAGATAGCTTTGAAGATTTCGTTGGAAACGGGAATATCTTCATAGAAAATCTAGACGGAAGCATTCTCAGAAACTGCTTTGTGATGTTTGCATTCAAGTCACAGAGTTGAATATTCCCTTTTATAGAGTAGGTTTGAAACACTCTTTCGGCACTACCTGGAAGTGGATATTTCGAGCTCTTTGAGGCCTATGGTTAAAAGGAAATATCTTCCCATAAAAACTAGACAGAAGCCGTCTCAGAAACTTGTTTGTGATGTGTGTATTCAACTACCAGAGTTGAACATTTCTGTTACAGAGCAATTTTAAAACACTCTTTTTGTGGAATCTGAAAGTGGATAATTGGATAGCTTTGTGGATTTCGTTGGAAACGGGATGACGTATAAAATCTAGAGAGAAGCATTCTCAGGAACTTCTTTCTGATGTTTGCATTCAAGTCACAGAATTGAACATTCCTTTTCAGAGTGCAGGTTTGAAACACTCTTTCTGTAGTATCTGGAAGTGGACATTTCAAGCGCTTTCAGGCCTACGGGGAGAAAGGAAATATCTTCAAATAAAAACTAGACAGAAGGATTCTCAGAAACTTATTTGTGATGTGTGTCCTAAACGAACACAGTTGAACCTTTGTTTTGATACAGCATTTTGGAAACACTCCTTTTGTAGGATCTGCAG

>D5Z1 Acc no. M26920.1

AAATTTTCTTTTCATACAGCAGAGTTTGGAAACACTCTGTTTGTAAAGTCTGCACGTGGATAAGTTGTCCACTTAGAGGCATTCGTTGGAAACGGGTTTTTTTCATGTAAGGCTACACAGAAGAATTCCCAGTAACTTCCTTGTGTTGTGTGTATCAACTCAAAGAGTTGAACGATCCTTTACACAGAGCAGACTTCTAACACTCTTTTTGTGGAATTTGCAAGTGGAGATTTCAGCCGCTTTGAAGTCAAAGGTAGAAAAGGAAATATCTTCCTATAAAAACTAGACAGAATGATTCTCAGAAACTCCTTTGTGATGTGTGCGTTCAACTCACAGAGTTTAACCTTTCTTTTCATAGAGCAGTTAGGAAACACTCTGTTTGTAAAGTCTGCAAGTGGATATTCAGACCTCTTTGAGGCCTTCGTGGAACGGGTTTTCATATAAGGCTAGGCAGAGAATTCCCAGTAACTTCCTTGTGTTGTGTGTGTCAACTCACAGAGTTGACTTTCATTTACACAGAGCAGACTTGAAACACTCTTTTTGTAATTGCAAGTGGAGATTTCAAGCGCTTTGAGCAAGGCCGAAAAGGAAATATCTTCGTATAAAAACTAGACAGAATCATTCTCAGAAACTGCTCTGCGATGTGTGCGTTCAACTCTCAGAGTTTAACTTTTCTTTTCATCAGCAGTTTGGAAACACTCTGTTTGTAAAGTCTGCACGTGGATATTTTGACCACTTAGAGGCCTTCGTTGGAAACGGGTTTTTTTCCTGTAAGGCTAGACAGAAGAATTCCCTGTAGCTTCCTTGTGTTGTGTACATTCAACGCACAGAGTTGAACGTTCCCTTAGACAGAGCAGATTTGAAACACTCTTTTTGTGCAATTGGCAAGTGGAGATTTCAGGCGCTTTAAGGTCAATGGCAGAAAAGGAAATATCTTCGTTTCAAAACTAGACAGAATCATTCCCACAAACTGCGTGGTGATGTGTTCGTTCAACTCACAGAGTTTAACCTTTCCTTTCATAGAGCAGTTAGGAAACAGTCTGTTTTTT

>D5Z2 Acc No. M26919.1

GAATTCCCAGTAGCTTCCTTGTGTTGTGAACATTCAACTCACAGAGTTGAACGTTCCCTTAGACAGAGCAGATTTGAACACTCTTTTTGTGCAATTGGCAAGTGGAGATTTCAAGCGCTTTAAGGTCAATGGCAGAAAAGGAAATATCTTCGTTTCAAAACTAGACAGAATCATTCCCACAAACTGCGTTGTGATGTGTTCATTCAACTCACACAGTTTAACCTTTCTTTTCATAGAGCAGTTAGGAAACAGTCTGTTTGTAAATTCTCTAAGTGGATATTCTGACATCTTGTGGCCTTCGTTGGAAACGGGATTTCTTCATATTCTGCTAGACAGAAGAATTC

>D6Z1 Acc No GJ211907.1

AGAATTCTCAAACACTACTATGTGATGTTTGCATGCAAGTCACAGAGTGCAACATTCCTCTTGATAGAGCAGTTGGGAAACACTCCTTTTGTAGAATTTGCAATGGGATATTTGGACTTCTTTGAGGCCTTCATTGGAAACGGGATTTCTTCGTATGAATCTAGACAGAAGAATTCTCAGAAACTTCCTTGTGATGTGTGCATTCAACTCAGCGAGTGGCACTTTCCTTTGGATACAGCAGTTTTGAAACACTGTTTTTGTAGTATTTCCAAGCGGATATTTAGAGCGCCTTGAAGCCTATGCTAGAAATGGAAATATCTCCCCATAAAACCAAGACAGAAGCAATCTCAGAAACTAATGTGTGATGGCTGCATTCCACACACACGGTGGACCATTTCTCTTGATAGAGCAGTTTTGAAACACTCTTTCTGTAGAATCTGCAAGTGGATAATTGGACCTCCTAGAGGCCTTCGTTGGAAACGGGATTTCTTCATCTAAACCTACAGAGAAGAATTCTCAGTAACTTCTTCGGATGTGTGCATTCGACTCACAGAATGGAACATTCCCTTTATAGAGCAGTTTTGAGACACCGTTTTTGTAGAATTACCAAGTGGATATTTAGAGCACTTGGAAGTCTCTGCTAGAAAAGGAAACATCTTCATGTAAAAAGTAGATAGAATCGTTCTCAGAAAGTGCTTAGTGACGTGTGTGTTCAACTCACAGAGTTTAACGTTTCTTTTGATAGAGCGTTTCTGAAACACCCTTCTTGTAGTAGCTGCAAGTGGATATTTGGACCTATTTGAGGCCTTCTTTGTAAACGGGATTTCTTCATGTAACTCTAGATTGAAGAATTCTCAGAAACTCCTTTGTGATGTGTGCATTCAATTCAAAGAGTGAAACCTCCCTTTTCACAGAGCAGTTTTGAAACACTGTTTTTGTAGGATTTCCAAGGGGATATTTATATCGCATTGAGCCTACGGCAGAAAAAGAAACATCTTCCTATAAAAACTAGACAGAATGATTCTCAGAATCTGCTTTGCGATGTGTGCATTCAACCCACAGAGTAAAACTTTTCTTTTGATAGAGCAGTTTTGAAACACTCTTTTTGTAGTATTTGCATGTGTATATTTAGAGCGCGTTGAAGCCCACAGTAGAAAAGGAGATAACTTCACCAAAAACCTAGACGGAAGCAATCTCAGAAACTACTTTGTGATGTGTACATTCAACTCACAGAGTGGAACTTTCCCCTTTACAGAGCAGTGTTGAAACACTCTTTTTGTAGAAACTGCAGGTGGATATTTGGACCTCTTTGAGGCCTTCGTTGGAAACGGGATTTCTTCCTATAACCCTAGACAGAAGAATTTTCAGAAACCTCATTGTGATGTGTGCGTTCACCTCACAGAGTGGAGTCTTCCGTTTGATAGAGAAGTTTTGAAACCCTGTTCTTGTAGTATCTCCAAGTGGATATTTAGACCACTTTGAAGCCTATGATAGAAAAGGAAACATCTTCATGGAAAACATAGATAGAATCATTCTCAGAAACAACTTTGTGATGTGTGCGTTGAACTCACCGTCTTTAACCTTTCTTTTGGTAGAGAAGTTTTGAAACA

>D7Z1 Acc No. AC142529.3

GGGAAATATCTTCAAATAAAAACCAGACAGAATCATTCTCAGAAAATTCTTTGTGATGTGTGCGTTCAACTCACATAGTTTAACCTTTCTTTTCATAGAGCAGTTTGGAAACACTCTGTTTGTAAAGTCTGCAAGTGGATATATGGACCGCATTGAGGCCTTCGTTGGAAACGGGATTTCTTCATTTCATGCTAGACAGAAGAATTCTCAGTAACTTCTTTGTGCTGTGTGTATTCAACTCACAGAGTGGAACGTCCCTTTGCACAGAGCAGATTTGAAACACTCTTTTTGTGGAATTTGCAAGTGGAGATTTCAAGCGATTTGATGCCAACAGTAGAAA

>D7Z2 Acc No. M16037.1

AGCTTCCTTTTGATAGAGCAGTTTTGAAACTCCCTTTTTGCACAATCTGCAGGAGGATATTTGGAGCTCTTTGAGTGCTACATTGGAAACGGGAATATCGTCACCTAAAAACTAGAAAGAAGCATTCTCTGAAACCACTTTGTGATGTGTGCATTCATCTCACAGAGTTGAACCTTCCTTTTGATAGAGCAGTTTTGAAACCCTCTTTTTGTACAATCTGCAAGTGGATATTTGGAGCAAATTGAAGCCTTCTTTGGAAATGGGAATATCTTAATCTAAAAATTAGGCAGAGCATTCTCAGAAACTACTTTGTGATGTGTGCATTCAACTCACAGAATTGAACCTTCCTTTTGATACAGCAGTTTTGAAACACTCTTTGTTTAGAATCTGCAAGTGGATATTTGGAGCACATTTATGCCTGTGGTAGAAAAGGAAATATCTTCACATAAAAACTAGACAGAAGCATTCTCAGAAACGACTTTGTGATGTGTGCATTCTACTCCCATAGTTGAAAATTTCTTTTGATAGAGCAGTCTGGAAACACTCTGTTTCTAAAATCTGCAAATGGACATTTGGTGCGCTTTGAACGTTATGATGGAAAAGGGAATATCTTCGCATTAAAACTAGACAGAAGCATTCTCAGAAACTTCTTTGTGATGTGTGCATTCAACTCCCAGGTTGAACCTTTCTTTTGTTAGAGCAGTTATGAAACACTCCTTTTGTAGAATCTGCAGGCGGATATTTAGTACTCTTTGAAGCATTCTTTGGAAACGAGAATATCTTCACCTAAAACCTAGACAGAAGCATTCTCAGAAACATCTTTATGATGTGTCCATTCATCTCACAGAGTTGATAGAACATTTTGATAGAGCAGTTTTGAAACACTCCTTTTAAAGAATCTGCCAGTTCATATGTGCAGTGCTTTGAGGCTTATGGTAGAAAAGGAAATATCTTCATATAAAAACTAGACAGAAGCATTCTCAGAAACGACTTTGTGATGTGTGCATTCTACTCGCAAAGTTGAAACTTTCTTTTGATAGAGCAGTTTTGAAACCTTCTTTCCAAAGAATCTTCAAGTGGGCATTTCGAGGGCTTTAGGACCATTGCGGATAAGGAAATATCTTCCCATAAGAAGTAGACAGAACTATAATCAGAAACTTCATTTTGATGTGTACATTCAACTCACAAAGCAGACCCTTACTTTTGATAGAGAAGTTTTGAAACACTCTTTTTGTAGAATCTGCAAATTGATGTTTGGAGCGCTTTCAGGCCTCTGGTAGAAAAGGAAATACCTTCACATAAAAACTAGACAGAAGCATTCTCAGAAACGACTTTGTGATGTGTGTATTCTACTCCCATAGAAGAACATTTCTTTTGATAGAGCCGCCTGGAAACAATCTTCTTGTAGAATCTGCAAGTGGACATTTGGAGCTTTTTGAAGGCTGTGGTTGAAAAGGTAATATCTTCACCTAAAAACTAAATGGAAGCATTCTCCCAAACGTTTTTGTGATGTGTGCGTTCAACTCACAGAGCTGAACCTTCCTTTTCTTAGACCAGTTTTGAATCACTCTTTTTGTAGAATCCGCATTTAGATATTTGGAGCGCTTTGAAGACTTCATTGGAATCGCGAATACCTTCACATAAAAACTAGACAGAACCATTCTCAGAAACCCCTTTGAGATGTGTGCATTCAACTCACAGAGCTGAACCTTTCTTTTGATAGTGCAGTTTTGAAACATTCTTTTTAAAAAATCTGCAGTTGGACATTTGGAGCTCTTTTAGGCTATCGGTTGAAAAGGAAGTATCTTCACATTAAAACAAGACAGAAGCATTCTCAGAAACTCCTTTATGATGTCTGCATTCAACTCACAGAGTTGAACCTTCCTTTTGATAGAGCAGTTTTGAAACACTCTTTCTGTAGAATCTGGAGGCGGATATTAGGGTGCTTTGAAGCCTTCTTGGGAAACAGGATTATCTTCACATAAAAATTAGACAGAAGCATTCTCAGAAACTTCTTTGTGATGTGTGCATTCAACTCACAGCGTTGAAACTTCCTTTTGCTAGAGCAGTTTTGAAACCCTCTTTTTGAAGAATCTGAAAGTGCATAATTGCAGCACTTTGAGGCTTAAGGTAGAAAAGGAAATATCTTCATATAAAAACTAGACAGAAGCATTCTCAGAAACTACTTTGTGATGTATACATTCTACTCACATAGTTGAAATTTCCTTCTGATACTGCAGTTTTGAAACCGTCTTTTTGAGGAATCTTCCAGTGGGCATTTTGAGGGCTTTGGGGGCTATTGTGGATAAGGAAATATCTTCACATGAAAAGTAGACAGAAGTGTCCTCAGAAACTTCATTTTGATGGGTGCATTCAACTAACAAGGTAAAACTTACTTTATTGAGCAGTTTTGAAACAGTCTTTTTGTAGACTCTGCAGGTGGATATTTGGAACGCTTTGAAGCCTTCGTTGGAAACGGGAATATCTTCCCCTTGAAACTAGACAGAAGCATTCTCAGAAACTTCTTTGTGATGTGGGCATTGAACTCACGGAGCTGAACCTTCCTTTGGATTGAGCAGTTTTGAAAAACTCTTCCTTTATAATCTGCAGGTGGATATTTGGAGTGCTTTGAAGCCTTCTTTGGAAACGGGAGTATCGTCACATAAAAATAGACAGAAGTATTCCCAGAAACTTCTTTGTGATTTGTGCATTCAACTCACAGAGTTGA

>D8Z2 Acc No. M64779.1

AAGCTTTGAAGATTTCGTTGGAAACGGGAATATCTTCAAATAAAATCTAGCCAGAAGCATTCTAAGAAACATCTTAGGGATGTTTACATTCAAGTCACAGAGTTGAACATTCCCTTTCACAGAGCAGGTTTGAAACAATCTTCTCGTACTATCTGGCAGTGGACATTTTGAGCTCCTTGGGGCCTATGCTGAAAAAGGAAATATCTTCCGACAAAAACTAGACAGAAGCATTCGCAGAATCACGTTTGTGATGTGTGCACTCAACTGTCAGAATTGAACCTTGGTTTGGACAGAGCACTTTTGAAACACTCTTTTTGTAGAATCTGCAGGTGGATATTTGGCTAGCTTTGAGGATTTCGTTGGAAACGGTAATGTCTTCAAAGAAAATCTAGACAGAAGCATTCTCAGAAACAGCGTCGTGATGTTTGCAATCAAGTCACAGAGTTGAACCTTCCGTTTCATAGAGCAGGTTGGAAACACTCTTTTTGTAGTATCTGGAAGTGGACATTTGGAGGGCTTTGTAGCCTATCTGGAAAAAGGAAATATCTTCCCATGAATGCGAGATAGAAGTAATCTCAGAAACATGTTTATGCTGTATCTACTCAACTAACTGTGCTGAACATTTCTATTGATAGAGCAGTTTTGAGACACTCTTCTTTTGGAATCTGCAAGTGGATATTTGGATAGATTTGAGGATTTCGTTGGAAACGGGATTATATATAAAAAGTAGACAGCAGCATTCTCAGAAACTTCTTTGTGATGTTTGCATCCAGCTCTCAGAGTTGAACATTCCCTTTCATAGAGTAGGTTTGAAACCCTCTTTTTATAGTGTCTGGAAGCGGGCATTTGGAGCGCTTTCAGGCCTATGCTTAAAAAGGAAATATCTACCTACAGAAACTAGACAGAAGCATTCTGAGAATCACGTTTGTGATGTGGGTACTCAACTAACAGTGTTGATCCATTCTTTTGATACAGCAGTTTTGAACCACACTTTTTGTAGAATCTGCAAGAGGATATTTGGATAGCTGTGAGGATTTCGTTGGAAACGGGAATGTCTTCAAAGAAAATCTAGACAGAAGCATTCTCAGAAACACCTTCGTGATGTTTGCAATCAAGTCACAGAGTTGAACCTTCCGTTTCATAGAGCAGGTTGGAAACACTCTTATTGTAGTATCTGGAAGTGGACATTTGGAGCGCTTTCAGGCCTATGGTGAAAAAGGAAATATCTTCCCATAAAAACGACATAGAAGCTATCTCAGGAACTTGTTTATGATGCATCTAATCAACTAACAGTGTTGAAGGTTTGTACTGACAGAGCAGTTTGAAACACTCTTTTTTTGGAATCTGCAAGTGGATATTTGGATCGCTTTGAGGATTTCGTTGGAAACGGGATGCAATATAAAACGTACACAGCAGCATACTCAGAAAATACTTTGCCATATTTCCATTCAAGTCACAGAGTGGAACATTGGGATTCATAGAGCAGGTTTGAAACACTCTTTTTGGAGTATCTGGAAGTGGACATTTGGAGCGCTTTCTGAACTATGGTGAAAAAGGAAATATCTTCCAATGAAAACAAGACAGAAGCATTCTGAGAAACTTATTTGTGATGTGTGTCCTCAACAAACGGACTTGAACCTTTCGTTTCATGCAGTACTTCTGGAACACTCTTTTTGAAGATTCTGCATGCGGATATTTGGATAGCTTTGAGGATTTCGTTGGAAACGGGCTTACATGTAAAAATTAGACAGCAGCATTCTCAGAAACTTCTTTGTGGTGTCTGCATTCAAGTCACAGAATTGAACTTCCCCTCACATAGAGCAGTTGTGCAGCACTCTATTTGTAGTATCTGGAAGTGGACATTTGGAGGGCTTTGTAGCCTATCTGGAAAAAGGAAATATCTTCCCATGAATGCGAGATAGAAGTAATCTCAGAAACATGTTTATGCTGTATCTACTCAACTAACTGTGCTGAACATTTCTATTGATAGAGCAGTTTTGAGACACTCTTCTTTTGGAATCTGCAAGTGGATATTTGGATAGATTTGAGGATTTCGTTGGAAACGGGATTATATATCAAAAGTAGACAGCAGCATTCTCAGAAACTTCTTTGTGATGTTTGCATCCAGCTCTCAGAGTTGAACATTCCCTTTCATAGAGTAGGTTTGAATCCCTCTTTTTATAGTGTCTGGAAGCGGGCATTTGGAGCGCTTTCAGGCCTATGCTGAAAAAGGAAATATCTACCTATAGAAACTAGACAGAAGCATTCTGAGAATCACGTTTGTGATGTGGGTACTCAACTAACAGTGTTGATCCATTCTTTTGATACAGCAGTTTTGAACCACACTTTTTGTAGAATCTGCAAGTGGATATTTGGATAGCTGTGAGGATTTCGTTGGAAACGGGAATGTCTTCATAGAAAATTTAGACAGAAGCATTCTCAGAACCTTGATTGTGATGTGTGTTCTCCACTAACAGAGTTGAACCTTTCTTTTGACAGAACTGTTCTGAAACATTCTTTTTATAGAATCTGGAAGTCGATATTTGGAAAGCTT

>D9Z4 Acc No. M64320.1

CCTATGATGAAAAAGGTAATATCTTCCCATAAAAACTAGCAGAAGCATTCTCAGAACTGTTTGTGATGTGTGTATTCAACTAACAGAGATGAACCTTTCTTTTTACAGAGCAGTTTGAACACTCTTTTGTGGAATCTGAAAGTGGATATTTGGATAGCTTTGCGGATTTCGTTGGAAACGGGATTACATATAAAATCTAGGGAGAAGCATTCTCAGGAACTTCTTTGTGATGTTTGCATTCAAGTCACAGAACTGAACATTCCCTTTCATAGAGCAGGTTTGAAACACTCTTTCTGTAGTATCTGCAAGCGGACGTTTTAAGCGCTTTCAGG

>D10Z1 Acc No. X63622.1

TGCAGGTGGATAATTGGCCCTCTTTGAGCCCTTCGTTGGAAACGGGATTTCCTCATATAATGCTAGACAGAAGAATTCTCAGTAACTTCTTTGTGTTGTTTGTATTCAACTCAGAGATTTGAACCTTCCTTTAGAGAGAGCAGATTTGAAACACTGTGTTTTTGGAATTTGCAAGTGCAGATTTCAAGCGCTTCTATGCCTATGGCAGAAAAGGAAATATCTTCGTATAAAAACTACACAGAATCATTCTCAACAACTACTTTGTGATGTGTGCGTTCAACTCACAGAGTTAAACCTTCCTTTTCATTGAGCAGTTTGGAAACACTCTGTTTGTAAAGCCTGCAAGTGCTTTTTTGGACTTCATTGAGGCCTTCGTTGGAAACGGGATTTCATCATATAATGCTAGAGAGAAGAATTCTCAGTCACTTCTTTGTGTTGTGTGTATTCAAGTCACAGAGTTGAACCTTCCTTTAGACAGAGCAGTTTTGAAAAATTCTTTCTGTGGAATTTGCAAGTAGAGATTTCAAGCGATTTGAGGCTAATCTTTGAAATTGAAATATCTTCGTGTAAAAACGACACAGAAGCATTCTCAGAAACTGCTTTGTCATCTGTGCGTTCAGTTCACAGAGTTTCACCTTTCTCTTCATAGAGCAGTTTGGAAAGACTGTCTGTAAAGTCTGCAAGTGATTAGTTAGACCCCTTTGAGGCCTTCGTTGGAAGCGGGATTTCTCATTTACTGCTAGACAGAAGAATTCTCAGTAAATCCTTTGTGTTGTGTGTATTCAACTCACAGAGTGGAACCTTCCTTTATTCAGAGCAGTTTTGAAAAACACTTTTTGTGGAATTTGCAAGTGGAGATTTCAAGCGATTTGACGCCAATCTTAGACATGGAAATATCTTCATATTAAAAGT

>D11Z1 Acc No. M21452.1

CTAGAATCCCCAAGTGGACATTTGGAGGGCTTTGAGGCCTGTGGTGGAAAAGGAAATATCTTCACATAAAACCTAGATAGAAGCATTCTCAGAAACTACTTTGGGATGATTGCATTAGACTCACAGACTTGAACCTTCCAATGGATAGAGCAGTTTGTAAACACTCTTTTTGAGAATCTGTGATTGCTGATTTGGACTGCATTGAGGCCTACGGTACTAATGGAAATAACTTCATCTAAAATCCAAACGGAAGCATTCACAGAAAATTCTTTGTGATGATTGGATTGAACTAAGAGAGCTGAACATTCCTTTAGATGGCGCAGTTTCCAAACACACTTTCTGTAGAATCTGCACGTGGATATTTGGACTTCTCTGAGGATTTCGTTGGAAATGGGATAAACTTCCCAGAACTACACGGAAGCATTCTCAGAAACTTCTTTGTCACGTTTGCATTCAACTCACAGAGTTGAACCTTCTTTTCATAGTTCAGCTTTCAAACACTCTATTTGTAGAATCTGCAAGTGGATATTTGGACACTTTGTGGCCTTCCTTCGAAACGGGTATATCTTCACATCAAACCTAGACAGAAACATTCTCAGAATGTTTCCTGTGATGACTGCATTCAACTCACAGAGTTGAACAATCCTGCTGATGGAGCAGTTTTGAAACGCTCTTTCTTTGGATTCTGCAAGTGGATATGTGGACCTCTTTGAAGATTTCCTTGGAAACGGGTTCCTCTTCACATAAAAAGTAAACAGAAGCATTCTCAGAAACTGCTTTGTGATGTTTGTGTTCCATTTCAAGAATTGAAATTTCCTGTTGACAGAGCAGCTCTGAAACCCTCTTTTT

>D12Z3 Acc No. M28221.1

AAGCTTTCTTTTCATAGAGTAGTTTGGAAACACTCTGTCTGTAAAGTCTGCAAGCAGATATTTGGACCTCTTTGGGGCCTTCGTTGGAAACGGGATTTCTTCATAGAACGCTAGAAAGAAGAATACTGAGTAAGTTCTTTGTGTTGCCTCTATTCAACTCACAGAGGTGAACTGTCCTTTAGACAGAGCAGATGTGAAACCCTCTTTTTGTGATATTTGCAGGTGGAGATTTCAAGCGCTTTTAGGCCAAATGTAGAAAAGGAAATATCTTCGTATAAAAACTAGACAGAATCATTCTCAGAAACTACTTTGTGATGTGTGCGTTCAATTCACAGAGATAACCTTTCTTTTGATGAAGGAGTTTGGAGACACTGTGTTTGTAAAGTCTGCAAGTGGATATTTGGACCTCTTTGAGGCCTTCGTTGGAAACGGGATTTCTTCCTGTAATGTTCGACAGAAGAATTCTCAGTAACTTATTTGTGGTGTGTGTATTCAACTCACAGAGTTGAACCTTCCTTTAGACAGAGCAGATTTGAAACACCCTATTTGTGCAGTTTCCAGTTGGAGATTTCAATCACTTTGAGACCAAATGTACAAAAGGAAACATCTTCGTATAAAAACTAGACAGAATCATTCTCAGAAACTACTTTGTGATGTGTGCGTTCAACTCAAGGTGTTTAAGCTT

>D13Z1 Acc No. D29750.1

AATTCAAATAAAAGGTAGACAGCAGCATTCTCAGAAATTTCTTTCTGATGTCTGCATTCAACTCATAGAGTTGAAGATTGCCTTTCATAGAGCAGGTTTGAAACACTCTTTCTGGAGTATCTGGATGTGGACATTTGGAGCGCTTTGATGCCTACGGTGGAAAAGTAAATATCTTCCATAAAAACGAGACAGAAGGATTCTCAGAAACAAGTTTGTGATGTGTGTACTCAGCTAACAGAGTGGAACCTTTCTTTTTACAGAGCAGCTTTGAAACTCTATTTTTGTGGATTCTGCAAATTGATATTTAGATTGCTTTAACGATATCGTTGGAAAAGGGAATATCGTCATACAAAATCTAGACAGAAGCATTCTCACAAACTTCTTTGTGATGTGTGTCCTCAACTAACAGAGTTGAACCTTTCTTTTGATGCAGCAGTTTGGAAACACTCTTTTTGTAGAAACTGTAAGTGGATATTTGGATAGCTCTAACGATTTCGTTGGAAACGGGAATATCATCATCTAAAATCTAGACAGAAGCACTATTAGAAACTACTTGGTGATATCTGCATTCAAGTCACAGAGTTGAACATTCCCTTACTTTGAGCACGTTTGAAACACTCTTTTGGAAGAATCTGGAAGTGGACATTTGGAGCGCTTTGACTGCCTTTGTTGAAAAGGAAACGTCTTCCAATAAAAGCCAGACAGAAGCATTCTCAGAAACTTGTTCGTGATGTGTGTACTCAACTAAAAGAGTTGAACCTTTCTATTGATAGAGCAGTTTTGAAACACTCTTTTTGTGGATTCTGCAAGTGGATATTTGGATTGCTTTGAGGATTTCGTTGGAAGCGGGAATTCGTATAAAAACTAGACAGCAGCATTCCCAGAAATTTCTTTCGGATATTTCCATTCAACTCATAGAGATGAACATGGCCTTTCATAGAGCAGGTTTGAAACACTCTTTTTGTAGTTTGTGGAAGTGGACATTTCGATCGCCTTGACGCCTACGGTGAAAAAGGAAATATCTTCCCATAAAAATAGACAGAAGCATTCTCAGAAACTTGTTGGTGATATGTGTCTCAACTAACAGAGTTGAACTTTGCCATTGATAGAGAGCAGTTTTGAAACACTCTTTTTGTGGAATCTGCAAGTGGATATTTGGATAGCTTGGAGGATTTCGTTGGAAGCGGGAATTCAAATAAAAGGTAGACAGCAGCATTCTCAGAAATTTCTTTCTGATGACTGCATTCAACTCATAGAGTTGAACATTCCCTTTCATAGAGCAGGTTTGAAACACTCTTTCTGGAGTATCTGGATGTGGACATTTGGAGCGCTTTGATGCCTATGGTGAAAAAGTAAATATCTTCCCATAAAAACGAGACAGAAGGATTCTGAGAAACAAGTTTGTGATGTGTGTACTCAGCTAACAGAGTGGAACCTCTCTTTTGATGCAGCAGTTTGGAAACACTCTTTTTGTAGAAACTGTAAGTGGATATTTGGATAGCTCTAATGATTTCGTTGGAAACGGGAATATCATCATCTAAAATCTAGACAGAAGCCCTCTCAGAAACTACTTTGTGATATCTGCATTCAAGTCACAGAGTTGAACATTCGCTTTCTTAGAGCACGTTGGAAACACTCTTTTTGTAGTGTCTGGAAGTGGACATTTGGAGCGCTTTGATGCCTTTGGTGAAAAAGGGAATGTCTTCCCATAAAAACTAGACAGAAGCATTCTCAGAAACTTGTTTTTGATGTGTGTACCCAGCCAAAGGAGTTGAACATTTCTATTGATAGAGCAGTTTTGAAACACTCTTTTTGTGGAAAATGCAGGTGGATATTTGGATAGCTTGGAGGATTTCGTTGGAAGCGGGA

>D13Z2 Acc No. GJ211955.2

AGCATTCTGAGAAATTACTTTGTGATGTGTGCATTCATCACAAAGAGTTGAACCTTTCTTTTGGTTGAGCAGTTTTGAAGCACTCTTTTTGTAGAATCTGTAAGTGGATATTTGGAGTTCTTTGAGGCTTATGGTGGTAAAGGAAATATCTTCACACAAAAACTACACAGAACCATTCTGAAATACCTCTTTGTGATGCTTGCATTCATCTCACATAGTTGAACCATTCTTTTTATTGAGCAGTTTTGAAACAATCTCCTTGTAGAATGTGCAAGTGGATATTTGGAATGCTTTGATGAGTATGGTGGAAAATGAAAAATCTTCACATAAAAACTAGACAGAATTACTCTGAGAAACTTCTTTGTGATGTGCACATTCATCTCACAAATTTGAAAATTTCTTTTGATTGAGCAGTTTTGAAACGCTCTTTTTCTAGAATCTGCCAGTGGTTATTTGGAGTGCTTTGAGTCCTATGGTGGAGAAGGAAATATCCTCACATAAAAACTAGAGAGAAGCATTCTGAGAAACTTCTTTCTGATGTGTGCATACATCTCACGGAGTTGAAACTTTCTATTGATTTAGCATTTTTTATACACTTTTTGTAGGATCTGCAGTTGCTATTTGGAGCCCTTTGGGGCCAATGGTGGAAAAGTACTATCTTCTCATAAAAACTAGACAGAAGCATTCTGAGAAACTTCTTGGTGATGTGTGCATTCATCTCACAGTAGTTGAACCTTTCTTTTGATTGAGCAGTTTTGAAACGCTCTTTTCGTTGAATCTGCAAGTGCATATTTAGAGTGCTTTGAGGCACGTGGTGGAAAAGGAAATATCTTCACATAAACACTAGACAGAAGCATTCTGAGAAATGTCTTTGTGATGTGTCCATTCACTTCACAGAGTTGAAACTTTCTTTTCATTGAGCAGTTTTGAAACACTCTTTTTATAGAATATGCAAGTGGATATTTGGAGCGTTTTGGAGAGAATGGTGGAAATGGAAATATCTTCATATAAAAACTACGGAGAAGCATTCGGAGAAACGGCTTTGTTATGTGTGACTTCAGCTCACACAGTTGAACCTTTCTTTTGATTGAGCATTTTTGATTCCCTCTTTTTGTAGAATCTGCAAGTGGATATTTGGAGAGCTTTAGGGCCTACGGTGGAAAAGGAAATATCTTCACATAAAAACTACACAAAAGCATTCTGAGAAACTTCTTTCTGATGTGTGCATACAACTCACAGAGTCGAAACTTTCTTTTGATTGTGCAGTTTTGAAACACTTCTTTTGTAGAATCTGCAAGTGGATATTCAGAGGGCTTTGTGGAGTATAGTGGAAAAGGAAATAACTTTGGATAAAAGCTAGACAGCAGAATTCTGAGAAACTTCTTTGTGATGTGTGCATTCAACGTACAGAGTTGAACCTTTCTTTAGATTTGGCAGTTTTGAAACACTACTTTTGTAATATCTGCAAGTGGATATTTGGTGACCATTGCAGCCTATGGTGGAAAGGCAAATATCTTCACATAAAAACTAGACCAAGGCATTCTGAGAATCTTCTTTGTGATGTGTGCATTCTTCTCACACAGTTCAACTTTTCTTTTGATTCAGCAGTTTGGAAACAGTATTTTTCTACAATCTGCAAAGGGATACTTCTTAGCCGATTTAGGCCTATGGTGAATTAGGAAATATCTTCACATAAAAAATAAACAGAAACTTTCTGAGAAACTTCTTTGGGATGTGTGTTTTCATCTCA

>D13Z3 Acc No. GJ211961.2

AACATGATGAGAAACTGCTTTGTGATGCGTGCATTCATCACCAGTAGTTGAGTTTCTCTTTTGATTGAACAGTTTTGAAACACTCTTTCTGAAGAATCTGAAAGGGATATTTGGAGCGCTTTGCAGCCTATGGTGAAAAAGGAAATATCTTCACATAAAAGCTAGACAGAAGCATTCTAAGAAAGTGCTTTGTGACGTGTGCATTCATCTCACAGTGTTGAAGCTTTCTTTTGATTGAGCAGTTTTGAAACACTCTTATTGTAGAATCTGCAAGTGGATATTTGGAGAGTATGAGGCCACTGGTGGAAAAGCAAATATCTTCACATCAAAACTAGACAGAATCATTATAAGTAATCTCTTTGAGATGCGTGCATTCAACTCACAGAGTTGGACATTTCCTTTGATTGAGCAGTGTGGAAACAGTCTTTTTGCAGTATCTGCAAACGGATATTTGGAGCACTTTCAGGCCTATAGTAGGAAAGGAAATATCTTCACATAAAAACTACACAGAAAATTACTGAGAAACTTCTTAATGATGTGTGCATTCATCTCACAGAGTTGAAACTTTCTTTTGATTGAGCAGTTTGGAAACACTCTTTTAGTAGAAACTGCAAGGGGATATTTGGAGAGTTTTGTGGTCTATGGTAGAAAAGGATATATCTTCACATAAAAATAGAAGCATTCTGAGGAACTTCATGATGTGTGCATTCGTCTCAAGGAGTTGAACTTTTCTTTTGATTGAGCAGCTTTGAATAACTCTTTCTGCAGAATCTGCAAGTTGATATTTGGAGTGCTTTGTGGCCTATAGTAGAAAAGGAAATATCTTTACATAAAACTAGACAGAAGCATTCTGAGAAAATTTTTTGTGATGTGTGCATTCAACTCACAGAGTTGAACCTTTCTTTTGATCGAGGAGTTTGGAAGCAGTCTTTTTGTAATATCTACAAATGGATATTTGCATCACTTTACTTCATGGAATGGAAAAGGAAACATCTTAACATAAAAACTAGACAAAAGCATTCTGAGAAACTTCTTTGTGACGTGTGCATTCAACTCATGGAGTTCAACCTTTCTTTTGATTCAGCAGTTTGGAAACAGTCTTTTTACAGTATCTGCAAATGGCTATTTGGAGAGCATTGACGCCTATGGTGGAAAAGGAAATCTCTTCTCATAAAAACTAGACAGCAGCATTCTGAGAAACTTATTTGTGATCTGTGCATTCATCTCACAGAGTTGAACCTTTCTTTTGATTCAGCAGTTTTGAAACTGTCGTTTTGTAGAATCTGCAAAGGAATATTTGTGAGCCCATTGAGGCTTCTGGGGTGATAGGAAATATCTTCACATTAAAACTAGACAGATACTTTCGGAGAAACTATTTTGTCATGTGTGACTTCTACTCACAGGGTTGAAACTTTCTCTTGATTGAGCAGTTTGGAAACAGTCTTTTTGTAGAATCTGCAAATTGATATTTGGAGTGCTTTTGGCCTACGTTGAAAAACGAAATATCTTCCCATAAAAAGTAGGCAGAAGTTTTGGAGAAACTTATTTTGATGTGTGCATTCATCTCACACAGTTGAAATTTTCTTTTGATTGAGCAGTGTGGATACACTCGTTTTGTAGAGTCTGCAAGTGGATATTTGGAGCACTTTGTGGCCTATAGTGAAAAAGGAAATATCTTCACATAAAAACTAGATAGAAGAATTCTGAGAAACTTCCTTTGAATGGGCGCATTCATCTCACACTGTTGAAC

>D13Z6 Acc No. GJ211965.2

TGCATTCTCAGAAAGTTCTTTGTGATGTGTGCATTCAAATCACAGATTTGAACATACCTTGTCATAGAGCAGTTTTGAAACACTCGTTTCGTAGAATCTGCAACTGGGTATTTGGACTTCTTTGAGGCCTTCGTCGGAAACGGGAATATCTTCACATAAGAACTAGACAGAAGAATTCTGGGGAATTTCTTTGTGATGTGTGCATTCAACTCACAGAGTTGAACCTTTCTGTTGATAGAGCAGTTTGGAAACACTCTTTTCGCAAAATCTGCAGAGTGGATATTTGTACTGCTTAGAGGCCTTCGTTGGAAACGGGAATATCTCCACATAAAAACTAGACAGAAGCATTCTCAGAAACTTCTTTGTGATCTGCACATTCAACACAAAGAGTAGAATCTTCCTTTTGATAGAGCAGTTTTTAAACACTCTTTTTGTAGAATCTGCAAGTGGACATTTGGAAAGCTTTGAGGCCTGTGGTGGAAAAGGAAATACCTTCACATAAAAACCAGACGGAAGCATTCTCAGAAACTTCTTTGTATTGTTTGCATTCAACCCACTGAGTTGAACACACCTTTTCACAGAGCAGTTTTGAAACACTCTTTTTGTAGAATCTGCAAGTGGATATATGGAGTGCTTTGAGGCCTTCTTTGTAAACGGGAATATCTTCACATAAAAACTAGAGAGAAGCATTCTCAGAGCCTTCTTTGTGATGTGTGCATTCAACTCACAGAGCTGAACCTTTCTTTTGATAGAGGTGTTTGAAGCACTGTTTTTTTAGAATCTGCAAGTGGATATATTGAGTGCTTTGAGGCCTTCTTTGTAAACGGGAATATCTTCACATAAAAACTAGAGAGAAGCATTCTCAGAGCCTTCTTTGTGATGTGTGCATTCAACTCACAGAGCTGAACCTTTCTTTTCATAGAGCTGTTTGGAAGCACTGTTTTTTTAGAATCCGCATGTGGAAATTTTCAGAGCTTCGAGGCCTGTGGTGGAGAAGGAAATATCTTCACATAAAAACTAGACAGAAGCATTCTCAGAAACTTGTTTGTGACGTTTGCATTCAACTCACAGAGTTGAACATACCTTTTCATAGAGCAGTTTTGAAACACTCTTTTCGTAGGATCTGCAAGTGGATATTTGGACTGCTTTGAGGCCTTCGTTGGAAAGAGGAATATCTTCACATAAAAACTAGACGGAAGCATTCTCAGAAACTTCTTTGTGATGTGTGAATTCAACTCACAGAGTTGAAGCTTCCTATTGATAGAGCAGTTTTGAAAAACCGTTTTTGTAGAATCTGCCAGTGGATATTTGGAGAGCTTTGAGGCCTACGGTGGAAAAGGAAATATCTTCACATAAAAACCAGACACAAAGATTCTCAGAAACTTCTTTGTGACGCTTGCACTCAACTCACAGAGTTGAACACACCTTTTCATAGAGCAGTTTTGAAGCACTCTTTTCGTAGAATCTGCAAGTGTATATTTGGAATGCTTTGAGGCCTTCATTGTAAACGAGAATATCTTCACATAAAAACGAGACAGAAGAATTCTCAGCAACTACTTTGTGATGATTGCATTCAACTCACTGTGTTAATCTTTATTTTGATAGGGCAGTTTTGAAACACTGTTTTTGTAGCATCTGCAAGTGGTCATTTGGAGAGCTTTGAGGCCTATGGTGGAAAAGGAAATATCTTCACATAAAAACAGGACAGAAGCATTTTCAGAATCTCCGCTGTGATGTTTGCATTGAACTC

>D13Z7 Acc No. GJ211967.2

AGCATTCATAGAAACTTCTTTGTGATGTATGCATTCAACTCACAGAGTTGAAACTATCTTATTATTGAGCAGTTTTGAATCTCTCTTTTTGCAGAATCTGCAACTGGATATTTGGAGCGCTTTGAGGCCTACCGTGGAAAAGCAAATATCTTCAGATAAAAGCTACACAGAAGCTTTCTGAGAAACTTTTTTGCGATGTGTGCATTCAACTCACAGAGTTGAAACTTTCTTTTGATTGAGCAGATTTGAAACACTCTTTTTGTAGAAACTGTAAGTTGATATTTGGAGCCCTTTGAGGCCTATTGTGGAAAAGGAAATATCTTCACGTAAAAACTACATAGAACCATTCTGAGATACTTCTTTTTGATGTTTGCATTCATCTCACAGTGTTGAAAGTTTCTTTTGATTGAGCAGTTTTGAAACACTCTTTTTGTAGAATCTGCAAGTGAATAATTGGAGCCCTTTGAGGGCTATGGTAGAAAAGGAAATATCTTCAAATAAGAACTACAAAGAAACATTCTCAGAAACTTATTTGTGATGTGAGCATTCAACTCACAGACCTGAACATATCTTTTGATTTAGCACTTTTGAATTTCTCTTTTTGTAGAATTTGCAAGTGGATATTTGGAGCGCTGTGAGACCTACTGTGGGAAATGAAATATGTTCACATAAAAACTACTCAGAACCATTCTGAGAAACTTCTTTGTGTCGTGTGCATTCGACTCACAGAGTTGAACATATGTCCTCTTTGAGCAGTTTTGCGTCTCTCTTTTTGTAGAATGTACAAGTGGATATTTGGAGCCCATTGTGTCCTATGGTGGAAAAGGAAATATCTTCAGATAAAAATTACACAGAAGAATTCTGAGAAACTTCTTTGTGATATGTGCATTTATCTCACAGGTTTGAACCTACCGTTTTATTGAGCAGTTTTGAAACACTGTTTTTGTAGAATCTGCAAGTGGATATTTAGAGGGAATTGAGGCCTACCGTGGAAAAGCATATACCTACAAACAAAAACTAAACAGAAGCATTCTGAGAAACTTCTTAGTGATGTGTGCATTCGTCTCACAGAGTTGAAACTTTCCTTTGATTGAGCAGTTTTGAAACACTCTTTTTGTAGAATCTGCAACTGGATATTTGGAGCCCTTTGAGGAATATTGTGGAAAAGGAAATATCTTCACATAAAAACTACACAGAAGCATTCTGAGAAACTTCTTTATGAGGAGTCCATTCAACCCACAGAGTTAAACTTTTCTTCTCATTGAGCAGTTTTGAATCTCTCTATTTGTAGAATCTGCAAGTGGATATTTGCTGCCCTTTGAGGCATACTGAGGAAAAGCAAATATCTTCATATAAAAACTACACAGAAGCATTCTGAGAAACTTCTTTGGGATGTGTGCATTCAACTCACAGAGTTGAACCTATCTTTTGATTGAGCAGATTTGAATCTCTCTTTTGGCAGAAACTGCAAGTAGATATTTGGAGCCATTTGCGGCCTTTTGTGGAAAAAGAAATATTTTCAAATAAAAACTAAACAGAAACATACTGAGAAACTTCTTTGTGATGTGTGCATTCATCTCACAGGGTTGAAACTATCTTATGATTGAGCAGTTTTGAAACACTCTTTTTGTAGAATCTGCAACTGGATATTTGGAGCCCTTTGAGGGCTATTGTGGAAAAGTAAATATCTTCACATAAAAACTATTCAGGAGCATTCTGATAAACTTCTTTGTGATGTATGCATTCAACT

>D13Z8 Acc No. GJ211968.2

GGCATTCTGAGAAACTTCTTCGTGATGTGTGCATTCATCTCACAGAGTTGAACCTATCTTATGATTGAGCAGATTTGAAACACTGGCTTTGTAGATGCTGCAAGTGGATATTTGGAGCGCTTTGAGGCCTACTGTGGAAAAGGAAATATTTTCACATAAAAACCACACAGAAGCCTTCTGAGAAACTTCTTTGTGATGTGTCCATTCAACTCACTGCCTTGAACCTATCTTTTGATTGAGCAGTTTCGGATCTCTCTTTTTCAGGAACCTGCAAGTGGATGTTTGGAGCCCTTTGCGGTCCATGGAGGCAAAGGAAATATCTTCAAATAAAAACTACACAGAAGCGTTCTGAGAAACTTCTTTGTGATGTGTGCATTCATCTCACAGAGAAGAACCTATCTTATGACTGAGCAGCTTTGAAACACTCTCTTTGCAGAATCTTCAGGTGTATATTTGGAGTGCTTTTTGGCCTATTTTGTAAAAGGAAATATCTTCACATAAAACCTACACAGATTTATTCTGAGAAACTACTTTTTGTTGTGTGTATTCATCTAACAGAGTTGTACGTTTCTTTTGATTGAGCAGTTTTGAAACACAGTTTTTACAGAATGTGCAAGTGGATATTTGGAGCGCTTTGGGGCCTACTGTGGAAAAGCAAATATCTTCACGTAAAAACCACACAGAAGCATTCTAAGAAACTTCTTTGTGATGTGTGCATTCATCCCACAGAGATGAAAGTTTCTTTTGATTGAGAACTTTTGAAACACTCTTTTTGTAGAATCTGCAAGTGGATATTTGGAGCGCTTTTAGACCTACTGTGGAAAAGGAAATATCTTCCCATAAAAACTACACAGAAGCATTCTGAGAAACTTCTTTGCAATGTGTGCATTCAACTCATAGAGTTGAACCTATCTTTTGATTGAGCAGTTTTGAATTTCTCTGTTTGCAGAATCTGCAAGTGGATATTTGAAACCCTTTGCAGCCAATGGAGGATAAGGAAATATCTTCAAATAAATACTACACAGAAGCATTCTGAGAAACTTCTTTGTGATGTGTGCATTCATCTCATAGATTTGAACATATCTTATGATTGAGTACATTTGAAACACTCTCTTTGTAGAATCTGCAAGTGGATACTTGGAGGGCTTTCAGGACTGTTGTGGAAAAGGAAATATCTTCACGTAAAAACTTCACAAAAGCATTCTGAGATACTTCTTTATGATGTATGCACTCAACTCAGAGAGTTGAACCTATCTTTTGATTGAGAAGTTTTGAAACACTCTGTTTGTAGAATCTGCAAGTGGATATTTGGAGTGCTTTGAGGCCTATTGTGGAAAAGGTAATATCTTCACATAAAAACTACAAATAAGCATTCTGAGAAACTTCTTTGTGATGTGTGAATTCAAGTCACAGAGTTTAACCTATCTTTTGATTGAGCAGTTTTGAATCTCTCTTTTTGTAGAATCTGCAAGTGGATATTTGGTGGGCTTTGAGGCCTATTTTGGAAAAGGAAACATCTTCACATAAAAACTACACAGAAGCCTTCTGAGAAACTTCTTTGTGATGTGTCCATTCAACTCACAGCCTTGAACCTATCTTTTGATTGAGCAGTTTCGGATCTCTCTTTTTCAGGAACCTGCAAGTGGATGTTTGGAGCCCTTTGCGGTCCATGGAGGCAAAGGAAATATCTTCAAATAAAAACTACACAGAAGCATTCTAAGAAACTTCTTTGTGATGTGTGCATTCATCC

>D13Z9 Acc No. GJ211969.2

GGAATTCTGAGAGACTTCTTTGTGATGCGTGTACTCATCTTACAGAGTTAAACCTTCCTTTTGAATGAGCAGATTTGAAACTGTCTTTTTGTAGAATCTGCAAGTGGACATTTTGAGCGCCTTGAGGCCTATGGTGGAAAAGAAAATGCCTTCACATGAAAACTAGACAGAAGAATTCTGAGAAACTTCTTTCTTATGTGTGCGTTAATCTCACACAGTTGAACCTTTCTTTTGATTGAGCAGTTTCAAACACTCTTTTTGTAGAATCTGCAAGTGGACTTTTGGAGCACTTTGTGGCCTACGGTAGAAAAGGAAATATCGTCACATAAAATCTAGACAGAAGCAATCTGAGACTTCTTTGTGATGTGTGCATTCACCACACATTGTGTAACCTTTCCCTTGATTGAGCAGTTTTGAAACTCTTTTTGTAGAATCTACAAGTCTACATTTGGAGTGCTTTGAGGCCTATGGTAGAAAAGGAAATATCTTCACATAAAAACTAGTCAAAAGAATTCTGAGAAACTGCTTGGTGATGTGTGCGTTCACCACACAGAGCTGAACCATTGTTTTGATTGAGCAGTTTGGAAACCCTCTTTTTGTAGAATATGCAAGTGGACATTTGGAGTACTTTGATGCCCCTGGTCGAAAAGGAAATATCTTAACTTAAAAACTAGACAGAATAATTCTGGGAAACTTCTTTCTGATGTGTGCGTTCATCTCACAGAGTTAAACTTTTCATTTTATTGAGCAGTTTGGAAACACTCTTTTTGTAGAATCTGCAAGTGGACATTTGGAGCGCATTGTGGTATGCAGTAGAAAAGGAAATGTCTCCACAAAAAATGTAGACAGAAGCAGTCTTATAAACTTCTTTGTGATGTGTGCATTCATTTCACAGATTTGAACCTATCTTTAGATTGAGCAGTTTGGAAACACTCTTTTTGTAGAATCTGCAAGTGCACACGTGGAGAGATTTGCGGCCAATGGTAGAGAAGCAAATATCTTCGCATAAACTCTAGACAGAAGCATTCTGACAAACTTCTTTGTGATGTGTGCATTCATCTCACAAAGAATTGAAACTTTCTTTGATTCAGGAGCTTTGAAACACTCTTTTTGTAGAATCTGCAAGTGTACATTTGGAGCGCTTTGAGGCCTATGGTGGAAAAGGGAACATCTTCACATATAGAACAGACAGAAGCCTTCTGACAAACTTCTTTTCAATGTGTGCGTTCAACTCAAAGATTTGAACCTTACTTTTCATTGAGCAGATTTGAAACACTCTTTTTGTAGAATCTGCAAGTGGACAATTGGACCGCTTTCTGGCCTATGGTGGAAAAGGATGTATCGTCACATAAAAACTAGACAGAAATCTTCTGACAAACTTCTTTGTTATGCATGCATTCATCTTTCAGAGTTGAACCTTCCTTTTGATTGAGCAACTTTGAAACACTCTTTTTGTAGAATCTGCAAGTAGTCATTTGTAGCGCTTTGGAGACTATGGCGAAAAAGGAAATATCTTCCCATAAAAACTAGACAGAGGCATTCTGACAAACTTCTTTGTGATGTGGGCATTCATCTCACAGAGTTGAACCTTACTTTTCATTGAGCTATTTTGAAACACTCTTTTTGGAGAATCTGTAAGTGGACTTTTTGAGGGCTTTGACGCACGTGGTGGAAAAGGAAATATCTTCATATAAAAACTAGACAGAAGGATTCTGAGAAACTTCTTTGTGATGTGTGCATTCATCTCACA

>D14Z1/D22Z1 Acc No. M22273.1

CAATCTCAGAATCTTCTTTGGGATATATGCACGCAGCTAACAGAGTTGAACTTTTCTATTGACAGAGCAGTTTTGAAACAGTCTTTCTGTGGAATCTGCAAGTGGATATTTGGATAGCTTGGAGGATTTCGTTGGAAACGGGATTACGTATAAAAAGCAGACAGCAG

>D14Z2 Acc No. GJ211972.2

AGCATTCTGTGAAACTTGTTTGTGATGTGTGTACTCAACTAACAGTGTTGAACCTTTCTTTTTACAGAGCAGTTTTGAAACACTCTTTTTGTAGAATCTGCGAGGGGATATTTGGATACATTTCAGGATTTCGTTGGAAACGGGAATATCTTCATATAAAATCTCGACAGAAGCATTCTCAGAAACTTCTTTGTGATATGTGCATTCAAGTCACAGAGTTGAATATTCCCTTTCACAGAGTAGGTTTGAAACACTCTTTTTGTAGTATCTGAAAGTGGACATTTGGAGCGCCTTGACACCTACGGTGAAAAGGGAAATATCTTCCCATAAAAACTAGACAGAAGCAATCTCAGAATCTTCTTTGGGATATATGCACGCAGCTAACAGAGTTGAACCTTTCTATTGACAGAGCAGTTTTGAAACAGTCTTTCTGTGGAATCTACAAGTGGATATTTGGATAGCTTGGAGGATTTCGTTGGAAACGGGATTACGTATAAAAAGTAGACAGCAAGCATTCTCATAAACTTGTTTGTGATGTGTGAACTCAGCTAACAGGCGTGGATCTTTCTTTTGATACAGCAGTTTTGAAAAACACTTTTTGTTGAATCTGCAAGTGGACATTTGGATAGATTTGAAGATTTCGTTGGAAACGGGAATATCTTCATATCAAATCTAGACAGAAGCATTCTCAGAAACGTCTTTGTGATGTTTGCATTCAACTCATAGAGTTGAACATTCCGTTTCAGAGAGCAGGTTTGAAGCACTCTTTTTGTAGTATGTGCAAGTGGATATTTGGAGCGCTCTGAGGCCTACGGTGAAAAAGCAG

>D14Z3 Acc No. GJ211986.2

AATATTCTGGGAAAGTTCTTTGTGGTGCGTGCATTCATGTCATAGAGTTGAAACTTTCTTTTGATGGAGCAGTTTTGAAACACTCTTTTTGTACAATCTGCTAGTGGATAATTGGAGCCCTTTGAGGACTATTGTGGAAAAGGAAATATCTTCACGTAAAAACTACATAGAACCATTCTGAGATACTTCTTTTTGATGTTTGCATTCATCTCACAGTGTTGAAACTTTCTTTTGATTGAGCAGTTTTGAAACACTCTTTTTGTAGAATCTGCAAGTGAATAATTGGAGCCCTTTGAGGGCTATGGTAGAAAAGGAAATATCTTCAAATAAGAACTACAAAGAAACATTCTCAGAAACTTATTTGTGATGTGTGCATTCAACTCACAGGGCTGAACATATCTTTTGATTTAGCAGTTTTGAATTTCTCTTTTTGCAGAATCTGCAAGGGGATGTTTGGAGAGCTTTCAGGCATATTGTGGAAAGGGAAATATTTTCACATAAAAACTACACAGAACCATTCTGAGAAACTTCTTTGTGTCGTGTGCATTCAACTCACAGAGTTGAACATATGTCCTCTTTGAGCAGTTTTGCGTCTCTCTTTTTGTAGAATGTACAAGTGGATATTTGGAGCCCATTGTGTCCTATGGTGGAAAAGGAAATATCTTCAGATAAAAATTACACAGAAGCATTCTGATAAACTTCTTTGTGATGTATGCATTCAACTCACAGACTTGAACCTATCTTAAGAATGAGCAGTTTTGAATCTCTCTTTTTGCAGAATCTGCAACTGGATATTTTGAGGGCCTTAAGGCCTACCGTGGAAAAGCAATTATCTTCAGATTAAAACTACACAGAAGCATTCAGAGAAACATCTTTGTGATGTTTGCATTCATCTCACAGAGTTAAAACTTTCTCTTGATGGAGCAGTTTTGAAACACTCTTTTTGTAGAATCTGCAAGTGGATATTTGGAGCCCTTTGAGGCCTGTTGTGGAAAAGGAAATATCTTCCCATGAAAACTACATAGAAGTATTCTGAGAAACTTCTTTGCAATGTGTGCATTCAACTCACAAGAGTTGAACCTATCTTTTGATTGAGGATTTTTGAATCTTTCTTTTTGCAGAATCTGCAAGTGTATGTTTGCAAAGCTTTGTGGCCTATTGTGGAAAAGGAAATGTCTTCACATAAAAACTACACATA

>D15Z3 Acc No. AF237720.1

ATTCTCAGAAACTTATTTGTGATGTGTGTCTTCAACTAACAGAGTTGAACCTTTGTTTTGATACAGCAGTTTGGAAACACTCTTTTTGTAGAATCTACAAGTGGATATTTTGAGAGCATTGAAAATTTCGTTGGAAACGGGAATACCTTCATATAAAATCTAGACAGAAGCATTCTCAGAAACTTCTTTGTAATGTTTGCATTCAACTCATAGAGTTGAACATTCCCTTTCATACAGCAGGTTTGAAACACTCTTTTTGTAGTATGTGGAAATGGACATTTCGAGCACTCTTAGGCCTAAGTTGAAAAGGGAAATATCTTCAAATAAGAACTAGTCAGCAGCATTCTCAGAAAGCTCTTTGTGATGTGTGTACTCAGCTAACAGAGTTGAACCTTCCATTTCACAGAGCAGTTTGGAAACACTCTTTTTGTGGCATTTGCAAGTGGACATTTGGATAGCTTTGAGGATTTCTTTGAAACGGGAATAATTTCATATAAAATCCTAGACAGAAGCATTCTCAGAATCTTCCTTGTGATGTATGCCCTCAATTCACAGAGTTGAACCATTGTTTGGGATACAGCATTTTGGGAAACATTCCTTTTGTAGAATCTGCAAGTTGATATTTGTATAACTTTGAGGATTTCGTTGGAAACGGGAATATCTACATATAAAATCTAGACAGAAGCATTCTCAGAAACCTGTTTTAATGTTTTCATTCAACTCATACGTTTCAACAATCCCTAACCTAAATTAAGGTTTGAAACACTCCTTTTGTANTATGTGGAAATGGACATTTGGANCGCTTTGANGCCTACGGTGAAAAAGGAAATATCCTTCCCATAAAAACTNNGACAGGAAGCATTCTCANACANTTGAAAATTTTCGATTANTTCTTGAGGATTTTCGTTTGGAAACGGGANTTACCAANTTGGAAAGTTGACCAGCCNGCCTTTTCTCAGAAAATTGCTTTGTGATGTCTGCCATTCANGTCACATTGGTTGAACATTCCCTTTCTTGGAGCCAGNTTTGAATCACTTGTCTCTNGTAGTATCTTGGAAGTGGATATTTTCGAGCGCTTTTGAGGCCTTAAGNTGAGAAAGGAAATGTCCTTCAATTAGGAACTGGACAGANGCATTCTCAGAAACTTATTTGTGATGTGTGTCCTCAACTAACAGAGTTGAATCTTTGTTTTGATACAGCAGTTTGGAAACACTCTTTTTGTAGAATCTACAAGTGGATATTTTGAGAGCATTGAAAATTTCGTTGGAAGCGGGAAAACCTTCATATAANTTCTAGACAGAAGCATTNTAAGAAACTACTTTGCAATGTTTGCATTCAACTCATAGAGTTGCACATTCCGGTTCATACAGCAGGTTTGAAACACTCTTTTTGTAGTATGTGGAAATGGACAATTGGAGCCCTTTGAGGCCTACGGTGAAAAAGGAAATATCTTCCCATAAAAACTAGACAGAAGCATTCTCAGAAACTTGTTTGTGACGTGTGTATTCAACTAACAGAGTTGAACCTTTCTTTTTACAGGGCAGCTTTGAAACACTCTTTTTGTGGAATCTGCAATTGAAAATTTCCGTAGTTCTGAGGATTTCGTTGGAAACGGGATTACAAATAGAAAGTAGACAGCAGCATTCTGAGAAACTGCTTTGTGATGTTTGCATTCAAGTCACCTAGTTGAACATTCCCTTTCATAGAGCAGGTTTGAATCACTATTTCTGTACTATCTGGAAGTGGATATTTCGAGCGCTTTCAGGCGTAAGGTGAGAAAGGACACGTGCTTCNATGNCAGAACTAAACAGAGATTA

>D16Z2 Acc No. M58446.1

GAATTCTCAGTAACTTCCTTGTGTTGTGTGTATTCAACTCACAGAGTTGAACGATCCTTTACACAGAGCAGATTTGAAACACTGTTTTTCTGGAATTTGCAAGTGGAGATTTCAGCCGCTTTGAGGTCAATGGTAGAAAAGGAAATATCTTCGTATAAAAACTAGACAGAATGATTCTCAGAAACTCCTTTGTGATGTGTGCGTTCAACTCACAGGGTTTAACCTTTCTTTTCACAGAGCAGTTAGGAAACACTCTGTTTGTGAAGCCTGCCAGTGGATATTCGGACCTCTTTGAGGCCTTCGTTGGAAACGGGATTTCTTCATATTATGCTAGACAGAAGATTTCTCAGTAACTTCTTTGTGTTGTGTGTATGCAACTCACAGAGTTCAACCTTCCTTTAGACAGAGCAGATTTGAAACACTCTTTTTGTGGAATTTGCAAGTGGAGATTTCAAGCGCTTCGATGCCAATGGTAGAAAAGGAAATATCTTCGTATAAAAACAAGACAAACTCGTTCCCAGACACTGCGTAGTGATGTGTGCTTTTAACTCACAGAGTTTCACCTTTCTTTTCATACAGCATTCTGGAAACCCTCTGTTTGTAAAGTCTGCAAGTGGATATTTGGACCTCTTAGATGCCTTCGTTGCAAACGGGATTTCTTCATATAATGCTAGAGGGAG

>D17Z1 Acc No. M13882.1

AATTCGTTGGAAACGGGATAATTTCAGCTGACTAAACAGAAGCAGTCTCAGAATCTTCTTTGTGATGTTTGCATTCAAATCCCCGAGTTGAACTTTCCTTTCAAAGTTCACGTTTGAAACACTCTTTTTGCAGGATCTACAAGTGGATATTTGGACCACTCTGTGTCCTTCGTTCGAAACGGGTATATCTTCACATGCCATCTAGACAGAAGCATCCTCAGAAGCTTCTCTGTGATGACTGCATTCAACTCACGGAGTTGAACTCTCCTTTTGAGAGCGCAGTTTTGAAACTCTCTTTCTGTGGCATCTGCAAGGGGACATGTAGACCTCTTTGAAGATTTCGTTGGAAACGGAATCATCTTCACATAAAAACTACACAGATGCATTCTCAGGAACTTTTTGGTGATGTTTGTATTCAACTCCCAGAGTTGAACTTTCCTTTGGAAAGAGCAGCTATGAAACACTCTTTTTCTAGAATCTGCAAGTGGACGTTTGGAGGGCTTTGTGGTTTGTGGTGGAAAAGGAAATATCTTCACCTAAATACTAGATAGAAGCATTCTCAGAAACTGCTTTGTGATGATTGCATTCACCTCACAGAGTTGAACATTCCTATTGATAGAGCAGTTTGGAAACACTCTTGTTGTGGAATGTGCAAGTGGAGATTTGGAGCGCTTTGAGGCCTATGGTAGTAAAGGGAATAGCTTCATAGAAAAACTAGACAGAAGCATTCTCAGAAAATACTTTGTGATGATTGAGTTTAACTCACAGAGCTGAACATTCCTTTGGATGGAGCAGGTTTGAGACACTCTTTTTGTACAATCTACAAGTGGATATTTGGACCTCTCTGAGGATTTCGTTGGAAACGGGATAACTGCACCTAACTAAACGGAAGCATTCTCAGAAACTTCTTGGTGATGTTTGCATTCAAATCCCAGAGTTGAACCTTCCTTTGATAGTTCAGGTTTGAAACACTCTTTTTGTAGGATCTGCAAGTGGATATTTGGACCACTCTGTGGCCTTCGTTCGAAACGGGTATATCTTCGCATAAAATCTAGACAGAAGCCTTCTCAGAAACTTCTCTGTGATGATTGCATTCAACTCACAGAGTTGAACCCTCCTATGGATAGAGCAGTGTTGAAACTCTCTTTTTGTGGAATCTGCAAGTGGATATGTGGACCTCTCCGAAGATGTCTTTGGAAACGGGAATATCTTCACATAAAAACTAAACAGAAGCATTCTCAGAAACTTCTCTGTGATGTTTGTGTTCAACTCCCAGAGTTTCACATTGCTTTTCATAGAGTAGTTCTGAAACATGCTTTTCGTAGTGTCTACAAGTGGACATTTGGAGCGCTTTCAGGCCTGTGGTGGAAAACGAATTATGGTCACATAAAAACTGGAGAGAAGCATTGTCAGAAACTTCTTTGTGATGATTGCATTCAACTCACAGAGTTGAAGGTTCCTTTTCAAAGAGCAGTTTCCAATCACTCTTTGTGTGGAATCTGCAAGTGGATATTTGGACCTTTTTGAAGATTTCGTTGGAAACGGGAGAATCTTCACAGGAAAGCTAAACAGAAGCATTCTCAGAAACTTCTTTGTGATGCTTGCATTCAACTCACAGAGTTGAACTTTCCTTTCGAGAGAGAAGCTTTGAAACACTCTTTTTCCAGAATCTGCAAGTGGACATTTGGAGGGCTTTGAGGCCTGTGGTGGAAAAGGAATTATCTTCCCGTAAAAGCTAGATAGAAGCATTCTCAGAAACTACTTTGTGATGATTGCATTCAAGTCACAGAGTTGAACATTCCCTTTGACAGAGCAGTTTGGAAACTCTCTTTGTGTAGAATCTGCAAGTGGAGATATGGACCGCTTTAGGCCTATGGTAGTAAAGGAAATAGCTTCATATAAAAGCTAGACAGTAGCATTCACAGAAAACTCTTGGTGACGACTGAGTTTAACTCACAGAGCTGAACATTCCTTTGGATGGAGCAGTTTCGAAACACACTATTTGTAGAATGTGCAAGTGGATATTTAGGCCTCTCTGAGGATTTCGTTGGAAACGGGATAAACCGCACAGAACTAAACAGAAGCATTCTCAGAACCTTCTTCGTGATGTTTGCATTCAACTCACAGTGTTGAACCTTTCTTTGATAGTTCAGGTTTGAAACGGTCTTTCTGTAGAAACTGCAAGTAGATATTTGGACCGCTCTGAGGATTTCGTTGGAAACGGGATAACCCGCACAGAACTAAACAGAAGCATTCTCAGAACCCTCTTCGTGATGTTTGCATTCAACTCACAGTGCTGAACCTTTCTTTGATAGTTCAGCTTTGAAACACTCTTTTTGTAGAAACTGCAAGTGGATATTTGGTCCTCTCTGAGCATTTCGTTGGAAACGGGATAAACTGCACAGAACTAAACAGAAGCACTCTCAGAACCTTCTTCGTGATGTCTGCATTCAACTCACAGTGTGGAACCTTTCTTTGATAGTTCAGGTTTGAAACACTCTTTTTGTAGAAACTGCAAGGGGATCATTGCACTCTTTGAGGAGTACCGTAGTAAAGGAAATAACTTCCTATAAAAAGAAGACAGAAGCTTTCTCAGAAAATTCTTTGGGATGATTGAGTTGAACTCACAGAGCTGAGCATTCCTTGCGATGTAGCAGTTTAGAAACACACTTTCTGCAGAATCTGCAATTGCATATTTGGACCTCTTTGAGG

>D17Z1b Acc No. GJ212053.1

ATACTAGATAGAAGCCTTCTCAGAAACTACTTTGTGATGATTGCATTCACCTCACAGAGTGGAGCATTCCTATTGACAGAGCAGTTTGGAAACACTCTTGTTGTAGAATCTGCTAGTGGAGATTTGGAGCGCTTTGAGGCCTATGGTAGTAAAGGGAAGAGCTTCACATAAAATCAAGACAGAAGCATTCTCAGAAAATACTTTGTGATGATTGAGTTTAACACACAGAGCTGAACATTCCTTTGGATGGAGCAGGTTTGAAACACACTTTCTATAGAATCTGCGAGTGGATATTTGGACCTCTCTGAGGATTTCGTTGGAAACGGGATAACTGCACCTAACTAAACGGTAGCATTCTCACAAAATTCTTCGTGATGTTTGCATTCAAATCCCAGAGTTGAACCTTCCTTTGATAGTTCAGGTTTGAAACACTCTTTTTGTAGGATCTGCAAGTGGATATTTGGACCACTCTTTGGCCTTCCTTCGAAACGGGTACATCTTCAAATAAAATCTAGACAGAAGCCTTCTCAGAAACTTCTCTGGGATGATTGCATTCAACTTTGAGTTGAACCCTGCTATGGATAGAGCAGTTTAGAATCTCTCTTTTTGTGGAATCTGCAAGTGGATATGTCGTCCTCCTTGAAGATGTCTTTGGAAACGGGAATATCTTCACATAAAAACTAAACAGAAGCATTCTCAGAAACTTCTCTGTGATGTTTGTGTTCAAATCACAGAGTTTCACGTTGCTTTTCATAGAGCAGATGAGAAACATGCTTTTCGTAGGGTCTGCAAGTGGACATTTGGAGAGATTTCAAGCCTGTGGTGGAAAACGAATTATCGTCACGTAAAAACTAGAGGGAAGCATTGTCAGAAACTTGTTTGTGATGACTGCATTCAACTCACAGAGTTGAAGGTTCCTTTTCAAACAGCAGTTTCCAAACACTCTTTCTGTGGCATCTGCAAGTGGATGTTTGGGCCTCTTTGAAGATTTCGTTGGAAAAGGGATAATCTTCACAGAAAAGCTAAACAGAAGCATTCTCAGAAACCTCTTTTTGATGTTTGCTTTAAACTCACAGAGTTGAACTTTCCTTTTGAGAGAGAAGCTTTGAAACACTCTTTTTCTAGAATCTGCAAGTGGATATTTGGAGGGCTTTGAGGACTGTGGTGGAAAAGGAATTATCTTCCCGTTAGAACTAGATAGATGCATTCTCAGAAACTACTTTGTGACGATTGCATTCAAGTCACAGAGGTGAACATTCCCTTTCACAGAGCACTTTGGAAACTCTCGTTGTGTAGAATCTGCAAGTGGAGATATGGACCGCTTTGAGGCCTACGGCAGTAAAGGAAACAGCTTCATATAAAAACTAGACAGCAGCATTCTCAGAAAACTCTTTCTGACGACTGAGTGTAACTCACAGGGTTGAACATTCCTTTTGATGGAGCAGTTTGGAAACACACTATCTGTAAGATCTGCAAGCGGATACTTGGGCCTCTCTGAGGATTTCGTTGGAAACGGGATAAACCGCACAGAACTAAACAGAAGCATTCTCAGAACCTTCTTCGTGACGTTTGCATTCAACCCACAGTGTTGAACCTTTCTTTGATAGTTCAGGTTTGAAACACTCTTTTTGTAGAAAGTGCAAGAGTATAACTGCACTTCTTTGAGGCCTATCGTAGTAAAGGAAATAACTTCCTATAAAAACAAGACAGAAGCTTTCTCAGAAAATTCTCTCAGATGATTCAGTTGAACTCACAGAGCAGTACTTTCCTTGGGATGGAGTAGTTTCGAAACACACTTT

>D18Z1 Acc No. M65181.1

CTGCAGCGTTCTGAGAAACATCTTTGTGATGTTTGTATTCAGGACACAGAGTTGAACATTCCCTATCATAGAGCAGGTTGGATCACTCCTTTTGTAGTATCTGGAAGTGGACATTTGGAGCGCTTTCAGGCCTATTTTGGAAAGGGAAATATCTTCCCGTAACAACTATGCAGAAGCATTCTCAGAAACTTGTTTGTGATGTGTGCCCTCTACTGACAGAGTTGAACCTTTCTTTTCATAGAGCACTTTTGAAACACTCTTTTTGTAGAATCTGCAAGAGGATATTTGCATAGCTTTGAGGATTTCGTGGGAAACGGGATTGTCTTCAGGCAAAGTCTAGACAGAAGCATTCTCAGAAACTTCTTTGGGATGTTTGCATTCAAGTCACAGAGTAGAACATTCCCTTTGGTAGAGCAGGTTTGAAACACTCTTTTTGTAGTATCTGGAAGTGGACATTTGGAGCGCTTTCAGGCCCATGTTGGAAAGGGAAATATCTTCCCGTAACAACTAGGCAGAAGCATTCTCAGAAACTTATTTGAGATGTGTGTACTCAACTAAGAGAATTGAACCTCCGTTTTGAAGGAGCAGTTTTGAAACACTCTTTTTCTGCAATCTGCAAGAGTATATTTGCCTAGCCTTGAGGATTTCGTTGGAAACGGGATTGTCTTCAGAGAAAATCTAGAGAGAAGCATTCTCAGAAACTTCTTTGGGATGCTTGCATTCAAGTCACAGAGTAGAACATTCCCTTTGGTAGAGCAGGTTTGAAACACTCTTTTGTAGTATCTGGAAGTGGACATTTGGAGCGCTTTCAGGCCTACGTTGGAAAAGGAAATATCTTCCCATAACAACTAGACAGAAGCATTCTCAGAAACTAGTTTCTGATGTGTGTCCTCAACTAACAGAGTTGAACATTTCTTTAGACAGAACAGTTTTGAAACACTCTTTTTGTGGAATCTGCAAGTGGCTATTTGGCTAGATTTGAGGATTTCGTTGGAAACGGGATTACATATAAAAAGCAGTCAGCAGCATTCTCAGAAAGTTCTTTGTGATGATTGCATTCAAGTCACAGAATTGAACATTCCCTTTCACAGAGCAGGTTTGAAACACTCTTTTTGTAGTGTGTGTAAGTGGACATTTGGAGCACTTACCGGCCTAAGGTGAAAAAGGAAATATCTTCCCATAAAAACTGGACAGAAGCATTCTCAGAAACTTACTCGTGATGTGTGTCCTCAACTAAAGGAGTAGAACCTTTCTTTTCATAGAGAAGTTTTGAAACGCTCTTTTTGTGAAATCTGCAAGTGAATATTTGGCTGGTTTTGAGGATTTCGTTGGAAGCGGGAATTCATACAAATTGCAGACTGCAG

>D18Z2 Acc No. M65182.1

CTGCAGATGGATATTCGGATAGCTCTGAGGATTTCGTTGGAGACGGGAATACATAAAGAAAGTAGACAGCAGCATTCTCGGGAGATTCTTTGTGATGTTTGCTTTGAAGTCACAGAGTTGAATATTCCCTTCAATAGAGCAGGTTTGAAACACTCTTTCTGTAGTATCTGGAAGTGGACATTTCGATCGATTTCAGGCCTATGTTGAAAAAGGAAATATCTTAACATAAAAACTAGACAGAAGCATTCTCAGAAACGTCTTTGTGATGTGTGTCCTCAACTAACAGAGTTCAACCTTTCTTATGATACAGCAGTTTGGAAACACTCTTTTTATAGAATTTGCAAGTTGATACATGGATAGCCCTAACTATTTCGTTGGAAACGGGAATATCTTCACATAAAACCTAGACAGAAGCACTCTCAGAAACTACTTTGTGATATCTGCATTGATATCAGAGAGTTGAATATTCCCTTTCTAAGGGCAGGCTTGAAAGCGTATTTTCGTGGAATCTGCAG

>D19Z4 Acc No. AC004164

TTGTTTCTAGTTTTTATCATGGGATATTCCGTTTTTTACTAAAGACCTCAATGGGCTCAGGACTGTCCCTAAGTAGATTTTACAGGAAGAGTGTTTTGAACCTGTTGAAACAAAACAAAGGTTAACGTCTGTGAGATGAATCCACACATCACAAAGCATTTTCACAGAA

>D19Z5 Acc No. AC006504

ATTTTTTCTAGGTTTATTGCAGGATATTTAGTTTTTCACTATTGGCCTCAATGGGTTCAGAAATGACCCTTCGTAGCTTCTATAACAAGAGTGTTTCCAGCCTGTTGAATCAAAATAAAGTTTGAAATCTGTGAGATGGATCCATGCATCACA

>D20Z2 Acc No. X58269.1

ACTAACAGAACTAAACCATCGTTTTGAAGGAGCAGTTTTGAAACACTCTTTTTGCGGAATCTGCAAGTGGATATTTGGCTAGCTGGGAGGATTTCGTTGGAAACGGGATTACATACAAAAAGCAGACAGCAGCATTCTCAGAAACTTCTTTGTGATGTTTGCATTCAAGTCACAGAGTTGAACATTCCCTTTCATAGAGCAGGTTTGAAACACTCTTTTTGTAGTATCTGGATGTGGACATTTGGATCGCTTTCAGGCCTATGGTGAAAAAGGAAATATCTTCCCATGAAAGCTAGATAGAAGCTATCTCAGAAACTTATTTGTGATGTGTGCCTCAACTGACAGTGTTGAACCTATATTTTGATAGAGCAGTTCTGAAACACACTTTTTGTAAAATCTGCAAGAGGATATTTGGATAGCTTTGAGGATTTGCTTGGAAACGGGAATGTCTTCATATGAACTCTGGACAGAAGCATTCTCAGAAACTGCTTTGGGATGTTTCAATTGAAGTCCCAGTGTTGAACATTCCCTTTCATAGAGCAGGTTTGAAACACTCTTTTTGT

>D13Z1/D21Z1 Acc No. D29750.1

AATTCAAATAAAAGGTAGACAGCAGCATTCTCAGAAATTTCTTTCTGATGTCTGCATTCAACTCATAGAGTTGAAGATTGCCTTTCATAGAGCAGGTTTGAAACACTCTTTCTGGAGTATCTGGATGTGGACATTTGGAGCGCTTTGATGCCTACGGTGGAAAAGTAAATATCTTCCATAAAAACGAGACAGAAGGATTCTCAGAAACAAGTTTGTGATGTGTGTACTCAGCTAACAGAGTGGAACCTTTCTTTTTACAGAGCAGCTTTGAAACTCTATTTTTGTGGATTCTGCAAATTGATATTTAGATTGCTTTAACGATATCGTTGGAAAAGGGAATATCGTCATACAAAATCTAGACAGAAGCATTCTCACAAACTTCTTTGTGATGTGTGTCCTCAACTAACAGAGTTGAACCTTTCTTTTGATGCAGCAGTTTGGAAACACTCTTTTTGTAGAAACTGTAAGTGGATATTTGGATAGCTCTAACGATTTCGTTGGAAACGGGAATATCATCATCTAAAATCTAGACAGAAGCACTATTAGAAACTACTTGGTGATATCTGCATTCAAGTCACAGAGTTGAACATTCCCTTACTTTGAGCACGTTTGAAACACTCTTTTGGAAGAATCTGGAAGTGGACATTTGGAGCGCTTTGACTGCCTTTGTTGAAAAGGAAACGTCTTCCAATAAAAGCCAGACAGAAGCATTCTCAGAAACTTGTTCGTGATGTGTGTACTCAACTAAAAGAGTTGAACCTTTCTATTGATAGAGCAGTTTTGAAACACTCTTTTTGTGGATTCTGCAAGTGGATATTTGGATTGCTTTGAGGATTTCGTTGGAAGCGGGAATTCGTATAAAAACTAGACAGCAGCATTCCCAGAAATTTCTTTCGGATATTTCCATTCAACTCATAGAGATGAACATGGCCTTTCATAGAGCAGGTTTGAAACACTCTTTTTGTAGTTTGTGGAAGTGGACATTTCGATCGCCTTGACGCCTACGGTGAAAAAGGAAATATCTTCCCATAAAAATAGACAGAAGCATTCTCAGAAACTTGTTGGTGATATGTGTCTCAACTAACAGAGTTGAACTTTGCCATTGATAGAGAGCAGTTTTGAAACACTCTTTTTGTGGAATCTGCAAGTGGATATTTGGATAGCTTGGAGGATTTCGTTGGAAGCGGGAATTCAAATAAAAGGTAGACAGCAGCATTCTCAGAAATTTCTTTCTGATGACTGCATTCAACTCATAGAGTTGAACATTCCCTTTCATAGAGCAGGTTTGAAACACTCTTTCTGGAGTATCTGGATGTGGACATTTGGAGCGCTTTGATGCCTATGGTGAAAAAGTAAATATCTTCCCATAAAAACGAGACAGAAGGATTCTGAGAAACAAGTTTGTGATGTGTGTACTCAGCTAACAGAGTGGAACCTCTCTTTTGATGCAGCAGTTTGGAAACACTCTTTTTGTAGAAACTGTAAGTGGATATTTGGATAGCTCTAATGATTTCGTTGGAAACGGGAATATCATCATCTAAAATCTAGACAGAAGCCCTCTCAGAAACTACTTTGTGATATCTGCATTCAAGTCACAGAGTTGAACATTCGCTTTCTTAGAGCACGTTGGAAACACTCTTTTTGTAGTGTCTGGAAGTGGACATTTGGAGCGCTTTGATGCCTTTGGTGAAAAAGGGAATGTCTTCCCATAAAAACTAGACAGAAGCATTCTCAGAAACTTGTTTTTGATGTGTGTACCCAGCCAAAGGAGTTGAACATTTCTATTGATAGAGCAGTTTTGAAACACTCTTTTTGTGGAAAATGCAGGTGGATATTTGGATAGCTTGGAGGATTTCGTTGGAAGCGGGA

>D22Z4 Acc No. GJ212162.2

AGCATTCCAAGAAATTTTTTGTGATGTGTCCATTTACGTCACAGAGTTGAACCTCTCCTTTGATTGGGCAGTTTGGAAACAGTCTTTTTGTAGAACCTGCAGAGGGATATTTGTGAGCCCTTTATGGCCTGTAGTGAAATACGAAGTATCTTCACCTAAAAACTAGACAGAAGGTTTCTGAGAAACTTCTTGGTGATGTGTGCCTTCATCTCACAGTGTTGAACCTTTCTTTTGATTGAGCAGTTTGCAAAGTCTTTCTGTAGAATCTGTAAATGGATATTTGGAGATATTTGAGGCCCGTGGTGAAAAAGGAAGTATCTTCACCTAAAAACCAGACAGAAAGATTTCTGAAAAACCTCTTTGTTATGTGTGAATTCATGTCACAGAATTCAACCTTTCTTTCACTTGAGCAGTTTGGAAACAGTCTTTGGTAGAAGATGCAGAGGGAAATTTCTTAGCTGCTTCAGGCCTATGGTGAAAAAGAAATATCTTCACAGAAAAACTAGACAGAAGCTTTCTGAGAAACTTCTTTGTGATGTGTCCATTCATCGCACAGAGTGAAACCTTTCTTTTGATTGAGGAGTTTGGAAAAGGTCTTTTCTTAGAATCTGCAAAGGGATATTTGTGAGCCCTTTATGGCCTTTGTTGAAATATGAAATATCTTCACGTAAAAAGTAGACAGAAGCTTTCTGACAAATTTCTTGGTGATGTGCACGTTTGTCACACGGAATTGAACCCTTCTTCTGATTGAGCAGTTTGGAATCAGTCTTTTTGTAGAATCTGTGAATGTGTATTTAGAGAGTTTTAAGGCCTAGGGTGCAAGAGGCAATGTCTTCACATAAAAACGACACAGTAGCATTTTGAGAAAACTCTTTGTGACATTTCCATTCATCTCTAATAGTTGGCCGTTTCCTTTCATTGAGCAGTTTGGAAGCAGTCTTTTTCTACAACCTGCAAAGGGATATTTCTGAGCGGTTTGGGGCCAACGGTGAAAAATAAATATCTTCCCATGAAAACTAGACAGAAGCATTTTGAGAAACTTCTTTTTGATGTGTGTATTCATCTCACAGATTTGAACCTTTCTTTAGATTTAGCAATTTGGAGAAAGTCTCTTGGTAGTATAAGTGGAGTTATATTTGCGAGCGGTTTAAGGCCTATGGTGCCAAAGGAAATACCTTCACATAAAATGCAGACAGAGGCTTTCCGAGAAACTTCTTTGTGATGTGTGCTTTCGTCTCACAGAGTTGTGCCTTTCTTTTGATTGACCAGTTTGGGAACATTCTTTTTGTAGAATCTGCAAATGGATATTTGGAGCAATTTGTGGCCTACGGTGAAAAAGGAAATATCTTCACAGAAAAACTAGACAGGCAGACTCCTGAGAAACTTCTTTTTGATGAGTGCATTCATTTCACATAGTTGAAACATGCCATAGGGGCCAGTTTGGAAACAGTCTTTTGGTAGAGTCTGCAGACAGATATTTTTGAGTGGCTTAAAGACTATGGTGAAAAAGGAAACATCTTCACATAGCAACCAGACAGAAGCAACCTGAGAAACTTCTTTGGGATGTGTTCATTCATCTCACAATGTTGAACGTTTCTTTTGATTGAGAAGTTTGTAAAGAGAACTTTTGTAGAATCCGCAAAGAGATATGTGTGAGTCCCTTGATTCCTATGGCAAAATAGGAATTATCTTGAGATAAAAGCGAGACAGAAGATTTCTGAGAAACTTTTTTGTGATGTGTGCTTTCATC

>D22Z5 Acc No. GJ212163.2

AGCTTTCTGAGCAAACTTCTTTGTGATGTGTGCATTCATCTCACAGTGTTGAAACTTTATTTTATTTGAGCAGTTTAGAGACAGACTTTTTCTGCAATCTGCAAAGGTATATTTCTGAGCCATTTGAGGTCTGTGGTGAAAAAGGAATATCTTCACATTTAAACTAGACAGAAGAATTCTGAGAAACTTCTTTATGATGTGTGCATTCATCTCAGGTAGGTGAAATTTTCTTTTGATGGAGCAGTTTGGAAACAGTCTTTTTCTAGTATCTGCAGAAGGATATTTGTGAGCGGTGTAAGGACTACGCTGAAAAAGGAAATATCTTCACATAAAAACTAGACAGAAGATTTCTGAGAAACTTTTTTGTGATGGGTGCTTTCATCTCACAGAGTTGAAAATTTCTTTTGATTGAGCAGTTTGGAAACAGTCTTTTCGTATCATCTGCAAAGGGATGTGTGGAGCGCTTTGTGGCCTAACGTGAAAATGGAAATATCTTCACATAAAATCTAGACAGAAGCATTCTGAGAAACTTCTTTGTGATGTGTTCATTCATCTCACAATGTTGAACGTTTCTTTTGATTGAGAGGTTTGTAAACACAACTTTTGTAGAATCTGCAAAGGGATATTTGTGAGCCCCTTGATTCCTATGGCAAAATAGGAATTATCTTGTCATAAAAACTAGACAGGAGAATTCTGAGAAACTTCTCTTTGATGAGTGCATTCATTTCACATAGTTGAAACATGCTATATGGGCCAGTTTGGAAACAGTCTTTTTGTAGGGTCTGCAGACAGATATTTTTGAGTGGCTTAAAGACTGTGGTGAAAAAAGAAATATCTTCACAGAGTAACCAGACAGAAGCTTTCTGAGAAACTTCTTTATGATGTGTGCTTTCGTCTCAGAGAGTTGAGCCTTTCTGTTGATTGACCAGTTTGGAAACATTCTTTCTGTAGAATCCGCAAATGGATATTTGGAGCAATTTGCGGCCTACGGTGAAGAAGGAAATATCTTCACATAAAAACTAGACAGAAGCATTTTGAGAAACTTCTTTTTGATGTGTGTATTCATCTCACAGAGTTGAACGTTTCTTTTGATTTAGCGATTTGGAGAAAGTCTCTTGGTAGTATAAGCGGAGTTATGTTTGTGAGTGGTTTAAGGCCTACGGTGCCAAAGGAAATACCTTCACATAAAATGTAGACAGAAGCATTTTGAGAGAACTCCTTGTGACATTTCCATTCATCTCTAATAGTTGACCATTTCTTCTCATTGAGCAGTTTGGAAACAGTCTTTTCCTACAAACTGCAAAGGGATATTTCTGAGCCGTTTGGGGCCAATGGTGAAAAATAAATATCTTCACATGAAAACTAGGCAGAAGCTTTCTGAGAAACTCCTTTGTGGTGTGCACGTTTGTATCACAGAGTTGAACCTTTCATTTGATTGAGCAGTTTGGAAACAGTCTTTTTGTAGAATCTGCAAATGTATATTTGGAGTGTTTTAAGGCCTATAGTGAAAAAGGAAATATCTTCACATAAAAACTACACAGTAGCTTTCTGAGAAACTTCTTTGTGATGTGTCCCTTCATCGCACAGAGTGAAACCTGTCTTTTGATTTAGGAGTTTGAAAAATGTCTTTTCTTAGAATCTGCAAAGGGATATTTGTGAGCCCTTTATGGCCTTTGTTGAAATATGAAATATCTTCACGTAAAAAGTAGAGAGAAAGATTTCTGAAAAACCTCTTTGTGATGTGTGAATT

>DXZ1 Acc No. X02418.1

GATCCGCAAGGGATATTTGGACCTCTTTGAAGGTTTCGTTGGAAACGGGATAATCTTCACCTAAAAGCTAAACGGAAGCATTCTCAGAAACTTCTTTGGGATGTTTGCATTCACCTCACAGAGTTGAAGTTTCCCTTTGATAGCGCAGTTTGACACACTTTTTCTACAATGTGCAAGTGGCTATTTAGCGGGCTTGGAGGACTGTGTTGGAAAAGGAAATATCTTCTCCTAAAAACGACATAGAAGCATTCTCAGAAACTGCTCTGTGATGATTGCATTCAACTCCCAGAGTTGAACATTCCTTTTGATAGAGCAGTTTGCAAACACTCTTTTTGTAGAATCTGCAAGTGGAGATTTGGACCGCTTTGAGGCCTGTGGTAGTGAAGGAAAGAACTTCATATAAAAACCAGACGGTAGCACTCTCAGAAAATTCTTTGTGACGATGGAGTTTAACTCAGGGAGCTGAACATTCGTTATGATGGAGCAGATTCCAAACACACGTTTTGTAGAATCTGCGAGGGGATATTTGGACTCTCTCTGAGGATTTCGTTGGAAACGGGATCACCTTCCCATAACTGAACGGAAAGCAAACTCAGAACATTCTTTGTGATGTTTGTATTCAACTCACAGAGTTGAACCTTCCTTTGATAGTTCAGGTTTGCAACACCCTTGTAGTAGAATCTGCAAGTGTATATTTTGACCACTTTGTAGCCTTCGTTTGAAACGTCTATATCTTCACATCAAACCTAGACAGAAGCATTCTCAGAAAGTTTTCTGCGATGACTGCATTCCACTCACAGAGTTGAACAATCCTTTGTGATGGAGCAGTTTTGAAACCCTCTTTCTTTGGAATCTGCAAGGGGATATGTGGACCTCTTTGAAGATTTCACTGGAAACGGGATCATCTTCACATAAAAACTAAACAGAAGCATTCTCGGAAACTATTTTGTGATGTTTGTATTCAACTCCCAGAGTTGAACTTTCCTTTTGAAAGAGCAGCTATGAAACACTCTTTTTCGAGAATCTGCAAGTGGACGTTTGGAGGGCTTTGAGGCTGTGGTGGAAAAGGAAATATCTTCACACAAAAACCAGATAGAAGCATTCTCAGAAACGACTTTGTGAGGATGGCATTCAACTACTGGAGTTGACAATCCTATTGATAGAGCAGATTGGAATCACTCTTTTTGTAGAATCTGCAAATGGAGATTTGGACTGCTTTGAGGCCTACGGTGGTACAGGAAGGAACTTCATATAAAAGGCAAACGGAAGCATTCTCAGAATATTCTTTGTGATGATGGAGTTTCACTCACAGAGCTGAACATGCCTTTTGATGGAGCAGTTTCCAAATACACTTTTGGTAGAATCTGCAGGTGGATATTTGGAGCTCTCTGAGGATTTCGTTGGAAACGGGAATAATTTCCCATAACTAAACACAAACAATCTGAGAAAGTTCTTCATGATGAATGCATTTAACTCGCAGAGATGAACCTGCCTTTGAGAGTTCAGGTTCGAAACACTCTTTCTGTAGAATCTGCAAGTGGATATTTGGACCACTGGGTGCCTTCGTTCGAAACGGGTATATGCTCACGTAAAAACTAAAGAGAAGCATTCTCAGAAACTTCTGAGTGATGATTGCATTCAAGTCACACAGTTGAACCCTCCTTTTGATGGAGCAGTTTTGAAACTGTCTTTTTGTAGAATCTGTAAGTGGATACGTGGACCTCTTTGAAGATTTCTTTGGAATCGGGAATATTTCCACAGAAAAACTAAACTGAAGCATTCTCAGAAACTGCTTTGTGGTGTTTGTGTTCGAGCCGCAGAGTTTAACATTGCTTTTCATAGAGCAGTTTTGAAATATTCTTTTGGCAGAATCTGCAAGTGGACATTTGGAGCGCTTTCAGGCCTGTGGTGGAAAAGCCTGAAAGCCTTTTCGCTTTATCTTCACAGAAAGACGAGAGAGAAGCATTGTCAGAAACTTCTTTGTGATGATTGCATTCAACTCACAGAGTTGAAGATTCCTTTTGAAACAGCAGTTTCGAAACACTCTTTCTGTGG

>DYZ3 Acc No. M29723.1

TTTAAAGTGTCTTTCTGTAGAGTCTGCAAGTGGTTACTTGGAGACCTTTGTGGAAGATGGTGGAAAAGGAAATATCTTCCCGTAAAAACTACACAGATGCATTCTGAGAAACTTCTTTGTGATGTGTGCATTCATCTCACAGAGTTCAACCTATCTTTTCGTAGAGCAGTTTTGAAACTCTCTTTTCCTAGAATCTGTAAGTTGATATTTGGAGCCCTTTGCGGCCTATTGTGGAAAAGGAAATAACTTCACATGAAAACTACACAGAAGCTGAGAAACTTCTTTGTGATGTGTGCATTAATTTCCCAGAGTCGAACCTTTCTTTTGATTGAGCAGTTTTGAAACACTCTTTTTGTAGAATCTGCAAGTGGACATTTGAAGCACTTTGAGGCCTATTGTTGAAAAGGAAACATCTTCATATAAAAACAACAAGGAAGCATTCTGAGAAACCATTTTGTGCTGTGTGCATTCACCTCACAGAGTTCAACTTTATTTGATACAGCAGTTTTGAAACACTCTTCTTGTGGAATCTGCAAGTGGAAATTGGGAAATATTTAGGCATATGGTGGAAAAGGAAACATCCGCACATAAAAACTACACAGACACATTCTGTGAAACTTCTTTGTGCTGTGTGCATTCAAACCACAGAGTTGAACCTATCTTTTGAATGAGCAGTTTTGAAACTCTCTTTTCATAGTATCTGCAAGTGGATATTTGGAGCCTTTTGTGGCCTACGGTGGGAAAGGAAATATCTTCATATAAAAACTACACAGAAGCATTCTGAGAAACTTCTCAGTGATGTGAGCATTCTTCTCACAGAGTTGAACTATCTTTTGATTGAGCAGTTTTGAAACACTGTTTTTTTAGAATCTGCAAGTGAATATTTGGAGCCTTTTGGGTCTATTGTGGAAAAGGAAATATCTTCATATAAAAACTACACAGAAGCATTCTGAGACACTTCTTTGTGGTATGTGCATTCATCTCACAGAGGTGAAGCTTTCTTTTGATGGAGCAGTTTTGGAAAACTCTTTTTGTAGAATCTGCAAGTGGATATTTGGAGCACTTTGAGGCCCATTGTGGAAAAGGAAATATCTTCACATAAAAACTACACAGAAATAATTCGAGAAACATCTTTTTGTTGTGTGCATTCAACTCACAGAGTTGAACTATCTTTTGATTGTGCAGTTTTGAAACACTCTTTTTGTAGAATGTGAAAGTGGATATTTTGAGCGCTTTGAGGCCTATTGTGGAAAAAGAAATATCTTCAATTAAAAACTACACAGAAGCATTCTGAGAAACTTCTTTGTCATGTGTGGATTCATCTCACAGAGTTAAATCTTTCTTTTGATTGAGCAGTTTGAAACACTCTTTTTGTGGTATCTCCAGGAGGATATTTGGAGTGCTTTGAGGCCTATGTTGGAAAAGGAAGTATCTTCCCTTAAAAGCTATGCAGAAGCATTCTGAGAAACTTCCTTCTGATGTGTGCATTCATCTCACCTAGTTGAACCTTTCTTTTGGTTGTGCACTTTTGAAACACTCTTTTTGTGGAATCTGCAAGTGGATATCTGGATCACTTTGACGTCTATTGTGGAAAAGGAAATATCTTCACATAAAAACTACACAGAAGAATTCCGACATAGTTCTTTGTGATGTGTGCATTCAACTCACATAGTTGAAACCATCTCTTGATCGAGTAGTTTTGAACCTCTCTTGTTGTAGAATCTGAAAGTGGATATTTGTGTCCCCTGGCGGTCTATGGTGGAAAAGAAATATCTTCACAAAAATACTACACAGAAGCATTCTGAGAAACTTCTTTGTGATGTGTCCATTCATCCCACAGAGTTGAACCTTTCTTTTGATTGAGCAGTTTTGAAATACTCCTTTTGTAGAATCTGCAAGTGGATATTTTGAGTGCTTTGAGAACTATTGTGGAAAAGGAATTATCTTCTCATAAAACCTACACTGAAGGATTCTGAGAAATTTCTTGTGATGTGTGCATTCATCTCACAGAGTTGAACATTTCCTATGATTGAGCAGTTTGAAATATTCTTTTCATAGAATCTGGAAGTGGATATTTGGAGCCCTTTGAGGCCTATTGTGGAAAAGGAAATATCTTCACATAAAAACTACAGAGAAGCATTCTGAGAAACTTCTTTGTGATGTGTGCATTCATCAAACAGAATTGAACATTTCTTTTTTTGTGCAGTTTTGAAACAATCTTCTTGTAGTATCTGCAAGTGGATATTTGGAGCGTTTTAAGACCTAAGGTGGGAAAGGAAATATCTTCACATAAAAATTACACAGAGAGATTCTGAGAAACTTCTTTGTGATGTGTGCATTCATCTCATATATTTGAACCTTTCTTTTCATTGTGCAGTTTCAAGCAATCTTTTTCTAGA

>p82H h3

AAGCTTTGAGACTATGGTGGAAAAGGAAATACCTTAGATAAAAACCAGACAGAAGCATTCTCAGAAACTTCTTTGTGATGTTTGCATTCAACTCACAGAGTTGAATGTAAACTTTTCAAGAGCATGTTTTGAAACACTCATTTCGTAGAATCTGCAACTGGATATTTGGACTGTGTTGAGGCCTACGGTGGAAAGGAGATACCTTAGATAAAAACCAGACAGAAGCATTCTCAGAAACTTCTTTGTGATGTTTGCATTCAACTCACAGAGTTGAATGTAAACTTTTCAAGAGCATGTTTTGAAACACTCATTTCGTAGAATCTGCAACTGGATATTTGGACTGTGTTGAGGCCTTCGTTGGAAACGGGAATACGGTGGAAAGGAGATATACCTTAGATAAAAACCAGACAGAAGCATTCTCAGAAACTTCTTTGTGATGTTTGCATTCAACTCACAGAGTTGAATGTAAACTTTTCAAGAGCATGTTTTGAAACACTCATTTCGTAGAATCTGCAACTGGATATTTGGACTGTGTTGA
