# Supplementary material for: Rapid molecular assays to study human centromere genomics
Source: HighWire-hosted journal article supplement (doi:10.1101/gr.219709.116), 2017-11-15
Supplement: Supplemental_Table_S1.docx [file Supplemental_Table_S1.docx]

Supplemental Table 1: List of Primers

| D1Z5Fb | GAGAATTTCGTTGGAAACGGATAAAACC |
| --- | --- |
| D1Z5Rb | ATCCACTTGCAGATACTACGAAA |
| D1Z5Fc | GGCCTATCGTCGTAAAGGAAATA |
| D1Z5Rc | ATGCTCAGCTCTGTGAGTTAAA |
| D1Z7/D5Z2 | GTTCCCTTAGACAGAGCAGATTT |
| D1Z7/D5Z2 | CAACGCAGTTTGTGGGAATG |
| D2Z1F | TCGTTGGAAACGGGATTGT |
| D2Z1R | CTGCTCTATGAAAGGGACTGTT |
| D3Z1F | GCTTTGAGGCCAATGGTAGA |
| D3Z1R | GTTGAACACACACGTACCAAAG |
| D4Z1F | CTGTAGTATCTGGAAGTGGACATT |
| D4Z1R | GGTTCAACTGTGTTCGTTTAGG |
| D5Z1 | AGTCTGCACGTGGATAAGTTG |
| D5Z1 | AAAGAGTGTTAGAAGTCTGCTCTG |
| D6Z1F | ACGGAAGCAATCTCAGAACTAC |
| D6Z1R | CCTCAAGGCGGTCCAATTAT |
| D7Z1F | GTGGATATATGGACCGCATTGA |
| D7Z1R | CACACAGCACAAAGAAGTTACTG |
| D7Z2F | CGACTTTGTGATGTGTGCATTC |
| D7Z2R | CCTTATCCGCAATGGTCCTAAA |
| D8Z2F | ACGTACACAGCAGCATACTC |
| D8Z2R | GTCCACTTCCAGATACTCCAAA |
| D9Z4F | GGAGAAGCATTCTCAGGAACTT |
| D9Z4R | GTCCGCTTGCAGATACTACAG |
| D10Z1F | TTGGAAACGGGATTTCCTCATA |
| D10Z1R | GCTCTCTCTAAAGGAAGGTTCAA |
| D11Z1F | CTTCCTTCGAAACGGGTATATCT |
| D11Z1R | GCTCCATCAGCAGGATTGT |
| D12Z3F | GATGAAGGAGTTTGGAGACACT |
| D12Z3R | CTGTCGAACATTACAGGAAGAAATC |
| D13Z1F LNA | GTGATGTGTGTACCCAG+C+T+AAA |
| D13Z1/D21Z1R | AACGAAATCCTCCAAGCTATCC |
| D13Z1F LNA Clamp | GTGATGTGTGTACCCAG+C+T+AAA/3Phos/ |
| D13Z1F | TGATGTGTGTACCCAGCT |
| D13Z1R | GCTATCCAAATATCCACT |
| D13Z2F | CAGAGGGCTTTGTGGAGTATAG |
| D13Z2R | ACGTTGAATGCACACATCAC |
| D13Z3F | GGAATATTTGTGAGCCCATTGAG |
| D13Z3R | TTCAACCCTGTGAGTAGAAGTC |
| D13Z6F | CTTCGTCGGAAACGGGAATA |
| D13Z6R | CAAACTGCTCTATCAACAGAAAGG |
| D13Z7F | ACTTCTTTGTGATGTGTGCATTC |
| D13Z7R | AGGGCTCCAAATATCCAGTTG |
| D13Z8F | TCTCACAGAGTTGAACCTATCTTATG |
| D13Z8R | TTTCCACAGTAGGCCTCAAAG |
| D13Z9F | TGTGATGCGTGTACTCATCTTAC |
| D13Z9R | GCCTCAAGGCGCTCAAA |
| D14Z1/D22Z1F | CAATCTCAGAATCTTCTTTGGGATA |
| D14Z1/D22Z1R | CCAAGCTATCCAAATATCCACTT |
| D14Z2F | GATTTCGTTGGAAACGGGATTAC |
| D14Z2R | AGAAAGATCCACGCCTGTTA |
| D14Z3/D22Z6F | GTGCGTGCATTCATGTCATAG |
| D14Z3/D22Z6R | GTCCTCAAAGGGCTCCAATTA |
| D15Z3F | GACATTTGGATAGCTTTGAGGATTT |
| D15Z3R | GGGCATACATCACAAGGAAGA |
| D16Z2F | CCTTCCTTTAGACAGAGCAGATT |
| D16Z2R | AGTGTCTGGGAACGAGTTTG |
| D17Z1F | GTGGAGATATGGACCGCTTTAG |
| D17Z1R | CTCAGTCGTCACCAAGAGTTT |
| D17Z1bF | TTTCGTAGGGTCTGCAAGTG |
| D17Z1bR | CCGACAATGCTTCTCTCTAGTT |
| D18Z1F | TGGGAAACGGGATTGTCTTC |
| D18Z1R | CTGCTCTACCAAAGGGAATGT |
| D18Z2F | TTCGATCGATTTCAGGCCTATG |
| D18Z2R | TTGAGGACACACATCACAAAGA |
| D19Z4F | CTAAAGACCTCAATGGGCTCAG |
| D19Z4R | GTGGATTCATCTCACAGACGTTA |
| D19Z5F | GCCTCAATGGGTTCAGAAATG |
| D19Z5R | TGGATCCATCTCACAGATTTCA |
| D20Z2F | TGCTTGGAAACGGGAATGT |
| D20Z2R | CCTGCTCTATGAAAGGGAATGT |
| D21Z1F | TGATGTGTGTACCCAGCC |
| D21Z1R | GCTATCCAAATATCCACC |
| D21Z1F LNA | GTGATGTGTGTACCCAG+C+C+AAA |
| D21Z1R LNA | CCTCCAAGCTATCCAAATATCC+A+C+TTGCA |
| D22Z4F1 | CATTCTGACGTGGGCATTAAAC |
| D22Z4R1 | GTAGGCCTCAAAGGCTAGAAAT |
| D22Z4F2 | TGACCAGTTTGGGAACATTCT |
| D22Z4R2 | AGGAGTCTGCCTGTCTAGTT |
| D22Z5F | TCATCGCACAGAGTGAAACC |
| D22Z5R | GCCATAAAGGGCTCACAAATATC |
| DXZ1F | CGGGATCACCTTCCCATAAC |
| DXZ1R | GGTGTTGCAAACCTGAACTATC |
| DYZ3F | CTGCAAGTGGAAATTGGGAAATA |
| DYZ3R | GAATGCACACAGCACAAAGAA |
| p82HF | ATGTTTGCATTCAACTCACAGAG |
| p82HR | CAACACAGTCCAAATATCCAGTTG |
| *CCR*5F | CAATGTGTCAACTCTTGACAGG |
| *CCR*5R | ACCTGCATAGCTTGGTCCAACC |
| *DEK* exon 3F | TCCTATCCACGTACTTCAGGCTG |
| *DEK* exon 3R | GCCTGGCCTGTAGTAAAGCAGTTT |
| *ACTNB*F | CCCTGAGGCACTCTTC |
| *ACTNB*R | GTGCACGTCACACTT |
| *GAPDH*F | CCACTCCTCCACCTTTGAC |
| *GAPDH*R | ACCCTGTTGCTGTAGCCA |
| *TOP3A*F | ACTAGGTCAGAGACCCTTACTG |
| *TOP3A*R | CAAGGAGAGGCAGTGACAAA |
| K111F | AAGAGCACCAGGATGCTTAATGCC |
| K111R | AGTGACATCCCGCTTACCATGTGA |
| K111P | FAM-TGCCGGTCCTAACAGTAGACTCAC-BHQ1 |
| K222F | CAGCGTTCTGGAATCCTATGT |
| K222R | TGTATTGTGGTAACTGGGTATATGT |
| K222P | FAM- ACCCACATGGCAGTGTTCTGGATT-BHQ1 |
| K111 1584F | TCCTTAAGGTCATAGTGGAGTTGTTGGTATAC |
| K111 1707R LNA | CATAAGCATAGCTTTATG+C+A+AAC |
| P1 | ACATTCAGACCATGGTAGCCGTGT |
| P4 | GTACCTTCACCCTAGAGAAAAGCCT |

+ Indicates locked nucleic acid analog bases in which the ribose ring is “locked”, exhibiting higher melting temperatures upon binding.
