# Supplementary material for: Rapid molecular assays to study human centromere genomics
Source: HighWire-hosted journal article supplement (doi:10.1101/gr.219709.116), 2017-11-15
Supplement: Supplemental_Table_S2.docx [file Supplemental_Table_S2.docx]

Supplemental Table 2: Assays for detecting arrays specific for each human chromosome

| α-repeat array | Accession Number | Chromosomes  reported | Chromosomes detected by PCR without optimization | Chromosomes detected by optimized assay | Conditions  (cycles, annealing T°) |
| --- | --- | --- | --- | --- | --- |
| D1Z5-1 | BX248407.26 | 1 | 1 | 1 | 25, 60°C |
| D1Z5-2 | BX248407.26 | 1 | 1 | 1 | 25, 60°C |
| D1Z7/D5Z2/D19Z3 | AJ295044.1 | 1,5,19 | 1,5,19,22,Y | 1,5 | 16, 62°C |
| D2Z1 | J04773.1 | 2 | 2 | 2 | 20, 60°C |
| D3Z1 | Z12006.1 | 3 | 3 | 3 | 20, 60°C |
| D4Z1 | Z12011.1 | 4 | 4,Y | 4 | 16, 62°C |
| D5Z1/D19Z2 | M26920.1 | 5,19 | 5,Y | 5 | 16, 60°C |
| D6Z1 | GJ211907.1 | 6 | 6 | 6 | 20, 60°C |
| D7Z1 | AC142529.3 | 7 | 7,Y | 7 | 18, 62°C |
| D7Z2 | M16037.1 | 7 | 7,Y | 7 | 20, 61°C |
| D8Z2 | M64779.1 | 8 | 8 | 8 | 25, 60°C |
| D9Z4 | M64320.1 | 9,4 | 9,4,Y | 9 | 16, 62°C |
| D10Z1 | X63622.1 | 10 | 10,12,16,22 | 10 | 18, 62°C |
| D11Z1 | M21452.1 | 11 | 11 | 11 | 25, 60°C |
| D12Z3 | M28221.1 | 12 | 12 | 12 | 16, 56°C |
| D13Z1/D21Z1 | D29750.1 | 13,21 | 13,15,21,Y | 13 | 20, 61°C |
| D13Z1 LNA | D29750.1 | 13,21 | 13 | 13 | 20, 68°C* |
| D13Z2# | GJ211955.2 | 13,14,21,22 | 13,14,21,22 | 13,14,21,22 | 25, 60°C |
| D13Z3# | GJ211961.2 | 13,14,21,22 | 13,14,21,22 | 13,14,21,22 | 25, 60°C |
| D13Z6# | GJ211965.2 | 13,14,21,22 | 13,14,21 | 13,14,21 | 25, 60°C |
| D13Z7# | GJ211967.2 | 13,14,21,22 | 13,14,21,22 | 13,14,21,22 | 25, 60°C |
| D13Z8# | GJ211968.2 | 13,14,21,22 | 13,14,21,22 | 13,14,21,22 | 25, 60°C |
| D13Z9# | GJ211969.2 | 13,14,21,22 | 13,14,21,22 | 13,14,21,22 | 25, 60°C |
| D14Z1/D22Z1 | M22273.1 | 14,22 | 14,22 | 14,22 | 20, 60°C |
| D14Z2# | GJ211972.2 | 13,14,21,22 | 14 | 14 | 25, 60°C |
| D14Z3/D22Z6# | GJ211986.2 | 13,14,21,22 | 14,22 | 14,22 | 25, 60°C |
| D15Z3 | AF237720.1 | 15 | 15,8,22 | 15 | 22, 64°C |
| D16Z2 | M58446.1 | 16 | 16 | 16 | 25, 60°C |
| D17Z1 | M13882.1 | 17 | 17,22,Y | 17 | 20, 61°C |
| D171b | GJ212053.1 | 17 | 17 | 17 | 25, 60°C |
| D18Z1 | M65181.1 | 18 | 18,Y | 18 | 18, 64°C |
| D18Z2 | M65182.1 | 18 | 18,Y | 18 | 20, 62°C |
| D19Z4/D22Z6# | AC004164 | 19 | 19,22 | 19,22 | 25, 60°C |
| D19Z5/D22Z7# | AC006504 | 19 | 19,22 | 19,22 | 25, 60°C |
| D20Z2 | X58269.1 | 20 | 20 | 20 | 18, 60°C |
| D21Z1/D13Z1 | D29750.1 | 13,21 | 13,15,21,Y | 13,15,21 | 20, 62°C |
| D21Z1LNA/D13clamp | D29750.1 | 13,21 | 13,21,Y | 21 | 20, 64°C* |
| D22Z4-1# | GJ212162.2 | 22 | 22 | 22 | 25, 60°C |
| D22Z4-2# | GJ212162.2 | 13,14,21,22 | 22 | 22 | 25, 60°C |
| D22Z5# | GJ212163.2 | 13,14,21,22 | 22 | 22 | 25, 60°C |
| DXZ1 | X02418.1 | X | X | X | 25, 60°C |
| DYZ3 | GJ212193.1 | Y | Y | Y | 25, 60°C |
| P82H | Mitchell et al. 1985 | All | All | All | 25, 60°C |

* Optimal LNA assay performance was obtained using ramp speed cycles. #Pericentromeric sequences
