# Supplementary material for: Rapid molecular assays to study human centromere genomics
Source: HighWire-hosted journal article supplement (doi:10.1101/gr.219709.116), 2017-11-15
Supplement: Supplemental_Table_S3.docx [file Supplemental_Table_S3.docx]

Supplemental Table 3: Types of CENPB Boxes found in human centromere α-repeats

| α-repeat | CENPBox 1  C*TTCGTTGGAA*AC*GG*GA | CENPBox 2 C*TTCGTTGGAA*AC*GG*GT | | CENPBox 3  T*TTCGTTGGAA*GC*GG*GA | | CENPBox 4 T*TTCGTTGGAA*AC*GG*GA | |
| --- | --- | --- | --- | --- | --- | --- | --- |
| D1Z5-1 |  | |  | |  | | ✔ |
| D1Z5-2 |  | |  | |  | | ✔ |
| D1Z7/D5Z2/D19Z3 | ✔ | |  | |  | |  |
| D2Z1 |  | |  | |  | | ✔ |
| D3Z1 | ✔ | |  | |  | | ✔ |
| D4Z1 |  | |  | |  | | ✔ |
| D5Z1/D19Z2 |  | | ✔ | |  | |  |
| D6Z1 | ✔ | |  | |  | |  |
| D7Z1 | ✔ | |  | |  | |  |
| D7Z2 | ✔ | |  | |  | |  |
| D8Z2 |  | |  | |  | | ✔ |
| D9Z4 |  | |  | |  | | ✔ |
| D10Z1 | ✔ | |  | |  | |  |
| D11Z1 |  | |  | |  | | ✔ |
| D12Z3 | ✔ | |  | |  | |  |
| D13Z1/D21Z1 |  | |  | | ✔ | | ✔ |
| D13Z2 |  | |  | |  | |  |
| D13Z3 |  | |  | |  | |  |
| D13Z6 | ✔ | |  | |  | |  |
| D13Z7 |  | |  | |  | |  |
| D13Z8 |  | |  | |  | |  |
| D13Z9 |  | |  | |  | |  |
| D14Z1/D22Z1 |  | |  | |  | | ✔ |
| D14Z2 |  | |  | |  | | ✔ |
| D14Z3/D22Z6 |  | |  | |  | |  |
| D15Z3 |  | |  | | ✔ | | ✔ |
| D16Z2 | ✔ | |  | |  | |  |
| D17Z1 |  | |  | |  | | ✔ |
| D171b |  | |  | |  | | ✔ |
| D18Z1 |  | |  | | ✔ | | ✔ |
| D18Z2 |  | |  | |  | | ✔ |
| D19Z4 |  | |  | |  | |  |
| D19Z5 |  | |  | |  | |  |
| D20Z2 |  | |  | |  | | ✔ |
| D21Z1/D13Z1 |  | |  | | ✔ | | ✔ |
| D22Z4-1 |  | |  | |  | |  |
| D22Z4-2 |  | |  | |  | |  |
| D22Z5 |  | |  | |  | |  |
| DXZ1 |  | |  | |  | | ✔ |
| DYZ3 |  | |  | |  | |  |
| P82H | ✔ | |  | |  | |  |
