# Supplementary material for: Rapid molecular assays to study human centromere genomics
Source: HighWire-hosted journal article supplement (doi:10.1101/gr.219709.116), 2017-11-15
Supplement: Supplemental_Table_S4.xlsx [file Supplemental_Table_S4.xlsx]

## Sheet: Sheet1
Figure 2B
				log10 values
	PCR	1000 genomes		PCR	1000 genomes
D1Z5	679.923	749.134		2.83246	2.87456
D2Z1	35046.9	26388.3		4.54465	4.42141
D3Z1	17136.7	22880.3		4.23393	4.35946
D4Z1	949.032	10918.8		2.97728	4.03818
D5Z1	8060.23	22710.3		3.90635	4.35622
D6Z1	8353.57	21373.4		3.92187	4.32987
D7Z1	69502.4	15904.6		4.842	4.20152		Pearson r
D7Z2	48.1742	1089.59		1.68281	3.03726		r	0.833
D8Z2	22144.9	16797.1		4.34527	4.22524		95% confidence interval	0.6715 to 0.919
D9Z4	20720.2	2657.06		4.31639	3.4244		R squared	0.6939
D10Z1	14103.3	9029.7		4.14932	3.95567
D11Z1	39224.6	5853.09		4.59356	3.76739		P value
D12Z3	205.066	9597.78		2.31189	3.98217		P (one-tailed)	<0.0001
D13Z1/D21Z1	26495.3	16696.1		4.42317	4.22262		P value summary	****
D14Z1/D22Z1	74037.1	2070.11		4.86945	3.31599		Significant? (alpha = 0.05)	Yes
D15Z3	268.196	10144.9		2.42845	4.00625
D16Z2	14730.8	30258.1		4.16823	4.48084		Number of XY Pairs	29
D17Z1	916.3	12596.3		2.96204	4.10024
D18Z1	47908.3	19852		4.68041	4.2978
D18Z2	2858.18	2020.46		3.45609	3.30545
D19Z4	33.8323	15.3621		1.52933	1.18645
D19Z5	1.46322	0.452522		0.165311	-0.34436
D20Z2	95484.1	12038.7		4.97993	4.08058
D21Z1	9342.42	7978.66		3.97046	3.90193
D22Z4	9.28993	160.69		0.968012	2.20599
DXZ1	6780.22	5769.39		3.83124	3.76113
DYZ3	525.787	931.462		2.72081	2.96917
K222	24.0204	4.96021		1.38058	0.6955
Top3A	2.00041	2.00005		0.301118	0.301041
				log values
	PCR	Southern Blot		PCR	Souther blot
D1Z5	679.9	2573		2.83245	3.41044		Pearson r
D2Z1	35046.9	36842		4.54465	4.56634		r	0.8458
D3Z1	17136.7	19923		4.23393	4.29935		95% confidence interval	0.6907 to 0.9265
D4Z1	949	18713		2.97727	4.27214		R squared	0.7154
D5Z1	8060.2	26900		3.90635	4.42975
D6Z1	8353.6	17543		3.92187	4.2441		P value
D7Z1	69502.4	22280		4.842	4.34792		P (one-tailed)	<0.0001
D7Z2	48.2	584		1.68305	2.76641		P value summary	****
D8Z2	22144.9	14912		4.34527	4.17354		Significant? (alpha = 0.05)	Yes
D9Z4	20720.3	15789		4.3164	4.19835
D10Z1	14103.3	12865		4.14932	4.10941		Number of XY Pairs	28
D11Z1	39224.6	27836		4.59356	4.44461
D12Z3	205.1	8187		2.31197	3.91312
D13Z1/D21Z1	26495.3	13450		4.42317	4.12872
D14Z1/D22Z1	74037.2	13450		4.86945	4.12872
D15Z3	268.2	14619		2.42846	4.16492
D16Z2	14730.8	11695		4.16823	4.068
D17Z1	916.3	15789		2.96204	4.19835
D18Z1	47908.3	7953		4.68041	3.90053
D18Z2	2858.2	9941		3.45609	3.99743
D19Z4	33.8	45		1.52892	1.65321
D19Z5	1.5	11		0.176091	1.04139
D20Z2	95484.1	5964		4.97993	3.77554
D21Z1	9342.4	10438		3.97046	4.01862
D22Z4	9.3	316		0.968483	2.49969
DXZ1	6780.2	14941		3.83124	4.17438
DYZ3	525.8	3815		2.72082	3.58149
Top3A	2	2		0.30103	0.30103
Figure 3A
CENP-A			IgG
Recovery	SD			Recovery	SD				Significant?	P value	Mean1	Mean2	Difference	SE of difference	t ratio	df	Adjusted P Value
2.213	0.154			2.293	0.383			D1Z5-1	No	0.754	2.213	2.293	-0.08	0.2383	0.3357	4	0.985
2.06	1.122			0.152	0.00765			D1Z5-2	No	0.042	2.06	0.152	1.908	0.6478	2.945	4	0.292
14.91	0.482			2.064	0.142			D1Z7/D5Z2	Yes	<.001	14.91	2.064	12.85	0.2901	44.28	4	<.001
22.33	2.903			1.138	0.0496			D2Z1	Yes	<.001	22.33	1.138	21.19	1.676	12.64	4	0.005
28.832	5.907			1.486	0.961			D3Z1	Yes	0.001	28.83	1.486	27.35	3.455	7.914	4	0.02
16.61	4.479			0.0503	0.032			D4Z1	Yes	0.003	16.61	0.0503	16.56	2.586	6.404	4	0.036
14.621	1.986			1.244	0.0342			D5Z1	Yes	<.001	14.62	1.244	13.38	1.147	11.66	4	0.006
27.189	5.545			3.386	1.365			D6Z1	Yes	0.002	27.19	3.386	23.8	3.297	7.22	4	0.025
32.973	9.327			3.148	0.382			D7Z1	Yes	0.002	32.97	3.148	29.83	5.564	5.36	6	0.022
1.863	0.212			1.617	0.436			D7Z2	No	0.429	1.863	1.617	0.246	0.2799	0.8789	4	0.894
42.176	0.537			1.662	0.359			D8Z2	Yes	<.001	42.18	1.662	40.51	0.3729	108.6	4	<.001
23.247	1.321			1.26	0.0284			D9Z4	Yes	<.001	23.25	1.26	21.99	0.7629	28.82	4	<.001
40.043	1.766			1.552	0.943			D10Z1	Yes	<.001	40.04	1.552	38.49	1.156	33.3	4	<.001
11.372	1.594			1.246	0.208			D11Z1	Yes	<.001	11.37	1.246	10.13	0.9281	10.91	4	0.008
5.809	0.577			0.242	0.0356			D12Z3	Yes	<.001	5.809	0.242	5.567	0.3338	16.68	4	0.002
23.441	2.523			0.66	0.663			D13Z1	Yes	<.001	23.44	0.66	22.78	1.506	15.13	4	0.003
25.442	1.259			1.403	0.397			D14Z1/D22Z1	Yes	<.001	25.44	1.403	24.04	0.7622	31.54	4	<.001
7.936	1.504			0.46	0.207			D14Z2	No	0.02	7.936	0.46	7.476	1.074	6.964	2	0.199
24.643	1.195			0.952	0.267			D15Z3	Yes	<.001	24.64	0.952	23.69	0.7069	33.51	4	<.001
28	1.125			1.261	0.126			D16Z2	Yes	<.001	28	1.261	26.74	0.6536	40.91	4	<.001
19.994	4.212			9.971	0.981			D17Z1	Yes	<.001	19.99	8.971	11.02	2.184	5.047	8	0.017
8.124	0.517			1.606	0.511			D17Z1b	No	0.006	8.124	1.606	6.518	0.514	12.68	2	0.06
20.469	0.843			1.925	0.398			D18Z1	Yes	<.001	20.47	1.925	18.54	0.5382	34.45	4	<.001
2.803	0.454			1.604	0.147			D18Z2	No	0.012	2.803	1.604	1.199	0.2755	4.352	4	0.115
1.887	0			1.887	0			D19Z4	No	>.999	1.887	1.887	0	0.0006928	0	4	>.999
3.059	0.084			4.051	1.163			D19Z5	No	0.215	3.059	4.051	-0.992	0.6732	1.474	4	0.765
15.393	2.784			1.121	0.1			D20Z2	Yes	<.001	15.39	1.121	14.27	1.608	8.874	4	0.015
37.549	1.895			1.273	0.115			D21Z1	Yes	<.001	37.55	1.273	36.28	1.096	33.1	4	<.001
3.601	0.568			0.89	0.177			D22Z4	No	0.023	3.601	0.89	2.711	0.4207	6.444	2	0.21
2.456	0.781			1.53	0.47			D22Z5	No	0.153	2.456	1.53	0.926	0.5263	1.76	4	0.688
23.499	2.964			1.485	0.0822			DXZ1	Yes	<.001	23.5	1.485	22.01	1.712	12.86	4	0.005
72.1	12.343			2.642	1.315			DYZ3	Yes	<.001	72.1	2.642	69.46	7.167	9.692	4	0.011
19.304	2.388			1.69	0.454			p82H	Yes	<.001	19.3	1.69	17.61	1.403	12.55	4	0.005
0.764	0.36			0.764	0.36			Top3A	No	>.999	0.764	0.764	0	0.2939	0	4	>.999
1.165	0.549			0.777	0			b-actin	No	0.288	1.165	0.777	0.388	0.317	1.224	4	0.817
0.865	0.408			0.865	0.408			GAPDH	No	>.999	0.865	0.865	0	0.3331	0	4	>.999
Figure 3B
CENPB				IgG
Recovery	SD			Recovery	SD				Significant?	P value	Mean1	Mean2	Difference	SE of difference	t ratio	df	Adjusted P Value
52.0761	1.17			0.006347	0.00933			D1Z5-1	Yes	<.001	52.08	0.006347	52.07	0.8273	62.94	2	0.005
28.0076	0.08777			0.014531	0.04397			D1Z5-2	Yes	<.001	28.01	0.01453	27.99	0.06942	403.3	2	<.001
43.0931	0.12886			0.013866	0.01296			D1Z7/D5Z2	Yes	<.001	43.09	0.01387	43.08	0.09158	470.4	2	<.001
65.3913	0.15029			0.013026	0.0097			D2Z1	Yes	<.001	65.39	0.01303	65.38	0.1065	613.9	2	<.001
39.3908	0.39858			0.012747	0.00594			D3Z1	Yes	<.001	39.39	0.01275	39.38	0.2819	139.7	2	0.002
35.4802	0.37693			0.011063	0.00363			D4Z1	Yes	<.001	35.48	0.01106	35.47	0.2665	133.1	2	0.002
40.8478	1.67366			0.009364	0.0056			D5Z1	Yes	<.001	40.85	0.009364	40.84	1.183	34.51	2	0.012
59.6148	1.25165			0.00902	0.02275			D6Z1	Yes	<.001	59.61	0.00902	59.61	0.8852	67.34	2	0.005
50.1878	3.49254			0.012703	0.02883			D7Z1	Yes	0.002	50.19	0.0127	50.18	2.47	20.32	2	0.022
1.66594	0.05774			0.010123	0.03607			D7Z2	Yes	<.001	1.666	0.01012	1.656	0.04814	34.4	2	0.012
77.7388	2.27488			0.013783	0.02453			D8Z2	Yes	<.001	77.74	0.01378	77.73	1.609	48.32	2	0.008
22.0664	0.78339			0.013809	0.00332			D9Z4	Yes	<.001	22.07	0.01381	22.05	0.5539	39.81	2	0.009
41.0907	1.35224			0.01357	0.00206			D10Z1	Yes	<.001	41.09	0.01357	41.08	0.9562	42.96	2	0.009
94.2264	1.61178			0.009246	0.00914			D11Z1	Yes	<.001	94.23	0.009246	94.22	1.14	82.67	2	0.003
67.8979	2.30616			0.007241	0.01278			D12Z3	Yes	<.001	67.9	0.007241	67.89	1.631	41.63	2	0.009
120.102	5.89098			0.002942	0.003			D13Z1	Yes	0.001	120.1	0.002942	120.1	4.166	28.83	2	0.012
47.4424	0.38927			0.014949	0.00323			D14Z1/D22Z1	Yes	<.001	47.44	0.01495	47.43	0.2753	172.3	2	0.001
77.9163	0.29451			0.00382	0.00619			D14Z2	Yes	<.001	77.92	0.00382	77.91	0.2083	374	2	<.001
31.0889	0.07142			0.01019	0.02337			D15Z3	Yes	<.001	31.09	0.01019	31.08	0.05314	584.9	2	<.001
62.1614	0.95291			0.014354	0.00577			D16Z2	Yes	<.001	62.16	0.01435	62.15	0.6738	92.23	2	0.003
82.846	0.97332			0.007406	0.00251			D17Z1	Yes	<.001	82.85	0.007406	82.84	0.6882	120.4	2	0.002
48.5603	1.32758			0.010634	0.01284			D17Z1b	Yes	<.001	48.56	0.01063	48.55	0.9388	51.72	2	0.007
23.0141	0.99524			0.013973	0.01102			D18Z1	Yes	<.001	23.01	0.01397	23	0.7038	32.68	2	0.012
39.2544	0.60386			0.011897	0.01124			D18Z2	Yes	<.001	39.25	0.0119	39.24	0.4271	91.89	2	0.003
0.0357849	0.00579			0.019187	0.01503			D19Z4	No	0.282	0.03578	0.01919	0.0166	0.01139	1.457	2	0.631
0.0649092	0.00585			0.006821	0.05055			D19Z5	No	0.248	0.06491	0.006821	0.05809	0.03598	1.614	2	0.631
29.0741	0.45493			0.006018	0.04886			D20Z2	Yes	<.001	29.07	0.006018	29.07	0.3235	89.85	2	0.003
108.464	1.42996			0.008857	0.00863			D21Z1	Yes	<.001	108.5	0.008857	108.5	1.011	107.3	2	0.002
0.037923	0.02079			0.006878	0.02482			D22Z4	No	0.308	0.03792	0.006878	0.03105	0.02289	1.356	2	0.631
0.077204	0.02931			0.025313	0.02971			D22Z5	No	0.221	0.0772	0.02531	0.05189	0.02951	1.758	2	0.631
18.141	0.78695			0.006944	0.00808			DXZ1	Yes	<.001	18.14	0.006944	18.13	0.5565	32.59	2	0.012
0.181867	0.00175			0.012482	0.03224			DYZ3	No	0.018	0.1819	0.01248	0.1694	0.02283	7.419	2	0.133
39.1531	0.86709			0.009244	0.0039			p82H	Yes	<.001	39.15	0.009244	39.14	0.6131	63.84	2	0.005
0.277616	0.04507			0.010904	0.05197			Top3A	No	0.032	0.2776	0.0109	0.2667	0.04864	5.483	2	0.202
0.516323	0.13331			0.03072	0.13197			b-actin	No	0.067	0.5163	0.03072	0.4856	0.1326	3.661	2	0.33
0.516323	0.13056			0.030088	0.12925			GAPDH	No	0.065	0.5163	0.03009	0.4862	0.1299	3.743	2	0.33
Figure 4A
Trisomy 13	Trisomy 21	Healthy		Table Analyzed	Data 1			Table Analyzed	Data 1
9.21958	7.74242	7.89542
9.35903	7.93777	7.99556		Column B	Trisomy 21			Column C	Healthy
9.46915	7.6584	7.95522		vs.	vs.			vs.	vs.
9.01389	7.51935	8.32226		Column A	Trisomy 13			Column A	Trisomy 13
9.45657	8.55335	8.0233
	8.45422	8.04484		Unpaired t test				Unpaired t test
	8.23411	8.07121		P value	<0.0001			P value	<0.0001
	8.62279	8.67798		P value summary	****			P value summary	****
	8.4505	8.81543		Significantly different (P < 0.05)?	Yes			Significantly different (P < 0.05)?	Yes
	8.57494	8.18614		One- or two-tailed P value?	Two-tailed			One- or two-tailed P value?	Two-tailed
	8.87108	8.28987		t, df	t=5.07 df=17			t, df	t=6.437 df=33
	8.05893	8.47925
	8.6717	8.93514		How big is the difference?				How big is the difference?
	8.63144	8.27141		Mean ± SEM of column A	9.304 ± 0.08511, n=5			Mean ± SEM of column A	9.304 ± 0.08511, n=5
		8.4833		Mean ± SEM of column B	8.284 ± 0.1145, n=14			Mean ± SEM of column C	8.326 ± 0.05988, n=30
		8.50346		Difference between means	-1.019 ± 0.201			Difference between means	-0.978 ± 0.1519
		8.43263		95% confidence interval	-1.443 to -0.5951			95% confidence interval	-1.287 to -0.6689
		8.61568		R squared (eta squared)	0.6019			R squared (eta squared)	0.5567
		8.3941
		8.19258		F test to compare variances				F test to compare variances
		8.00381		F, DFn, Dfd	5.069, 13, 4			F, DFn, Dfd	2.97, 29, 4
		7.80806		P value	0.1292			P value	0.2981
		8.38769		P value summary	ns			P value summary	ns
		8.80545		Significantly different (P < 0.05)?	No			Significantly different (P < 0.05)?	No
		8.80545
		8.04792
		8.99291
		8.1055
		8.1055
		8.12343
Figure 4B
Trisomy 13	Trisomy 21	Healthy		Table Analyzed	Data 1			Table Analyzed	Data 1
10.1322	8.64031	10.1203
10.1124	8.69577	10.1724		Column B	Trisomy 21			Column C	Healthy
10.1148	8.58545	10.4257		vs.	vs.			vs.	vs.
10.0348	8.54261	10.3559		Column A	Trisomy 13			Column B	Trisomy 21
10.1232	9.43407	10.0233
	9.29668	9.87092		Unpaired t test				Unpaired t test
	9.18439	10.1223		P value	<0.0001			P value	<0.0001
	9.31152	9.82055		P value summary	****			P value summary	****
	8.85357	9.97024		Significantly different (P < 0.05)?	Yes			Significantly different (P < 0.05)?	Yes
	9.58734	10.1502		One- or two-tailed P value?	Two-tailed			One- or two-tailed P value?	Two-tailed
	9.59348	10.0245		t, df	t=5.541 df=14			t, df	t=9.921 df=54
		10.0522
		9.86371		How big is the difference?				How big is the difference?
		10.0072		Mean ± SEM of column A	10.1 ± 0.01752, n=5			Mean ± SEM of column B	9.066 ± 0.1236, n=11
		9.83278		Mean ± SEM of column B	9.066 ± 0.1236, n=11			Mean ± SEM of column C	9.94 ± 0.03198, n=45
		9.52482		Difference between means	-1.038 ± 0.1873			Difference between means	0.8742 ± 0.08811
		9.7587		95% confidence interval	-1.439 to -0.6359			95% confidence interval	0.6975 to 1.051
		9.68047		R squared (eta squared)	0.6868			R squared (eta squared)	0.6457
		9.98801
		10.0469		F test to compare variances				F test to compare variances
		9.57023		F, DFn, Dfd	109.6, 10, 4			F, DFn, Dfd	3.654, 10, 44
		9.5161		P value	0.0004			P value	0.0026
		9.846		P value summary	***			P value summary	**
		10.0511		Significantly different (P < 0.05)?	Yes			Significantly different (P < 0.05)?	Yes
		9.80148
		9.89307
		9.98447
		10.1226
		9.98791
		9.59
		9.49407
		9.93933
		9.80248
		10.0028
		10.0923
		10.3066
		9.72992
		9.94539
		9.88708
		10.0091
		9.78455
		9.77862
		10.1313
		10.104
		10.1221
Figure 4C
Trisomy 13	Trisomy 21	Healthy		Table Analyzed	Data 1			Table Analyzed	Data 1			Table Analyzed	Data 1
7.26139	7.09276	8.13816
7.37747	6.71994	7.94415		Column B	Trisomy 21			Column C	Healthy			Column C	Healthy
7.24823	7.35935	8.15024		vs.	vs.			vs.	vs.			vs.	vs.
6.64096	7.13966	8.01161		Column A	Trisomy 13			Column A	Trisomy 13			Column B	Trisomy 21
6.73432	7.15224	8.43407
	7.16419	7.92372		Unpaired t test				Unpaired t test				Unpaired t test
	7.55567	7.68773		P value	0.1785			P value	<0.0001			P value	<0.0001
	7.36757	7.65941		P value summary	ns			P value summary	****			P value summary	****
	7.25299	7.80334		Significantly different (P < 0.05)?	No			Significantly different (P < 0.05)?	Yes			Significantly different (P < 0.05)?	Yes
	7.27626	8.19663		One- or two-tailed P value?	Two-tailed			One- or two-tailed P value?	Two-tailed			One- or two-tailed P value?	Two-tailed
	7.37636	7.74835		t, df	t=1.412 df=15			t, df	t=8.831 df=43			t, df	t=10.86 df=50
	7.47783	7.77386
		7.79175		How big is the difference?				How big is the difference?				How big is the difference?
		7.72529		Mean ± SEM of column A	7.052 ± 0.1514, n=5			Mean ± SEM of column A	7.052 ± 0.1514, n=5			Mean ± SEM of column B	7.245 ± 0.0629, n=12
		7.76651		Mean ± SEM of column B	7.245 ± 0.0629, n=12			Mean ± SEM of column C	8.025 ± 0.03453, n=40			Mean ± SEM of column C	8.025 ± 0.03453, n=40
		8.10707		Difference between means	0.1921 ± 0.1361			Difference between means	0.9725 ± 0.1101			Difference between means	0.7804 ± 0.07184
		7.92458		95% confidence interval	-0.09796 to 0.4821			95% confidence interval	0.7504 to 1.195			95% confidence interval	0.6361 to 0.9247
		8.17067		R squared (eta squared)	0.1173			R squared (eta squared)	0.6446			R squared (eta squared)	0.7024
		8.16762
		7.68066		F test to compare variances				F test to compare variances				F test to compare variances
		8.22704		F, DFn, Dfd	2.413, 4, 11			F, DFn, Dfd	2.402, 4, 39			F, DFn, Dfd	1.004, 39, 11
		8.12633		P value	0.2235			P value	0.1324			P value	>0.9999
		8.142		P value summary	ns			P value summary	ns			P value summary	ns
		8.45018		Significantly different (P < 0.05)?	No			Significantly different (P < 0.05)?	No			Significantly different (P < 0.05)?	No
		8.09081
		8.2188
		8.31564
		8.43562
		8.1572
		8.20054
		7.93222
		7.96265
		7.76052
		7.81452
		7.93789
		8.09799
		7.99706
		7.94905
		8.13848
		8.23776
Figure 4D
Trisomy 13	Trisomy 21	Healthy		Table Analyzed	Data 1			Table Analyzed	Data 1
7.43748	7.09276	7.93046
7.98167	6.14581	8.14348		Column B	Trisomy 21			Column C	Healthy
7.62644	6.53029	8.08666		vs.	vs.			vs.	vs.
7.84296	6.11432	8.32336		Column A	Trisomy 13			Column B	Trisomy 21
7.91041	6.75235	7.83007
	7.07113	7.50415		Unpaired t test				Unpaired t test
	6.74517	7.71171		P value	<0.0001			P value	<0.0001
	6.49784	7.65245		P value summary	****			P value summary	****
	7.35377	6.89249		Significantly different (P < 0.05)?	Yes			Significantly different (P < 0.05)?	Yes
	7.11703	7.42433		One- or two-tailed P value?	Two-tailed			One- or two-tailed P value?	Two-tailed
	6.88672	7.48429		t, df	t=5.423 df=15			t, df	t=6.299 df=41
	6.74438	7.3906
		6.83752		How big is the difference?				How big is the difference?
		7.41561		Mean ± SEM of column A	7.76 ± 0.1001, n=5			Mean ± SEM of column B	6.754 ± 0.1108, n=12
		7.90582		Mean ± SEM of column B	6.754 ± 0.1108, n=12			Mean ± SEM of column C	7.586 ± 0.07006, n=31
		7.51077		Difference between means	-1.005 ± 0.1854			Difference between means	0.8317 ± 0.132
		7.42613		95% confidence interval	-1.401 to -0.6103			95% confidence interval	0.5651 to 1.098
		7.81069		R squared (eta squared)	0.6622			R squared (eta squared)	0.4918
		8.13303
		7.67962		F test to compare variances				F test to compare variances
		7.32639		F, DFn, Dfd	2.937, 11, 4			F, DFn, Dfd	1.034, 30, 11
		6.99269		P value	0.3098			P value	>0.9999
		8.08803		P value summary	ns			P value summary	ns
		7.96146		Significantly different (P < 0.05)?	No			Significantly different (P < 0.05)?	No
		7.00245
		7.86203
		7.43002
		7.08965
		7.33358
		7.35774
		7.63001
Figure 5B	Chr 21
CHON-002	5277	1258		Table Analyzed	Unpaired t test data			Table Analyzed	Unpaired t test data
0.74	0.48	0.44
0.72	0.51	0.32		Column B	5277			Column C	1258
0.62	0.39	0.33		vs.	vs.			vs.	vs.
0.54	0.44	0.21		Column A	CHON-002			Column A	CHON-002
0.61	0.5	0.24
0.5	0.4	0.37		Unpaired t test				Unpaired t test
0.71	0.29	0.28		P value	<0.0001			P value	<0.0001
0.51	0.4	0.29		P value summary	****			P value summary	****
0.59	0.37	0.25		Significantly different (P < 0.05)?	Yes			Significantly different (P < 0.05)?	Yes
0.58	0.48	0.34		One- or two-tailed P value?	Two-tailed			One- or two-tailed P value?	Two-tailed
0.63	0.29	0.22		t, df	t=22.64 df=265			t, df	t=15.44 df=149
0.6	0.33	0.23
0.48	0.33	0.23		How big is the difference?				How big is the difference?
0.57	0.4	0.39		Mean ± SEM of column A	0.588 ± 0.00771, n=126			Mean ± SEM of column A	0.588 ± 0.00771, n=126
0.51	0.31	0.3		Mean ± SEM of column B	0.3362 ± 0.007947, n=141			Mean ± SEM of column C	0.304 ± 0.01386, n=25
0.68	0.29	0.36		Difference between means	-0.2518 ± 0.01113			Difference between means	-0.284 ± 0.01839
0.76	0.29	0.44		95% confidence interval	-0.2738 to -0.2299			95% confidence interval	-0.3204 to -0.2477
0.77	0.14	0.36		R squared (eta squared)	0.6591			R squared (eta squared)	0.6155
0.57	0.46	0.23
0.71	0.25	0.36		F test to compare variances				F test to compare variances
0.67	0.22	0.32		F, DFn, Dfd	1.189, 140, 125			F, DFn, Dfd	1.56, 125, 24
0.59	0.3	0.31		P value	0.3239			P value	0.2062
0.59	0.21	0.2		P value summary	ns			P value summary	ns
0.58	0.19	0.25		Significantly different (P < 0.05)?	No			Significantly different (P < 0.05)?	No
0.67	0.19	0.33
0.66	0.31
0.51	0.47
0.42	0.3
0.6	0.2
0.76	0.18
0.48	0.29
0.56	0.26
0.52	0.25
0.4	0.54
0.51	0.48
0.6	0.51
0.51	0.21
0.46	0.18
0.72	0.21
0.51	0.25
0.54	0.24
0.57	0.29
0.51	0.3
0.5	0.22
0.51	0.19
0.57	0.44
0.53	0.4
0.53	0.32
0.56	0.32
0.79	0.35
0.69	0.31
0.48	0.43
0.57	0.44
0.47	0.35
0.73	0.48
0.61	0.35
0.48	0.47
0.53	0.25
0.68	0.45
0.71	0.41
0.53	0.42
0.58	0.5
0.63	0.3
0.53	0.28
0.59	0.27
0.56	0.26
0.5	0.43
0.53	0.25
0.73	0.39
0.57	0.39
0.58	0.23
0.66	0.27
0.61	0.36
0.47	0.34
0.66	0.21
0.69	0.27
0.45	0.39
0.45	0.31
0.58	0.23
0.56	0.35
0.63	0.28
0.63	0.36
0.65	0.26
0.71	0.32
0.54	0.21
0.53	0.22
0.47	0.26
0.46	0.39
0.5	0.38
0.61	0.37
0.57	0.26
0.61	0.2
0.55	0.34
0.58	0.21
0.67	0.23
0.6	0.27
0.71	0.18
0.71	0.3
0.56	0.37
0.67	0.4
0.67	0.31
0.55	0.44
0.57	0.39
0.56	0.23
0.67	0.29
0.52	0.4
0.48	0.39
0.52	0.43
0.44	0.33
0.59	0.39
0.67	0.42
0.69	0.46
0.6	0.54
0.53	0.26
0.51	0.34
0.53	0.21
0.78	0.32
0.59	0.43
0.76	0.43
0.63	0.28
0.5	0.23
0.6	0.47
0.56	0.35
0.58	0.43
0.61	0.44
0.68	0.25
	0.28
	0.4
	0.46
	0.47
	0.43
	0.3
	0.26
	0.27
	0.27
	0.47
	0.51
	0.41
	0.41
	0.31
	0.32
Fig 5B	Chr 1
CHON-002	5277	1258		Table Analyzed	Unpaired t test data			Table Analyzed	Unpaired t test data
0.54	0.59	0.44
0.54	0.52	0.47		Column B	5277			Column C	1258
0.48	0.55	0.58		vs.	vs.			vs.	vs.
0.44	0.55	0.52		Column A	CHON-002			Column A	CHON-002
0.52	0.47	0.47
0.61	0.61	0.5		Unpaired t test				Unpaired t test
0.53	0.51	0.53		P value	0.0722			P value	0.3244
0.56	0.5	0.51		P value summary	ns			P value summary	ns
0.58	0.56	0.54		Significantly different (P < 0.05)?	No			Significantly different (P < 0.05)?	No
0.52	0.63	0.58		One- or two-tailed P value?	Two-tailed			One- or two-tailed P value?	Two-tailed
0.47	0.48			t, df	t=1.818 df=94			t, df	t=0.9939 df=58
0.57	0.54
0.56	0.57			How big is the difference?				How big is the difference?
0.56	0.49			Mean ± SEM of column A	0.5288 ± 0.005991, n=50			Mean ± SEM of column A	0.5288 ± 0.005991, n=50
0.54	0.57			Mean ± SEM of column B	0.5446 ± 0.006269, n=46			Mean ± SEM of column C	0.514 ± 0.01462, n=10
0.58	0.51			Difference between means	0.01577 ± 0.00867			Difference between means	-0.0148 ± 0.01489
0.57	0.54			95% confidence interval	-0.001448 to 0.03298			95% confidence interval	-0.04461 to 0.01501
0.52	0.5			R squared (eta squared)	0.03398			R squared (eta squared)	0.01675
0.53	0.5
0.57	0.54			F test to compare variances				F test to compare variances
0.51	0.58			F, DFn, Dfd	1.007, 45, 49			F, DFn, Dfd	1.191, 9, 49
0.56	0.53			P value	0.9769			P value	0.6435
0.51	0.53			P value summary	ns			P value summary	ns
0.5	0.61			Significantly different (P < 0.05)?	No			Significantly different (P < 0.05)?	No
0.5	0.47
0.48	0.55
0.53	0.5
0.53	0.54
0.61	0.51
0.5	0.55
0.57	0.5
0.51	0.54
0.45	0.59
0.57	0.57
0.5	0.5
0.42	0.59
0.58	0.48
0.58	0.53
0.54	0.58
0.48	0.61
0.51	0.61
0.51	0.57
0.58	0.59
0.5	0.52
0.5	0.58
0.54	0.59
0.5
0.5
0.5
0.58
Fig S8A
				log values								log values
	PCR	PERCON		PCR	Percon	Pearson r			1000 genomes	PERCON		1000 genomes	Percon
D2Z1	35047	11125.2		4.54465	4.04631	r	0.7355		26388	11125		4.42141	4.0463	Pearson r	0.9262
D3Z1	17137	12293.3		4.23393	4.08967	95% confidence interval	0.4223 to 0.8918		22880	12293		4.35946	4.08966	r	0.8147 to 0.9716
D4Z1	949	11882.4		2.97727	4.0749	R squared	0.5409		10919	11882		4.03818	4.07489	95% confidence interval	0.8578
D6Z1	8354	7462.26		3.92189	3.87287				21373	7462		4.32987	3.87286	R squared
D7Z1	69502	15547.3		4.842	4.19165	P value			15905	15547		4.20153	4.19165
D8Z2	22145	10780.8		4.34528	4.03265	P (two-tailed)	0.0003		16797	10781		4.22523	4.03266	P value	<0.0001
D9Z4	20720	12449.8		4.31639	4.09516	P value summary	***		2657	12450		3.42439	4.09517	P (two-tailed)	****
D10Z1	14103	9131.23		4.14931	3.96053	Significant? (alpha = 0.05)	Yes		9030	9131		3.95569	3.96052	P value summary	Yes
D11Z1	39225	19017.4		4.59356	4.27915				5853	19017		3.76738	4.27914	Significant? (alpha = 0.05)
D12Z3	205	13742.4		2.31175	4.13806	Number of XY Pairs	19		9598	13742		3.98218	4.13805		19
D13Z1/D21Z1	26495	3699.33		4.42316	3.56812				16696	3699		4.22261	3.56808	Number of XY Pairs
D15Z3	268	8012.55		2.42813	3.90377				10145	8013		4.00625	3.9038
D16Z2	14731	11274.9		4.16823	4.05211				30258	11275		4.48084	4.05212
D17Z1	916	19717		2.9619	4.29484				12596	19717		4.10023	4.29484
D18Z1	47908	27857.2		4.68041	4.44494				19852	27857		4.2978	4.44493
D20Z2	95484	11031.5		4.97993	4.04264				12039	11032		4.08059	4.04265
DXZ1	6780	22262.9		3.83123	4.34758				5769	22263		3.7611	4.34758
DYZ3	526	1328.04		2.72099	3.12321				931	1328		2.96895	3.1232
Top3A	2	2		0.30103	0.30103				2	2		0.30103	0.30103
Fig S9B	copies
Gender		D8Z2	D18Z1	D18Z2	DXZ1	DYZ3
M	NA00425.8	273.966	851.72	101.09	49.4594	43.6634		Table Analyzed	D8Z2					Number of families	1
M	NA02030.8	203.603	1193.34	95.35	56.7701	48.8527		Data sets analyzed	A : Control	B : Trisomy 8	C : Trisomy 18			Number of comparisons per family	2
M	NA 00496.8	300.21	1094.36	97.4403	52.4251	17.7909								Alpha	0.05
F	GM02596.8	241.226	1040.05	42.2514	83.0841	0		ANOVA summary
F	GM04610.8	346.826	258.78	138.93	68.3791	0		F	55.18					Dunnett's multiple comparisons test	Mean Diff.	95.00% CI of diff.	Significant?	Summary	Adjusted P Value	A-?
M	NA02732.18	129.774	1609.42	173.54	38.005	16.2935		P value	<0.0001
F	NA03623.18X	141.421	1662.46	198.21	142.662	0		P value summary	****					Control vs. Trisomy 8	-158.8	-195.3 to -122.2	Yes	****	0.0001	B	Trisomy 8
F	GM03538.18	152.516	1823.63	220.547	87.697	0		Significant diff. among means (P < 0.05)?	Yes					Control vs. Trisomy 18	-24.58	-64.25 to 15.09	No	ns	0.2601	C	Trisomy 18
M	GM03769.18	132.244	1594.99	205.812	52.6273	53.3978		R square	0.8598
F	NA02598.XY	172.07	1185.55	85.1786	55.01	13.6
M	Control 1	118.13	1162.65	117	48.8238	19.3349		Brown-Forsythe test						Test details	Mean 1	Mean 2	Mean Diff.	SE of diff.	n1	n2	q	DF
F	Control 2	126.922	938.62	96.78	86.6988	0		F (DFn, DFd)	6.416 (2, 18)
M	Control 3	145.904	1187.88	130.05	42.2229	13.6809		P value	0.0079					Control vs. Trisomy 8	114.4	273.2	-158.8	15.25	12	5	10.41	18
M	Control 4	108.606	1146.76	114.55	44.6653	28.4989		P value summary	**					Control vs. Trisomy 18	114.4	139	-24.58	16.54	12	4	1.486	18
M	Control 5	86.6088	850.86	111.41	33.6639	31.3582		Are SDs significantly different (P < 0.05)?	Yes
M	Control 6	118.729	1215.12	105.4	38.0942	48.0875
M	Control 7	116.941	1207.66	107.93	49.0837	31.3582		Bartlett's test
M	Control 8	110.869	983.34	92.13	29.3955	48.0875		Bartlett's statistic (corrected)	13.92
F	Control 9	125.582	748.73	94.39	80.79	0		P value	0.0009
M	Control 10	108.29	925.58	89.59	48.4384	53.3978		P value summary	***
M	Control 11	105.388	1072.96	107.53	41.6965	26.0793		Are SDs significantly different (P < 0.05)?	Yes
M	Control 12	100.914	1010.72	91.45	33.9488	38.8269
M	Mouse	0	0	0	0	0		ANOVA table	SS	DF	MS	F (DFn, DFd)	P value
	Positive Control	65.4753	685.73	41.06	71.4561	25.8346		Treatment (between columns)	90540	2	45270	F (2, 18) = 55.18	P<0.0001
								Residual (within columns)	14768	18	820.5
								Total	105309	20
								Data summary
								Number of treatments (columns)	3
								Number of values (total)	21
								Table Analyzed	D18Z1					Number of families	1
								Data sets analyzed	A : Control	B : Trisomy 8	C : Trisomy 18			Number of comparisons per family	2
														Alpha	0.05
								ANOVA summary
								F	16.75					Dunnett's multiple comparisons test	Mean Diff.	95.00% CI of diff.	Significant?	Summary	Adjusted P Value	A-?
								P value	<0.0001
								P value summary	****					Control vs. Trisomy 8	149.9	-126.8 to 426.6	No	ns	0.345	B	Trisomy 8
								Significant diff. among means (P < 0.05)?	Yes					Control vs. Trisomy 18	-635.1	-935.2 to -334.9	Yes	***	0.0002	C	Trisomy 18
								R square	0.6505
								Brown-Forsythe test						Test details	Mean 1	Mean 2	Mean Diff.	SE of diff.	n1	n2	q	DF
								F (DFn, DFd)	1.264 (2, 18)
								P value	0.3064					Control vs. Trisomy 8	1038	887.6	149.9	115.3	12	5	1.3	18
								P value summary	ns					Control vs. Trisomy 18	1038	1673	-635.1	125.1	12	4	5.076	18
								Are SDs significantly different (P < 0.05)?	No
								Bartlett's test
								Bartlett's statistic (corrected)	7.011
								P value	0.03
								P value summary	*
								Are SDs significantly different (P < 0.05)?	Yes
								ANOVA table	SS	DF	MS	F (DFn, DFd)	P value
								Treatment (between columns)	1572872	2	786436	F (2, 18) = 16.75	P<0.0001
								Residual (within columns)	845248	18	46958
								Total	2418120	20
								Data summary
								Number of treatments (columns)	3
								Number of values (total)	21
								Table Analyzed	D18Z2					Number of families	1
								Data sets analyzed	A : Control	B : Trisomy 8	C : Trisomy 18			Number of comparisons per family	2
														Alpha	0.05
								ANOVA summary
								F	36.91					Dunnett's multiple comparisons test	Mean Diff.	95.00% CI of diff.	Significant?	Summary	Adjusted P Value	A-?
								P value	<0.0001
								P value summary	****					Control vs. Trisomy 8	9.838	-16.4 to 36.07	No	ns	0.5793	B	Trisomy 8
								Significant diff. among means (P < 0.05)?	Yes					Control vs. Trisomy 18	-94.68	-123.1 to -66.22	Yes	****	0.0001	C	Trisomy 18
								R square	0.804
								Brown-Forsythe test						Test details	Mean 1	Mean 2	Mean Diff.	SE of diff.	n1	n2	q	DF
								F (DFn, DFd)	0.9748 (2, 18)
								P value	0.3963					Control vs. Trisomy 8	104.9	95.01	9.838	10.94	12	5	0.8996	18
								P value summary	ns					Control vs. Trisomy 18	104.9	199.5	-94.68	11.86	12	4	7.981	18
								Are SDs significantly different (P < 0.05)?	No
								Bartlett's test
								Bartlett's statistic (corrected)	6.595
								P value	0.037
								P value summary	*
								Are SDs significantly different (P < 0.05)?	Yes
								ANOVA table	SS	DF	MS	F (DFn, DFd)	P value
								Treatment (between columns)	31168	2	15584	F (2, 18) = 36.91	P<0.0001
								Residual (within columns)	7599	18	422.2
								Total	38767	20
								Data summary
								Number of treatments (columns)	3
								Number of values (total)	21
								Table Analyzed	DXZ1
								Column B	female
								vs.	vs.
								Column A	male
								Unpaired t test
								P value	<0.0001
								P value summary	****
								Significantly different (P < 0.05)?	Yes
								One- or two-tailed P value?	Two-tailed
								t, df	t=6.608 df=20
								How big is the difference?
								Mean ± SEM of column A	44.65 ± 2.064, n=16
								Mean ± SEM of column B	91.55 ± 10.61, n=6
								Difference between means	46.91 ± 7.099
								95% confidence interval	32.1 to 61.71
								R squared (eta squared)	0.6858
								F test to compare variances
								F, DFn, Dfd	9.902, 5, 15
								P value	0.0005
								P value summary	***
								Significantly different (P < 0.05)?	Yes
								Table Analyzed	DYZ3
								Column B	female
								vs.	vs.
								Column A	male
								Unpaired t test
								P value	<0.0001
								P value summary	****
								Significantly different (P < 0.05)?	Yes
								One- or two-tailed P value?	Two-tailed
								t, df	t=5.49 df=20
								How big is the difference?
								Mean ± SEM of column A	33.27 ± 3.655, n=16
								Mean ± SEM of column B	0 ± 0, n=6
								Difference between means	-33.27 ± 6.061
								95% confidence interval	-45.91 to -20.63
								R squared (eta squared)	0.6011
								F test to compare variances
								F, DFn, Dfd	Infinity, 15, 5
								P value	<0.0001
								P value summary	****
								Significantly different (P < 0.05)?	Yes
Figure S10B
z-scores
	RWPE-1				DU145				LnCaP				PC3				VCaP
	DNA	RNA			DNA	RNA			DNA	RNA			DNA	RNA			DNA	RNA
D2Z1	2.39976	0.769655			2.22948	0.738245			1.0487	3.67267			1.04957	2.1627			1.56565	2.00056
D3Z1	-0.0517889	-0.353639			-0.183989	-0.0652023			-1.32368	-0.45898			-1.12999	0.32911			-0.631709	-0.120401
D4Z1	-2.6387	-0.159363			-2.23266	-0.567045			-3.37743	-0.419317			-3.3982	-0.246696			-2.93703	-0.404973
D5Z1	-1.8171	-0.602205			-2.55504	-0.341091			-2.70642	-0.639143			-3.4204	-0.392105			-4.11556	-0.298165
D7Z1	3.5597	0.195843			3.60761	0.321544			2.22628	0.89555			1.98496	0.549233			3.12959	2.06987
D8Z2	-0.301829	-0.140942			-0.034559	-0.156841			-1.49282	0.0396321			-1.70982	-0.108964			-0.2687	0.100651
D9Z4	-0.605264	-0.111571			0.294654	-0.0337319			-2.11389	-0.108015			-2.8125	-0.160782			-1.09524	-0.146893
D10Z1	-2.25221	0.3727			-2.39119	0.880777			-2.17749	0.148227			-4.62214	0.446715			-2.48036	1.98579
D11Z1	0.722681	-0.317018			0.687666	-0.128357			-0.0434107	0.0556301			-0.943758	-0.163846			0.659707	-0.142217
D13Z1	0.0821958	1.07892			1.09559	1.01455			0.208933	3.07709			-0.441445	1.4197			-1.90913	1.40852
D15Z3	-9.01243	-0.511864			-9.25499	-0.48539			-8.29848	-0.387047			-8.26834	-0.338422			-9.83852	-0.317223
D18Z2	-3.09591	1.18498			-2.45773	0.919256			-4.28963	0.680766			-3.9557	0.758358			-3.78406	1.28855
D20Z1	2.00038	0.537153			1.8327	0.253111			1.61409	1.44275			1.76553	0.812507			1.81981	1.25287
D22Z4	-10.8072	-0.745058			-9.99407	-0.525187			-9.92377	-0.697228			-10.1323	-0.727582			-9.10419	-0.731963
DXZ1	-5.24381	-0.953633			-6.2298	-1.09959			-5.78677	-0.576358			-5.07018	-0.68353			-5.23532	-0.888362
DYZ3	-6.46219	0			-6.85689	0.248119			-6.5114	0.37974			-6.5114	0.361942			-7.37141	0.657335
	Pearson r				Pearson r				Pearson r				Pearson r				Pearson r
	r	0.4899			r	0.5054			r	0.5776			r	0.6196			r	0.5331
	95% confidence interval	-0.007656 to 0.793			95% confidence interval	0.013 to 0.8006			95% confidence interval	0.1147 to 0.8344			95% confidence interval	0.1789 to 0.8533			95% confidence interval	0.05083 to 0.8138
	R squared	0.24			R squared	0.2555			R squared	0.3336			R squared	0.3839			R squared	0.2842
	P value				P value				P value				P value				P value
	P (two-tailed)	0.0541			P (two-tailed)	0.0458			P (two-tailed)	0.0191			P (two-tailed)	0.0105			P (two-tailed)	0.0335
	P value summary	ns			P value summary	*			P value summary	*			P value summary	*			P value summary	*
	Significant? (alpha = 0.05)	No			Significant? (alpha = 0.05)	Yes			Significant? (alpha = 0.05)	Yes			Significant? (alpha = 0.05)	Yes			Significant? (alpha = 0.05)	Yes
	Number of XY Pairs	16			Number of XY Pairs	16			Number of XY Pairs	16			Number of XY Pairs	16			Number of XY Pairs	16
